# Supplementary material for: Neuroprotection by Heat Shock Factor-1 (HSF1) and Trimerization-Deficient Mutant Identifies Novel Alterations in Gene Expression
Source: PubMed Central journal article supplement (PMC6250741; doi:10.1038/s41598-018-35610-1), 2018-11-22
Supplement: 41598_2018_35610_MOESM1_ESM.pdf [file 41598_2018_35610_MOESM1_ESM.pdf]

# **Neuroprotection by Heat Shock Factor-1 (HSF1) and Trimerization Deficient Mutant Identifies Novel Alterations in Gene Expression**

Zhe Qu<sup>1</sup>, Anton Sam Crosslee Louis Sam Titus<sup>1</sup>, Zhenyu Xuan<sup>2</sup>, Santosh R. D'Mello<sup>1</sup>

Department of Biological Sciences, Southern Methodist University, Dallas, TX 75275<sup>1</sup> and Department of Biological Sciences, University of Texas at Dallas, Richardson, TX 75080<sup>2</sup>

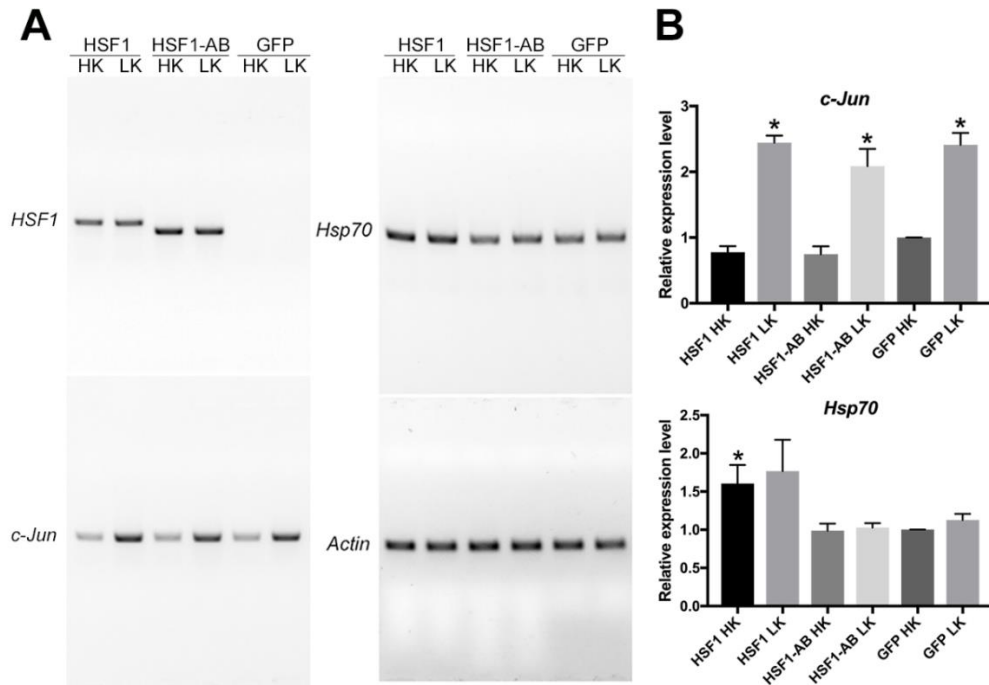

**Figure S1. Marker gene expression in CGNs overexpressing HSF1 or HSF1- AB.** HSF1 and HSF1-AB were overexpressed in CGNs for 40 hours followed by HK or LK treatment for 8 hours. As a step of quality control before we ran RNA-Seq analysis with the samples, we examined the expression level of two marker genes, *c-Jun* and *Hsp70*, using RT-PCR. Panel (A) contains uncropped DNA gel images from which RTPCR result in Figure 1B is derived. (B) Densitometric analysis with the images showed that expression of *c-Jun* was robustly elevated by LK treatment compared to HK (\*,  $P < 0.05$ ), while level of *Hsp70* was upregulated by wild type HSF1 in HK compared to GFP control (\*,  $P < 0.05$ ) but not by HSF1-AB. *Hsp70* level in HSF1 LK displayed increase but it was not significant. *Actin* served as an internal control.

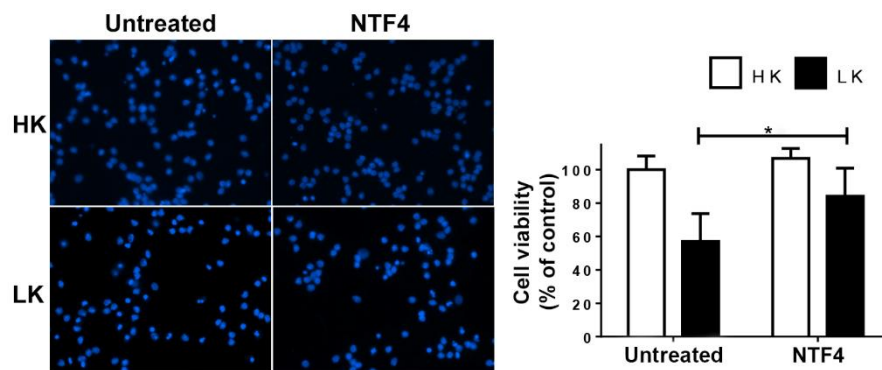

**Figure S2. Effect of HSF1-AB-regulated genes in neuroprotection.** CGNs were subjected to HK or LK treatment for 24 hours in the present or absent of 100 ng/mL of human NTF4 protein. Cell viability analysis by DAPI staining showed that LK treatment induced approximately 43% cell death, but NTF4 was able to restore the cell death level to about 21%. \*,  $P < 0.05$ .

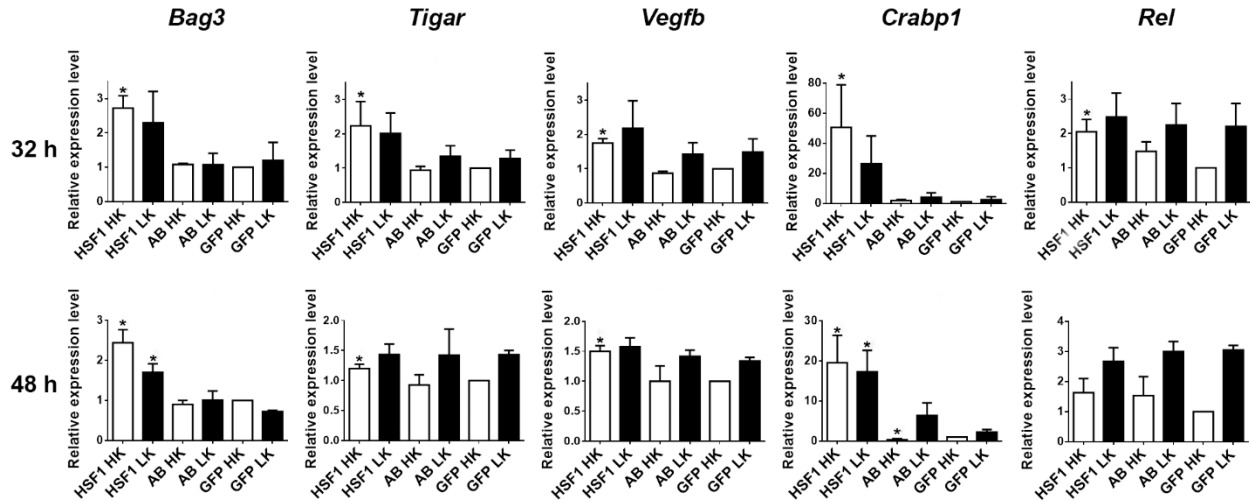

**Figure S3. Level of HSF1-regulated genes at different time points.** HSF1 and HSF1-AB were overexpressed in CGNs for 32 hours or 48 hours followed by LK treatment before RNA isolation. Expression level of 5 genes (*Bag3*, *Tigar*, *Vegfb*, *Crabp1*, and *Rel*) was then examined by QPCR. Statistical analysis was performed comparing HSF1/HSF1-AB HK with GFP HK and HSF1/HSF1-AB LK with GFP LK. \*,  $P < 0.05$ . The results showed that these mRNAs were upregulated by HSF1 but not by HSF1-AB, which is in line with our findings at 40 hours. Expression of these mRNAs in HSF1 LK at 32 hours exhibited certain increase but it was not significant. In HSF1-AB HK at 48 hours, level of *Crabp1* decreased compared to GFP HK, which is consistent with what we observed at 40 hours as well.

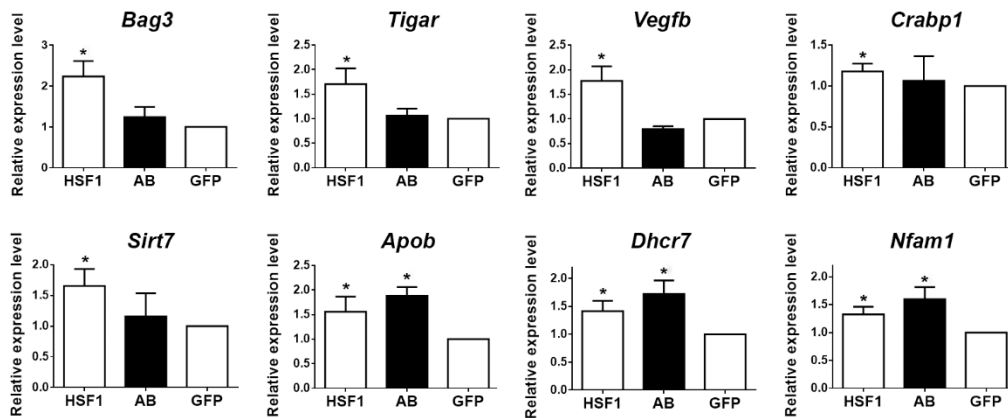

**Figure S4. Expression level of HSF1/HSF1-AB-regulated genes in cortical neurons.** HSF1 and HSF1-AB were overexpressed in cortical neurons for 48 hours, and then level of 8 DEGs identified in CGNs was examined by QPCR. Consistent with what we observed in CGNs, our results showed that 5 genes (*Bag3*, *Tigar*, *Vegfb*, *Crabp1*, and *Sirt7*) were stimulated by HSF1 and the other 3 genes (*Apob*, *Dhcr7*, and *Nfam1*) were targets of both HSF1 and HSF1-AB in cortical neurons. \*,  $P < 0.05$ .

**Table S1. HSF1-regulated genes in healthy CGNs**

The RNA-Seq analysis was conducted using three sets of samples prepared from independent neuronal cultures infected either with Ad-HSF1, Ad-HSF1-AB, or Ad-GFP. In this table, expression level (log<sub>2</sub>-transformed) of the HSF1 targets in HK in HSF1-expressing and GFP-expressing samples is shown along with log<sub>2</sub> [fold change] and FDR.

**Table S1. HSF1-regulated genes in healthy CGNs**

| <b>Genes</b>   | <b>HSF1 HK-1</b> | <b>HSF1 HK-2</b> | <b>HSF1 HK-3</b> | <b>GFP HK-1</b> | <b>GFP HK-2</b> | <b>GFP HK-3</b> | <b>Log2 [fold change]</b> | <b>FDR</b> |
|----------------|------------------|------------------|------------------|-----------------|-----------------|-----------------|---------------------------|------------|
| Slc34a2        | 1.974            | 2.510            | 3.026            | 0.000           | 0.000           | 0.024           | 9.269                     | 4.42E-06   |
| Crybb1         | 1.397            | 1.663            | 2.572            | 0.000           | 0.000           | 0.000           | 8.268                     | 1.08E-03   |
| AABR07069913.1 | 1.722            | 1.925            | 2.824            | 0.000           | 0.000           | 0.000           | 8.085                     | 9.59E-04   |
| LOC102546376   | 0.705            | 3.632            | 3.350            | 0.000           | 0.000           | 0.000           | 7.628                     | 1.12E-02   |
| Krt42          | 0.739            | 1.134            | 1.637            | 0.000           | 0.000           | 0.000           | 7.611                     | 2.14E-04   |
| AABR07016950.1 | 2.543            | 3.257            | 4.071            | 0.000           | 0.000           | 0.000           | 7.535                     | 3.51E-03   |
| AABR07016919.1 | 1.655            | 2.284            | 2.831            | 0.000           | 0.000           | 0.000           | 7.411                     | 5.14E-04   |
| NEWGENE_156225 | 1.597            | 0.000            | 1.530            | 0.000           | 0.000           | 0.000           | 7.290                     | 1.38E-02   |
| Crabp1         | 5.389            | 5.619            | 6.007            | 0.317           | 0.666           | 0.459           | 6.934                     | 3.85E-07   |
| Apob           | 0.050            | 0.101            | 0.212            | 0.000           | 0.000           | 0.000           | 6.811                     | 2.93E-02   |
| Ovol2          | 1.851            | 1.833            | 2.736            | 0.107           | 0.000           | 0.000           | 6.578                     | 4.03E-04   |
| Angptl1        | 0.588            | 0.703            | 0.588            | 0.000           | 0.000           | 0.000           | 6.565                     | 1.04E-04   |
| Nmb            | 6.083            | 6.277            | 6.785            | 0.850           | 1.057           | 0.940           | 6.470                     | 2.79E-09   |
| Plac9          | 2.835            | 3.481            | 4.126            | 0.000           | 0.168           | 0.271           | 6.466                     | 1.46E-05   |
| Kank4          | 3.611            | 3.467            | 4.387            | 0.163           | 0.172           | 0.329           | 6.320                     | 1.39E-07   |
| Myo1h          | 1.237            | 1.226            | 1.423            | 0.000           | 0.073           | 0.000           | 6.313                     | 2.18E-05   |
| Rfx6           | 1.685            | 1.693            | 2.798            | 0.041           | 0.050           | 0.082           | 6.260                     | 6.24E-05   |
| Pitx2          | 2.015            | 2.583            | 2.654            | 0.074           | 0.089           | 0.074           | 6.153                     | 9.05E-07   |
| AABR07069821.1 | 2.081            | 2.906            | 2.471            | 0.000           | 0.240           | 0.000           | 6.100                     | 1.28E-04   |
| Sox15          | 2.717            | 2.668            | 3.540            | 0.000           | 0.383           | 0.000           | 6.063                     | 3.42E-05   |
| LOC102550797   | 0.632            | 1.907            | 1.475            | 0.000           | 0.000           | 0.000           | 6.056                     | 1.86E-02   |
| Pax7           | 2.538            | 2.839            | 3.304            | 0.069           | 0.160           | 0.196           | 5.905                     | 2.18E-05   |
| Igfbp1         | 4.802            | 5.111            | 6.192            | 0.536           | 0.747           | 1.017           | 5.902                     | 9.05E-07   |
| Nodal          | 0.511            | 0.790            | 1.416            | 0.048           | 0.000           | 0.000           | 5.804                     | 2.82E-03   |
| Tchh           | 3.645            | 4.216            | 4.509            | 0.293           | 0.431           | 0.448           | 5.764                     | 2.93E-07   |
| Mcoln2         | 0.128            | 0.211            | 0.460            | 0.000           | 0.000           | 0.000           | 5.673                     | 1.03E-02   |
| Gipc3          | 0.400            | 0.484            | 0.897            | 0.000           | 0.000           | 0.000           | 5.671                     | 1.96E-03   |

|                |       |       |       |       |       |       |       |          |
|----------------|-------|-------|-------|-------|-------|-------|-------|----------|
| Nipal1         | 0.318 | 0.522 | 0.990 | 0.000 | 0.000 | 0.091 | 5.662 | 2.30E-03 |
| Zfp93          | 2.091 | 2.355 | 3.199 | 0.143 | 0.116 | 0.144 | 5.631 | 4.42E-06 |
| Pde6b          | 0.682 | 0.638 | 0.959 | 0.000 | 0.000 | 0.043 | 5.608 | 5.34E-04 |
| Madcam1        | 3.025 | 3.947 | 3.974 | 0.224 | 0.341 | 0.357 | 5.605 | 1.39E-07 |
| Drd5           | 0.363 | 0.909 | 1.785 | 0.070 | 0.000 | 0.000 | 5.588 | 2.80E-03 |
| LOC102546495   | 0.329 | 1.239 | 1.822 | 0.000 | 0.000 | 0.000 | 5.574 | 2.45E-02 |
| Dmrt1          | 0.576 | 1.252 | 1.449 | 0.000 | 0.000 | 0.099 | 5.515 | 3.75E-03 |
| Utf1           | 0.179 | 0.355 | 0.873 | 0.000 | 0.000 | 0.000 | 5.510 | 1.60E-02 |
| Tmem102        | 1.169 | 1.169 | 1.607 | 0.060 | 0.000 | 0.060 | 5.408 | 1.41E-05 |
| Kcnj15         | 0.509 | 0.982 | 1.618 | 0.000 | 0.000 | 0.079 | 5.407 | 2.01E-03 |
| Sctr           | 2.080 | 1.920 | 2.627 | 0.054 | 0.242 | 0.054 | 5.402 | 1.27E-06 |
| Esr2           | 1.579 | 1.889 | 2.709 | 0.047 | 0.111 | 0.227 | 5.311 | 1.13E-04 |
| Ntf4           | 0.710 | 0.717 | 1.418 | 0.077 | 0.000 | 0.000 | 5.184 | 2.47E-03 |
| Esr1           | 3.652 | 3.127 | 4.536 | 0.529 | 0.567 | 0.380 | 5.124 | 4.56E-05 |
| LOC100360908   | 0.978 | 1.492 | 1.931 | 0.089 | 0.000 | 0.090 | 5.111 | 7.72E-03 |
| Spetex-2F      | 1.685 | 2.955 | 3.680 | 0.117 | 0.177 | 0.120 | 5.098 | 1.36E-04 |
| Pde4c          | 1.229 | 1.583 | 1.851 | 0.000 | 0.104 | 0.130 | 5.048 | 1.71E-04 |
| Adamts19       | 0.683 | 0.954 | 1.391 | 0.000 | 0.057 | 0.071 | 5.047 | 5.39E-05 |
| Adgrg2         | 3.774 | 3.442 | 4.334 | 0.426 | 0.679 | 0.431 | 5.024 | 1.01E-07 |
| Cyp2s1         | 2.833 | 3.161 | 4.089 | 0.278 | 0.363 | 0.486 | 5.020 | 3.11E-06 |
| AABR07016976.1 | 2.063 | 4.174 | 4.472 | 0.634 | 0.533 | 0.246 | 5.003 | 3.67E-04 |
| Irx4           | 0.107 | 0.147 | 0.174 | 0.000 | 0.000 | 0.000 | 4.970 | 3.56E-02 |
| Mfsd2b         | 0.062 | 0.344 | 0.281 | 0.000 | 0.000 | 0.000 | 4.965 | 9.15E-03 |
| RT1-M5         | 1.452 | 2.234 | 2.275 | 0.000 | 0.417 | 0.000 | 4.893 | 2.69E-04 |
| Vwde           | 0.806 | 1.126 | 1.808 | 0.000 | 0.056 | 0.137 | 4.856 | 1.63E-04 |
| Anxa3          | 2.224 | 2.529 | 3.052 | 0.036 | 0.321 | 0.364 | 4.829 | 1.41E-05 |
| Plxdc1         | 3.128 | 3.087 | 3.779 | 0.330 | 0.560 | 0.335 | 4.798 | 2.15E-07 |
| Crhr2          | 1.571 | 1.982 | 3.268 | 0.000 | 0.206 | 0.521 | 4.783 | 8.54E-04 |
| Cilp           | 0.161 | 0.247 | 0.471 | 0.000 | 0.030 | 0.000 | 4.746 | 5.35E-03 |

|                |       |       |       |       |       |       |       |          |
|----------------|-------|-------|-------|-------|-------|-------|-------|----------|
| Sypl2          | 5.060 | 4.943 | 5.675 | 1.212 | 1.459 | 1.099 | 4.716 | 6.87E-07 |
| Ddx43          | 1.726 | 2.703 | 3.105 | 0.083 | 0.287 | 0.387 | 4.682 | 9.81E-05 |
| Fbxw10         | 0.917 | 1.057 | 1.495 | 0.000 | 0.129 | 0.073 | 4.673 | 1.18E-04 |
| Rufy4          | 0.508 | 0.499 | 1.015 | 0.000 | 0.055 | 0.047 | 4.650 | 3.04E-04 |
| Prss56         | 2.265 | 2.168 | 2.355 | 0.141 | 0.270 | 0.188 | 4.648 | 9.05E-07 |
| Cryab          | 7.471 | 7.805 | 7.499 | 2.670 | 3.600 | 3.023 | 4.629 | 9.67E-08 |
| Amz1           | 3.436 | 3.512 | 4.028 | 0.373 | 0.775 | 0.618 | 4.553 | 3.85E-07 |
| Clec14a        | 1.006 | 1.420 | 1.988 | 0.075 | 0.091 | 0.149 | 4.542 | 1.04E-04 |
| Prss16         | 1.294 | 1.658 | 1.838 | 0.048 | 0.113 | 0.185 | 4.542 | 1.08E-04 |
| Apoh           | 1.632 | 1.532 | 1.901 | 0.112 | 0.135 | 0.114 | 4.538 | 1.59E-04 |
| Alx3           | 0.196 | 0.137 | 0.236 | 0.000 | 0.000 | 0.000 | 4.531 | 1.85E-02 |
| Fezf2          | 0.605 | 0.879 | 1.445 | 0.000 | 0.063 | 0.103 | 4.522 | 2.34E-03 |
| Vwf            | 1.903 | 2.037 | 2.593 | 0.220 | 0.163 | 0.233 | 4.516 | 1.12E-06 |
| Comp           | 3.593 | 3.735 | 4.196 | 0.708 | 0.821 | 1.190 | 4.512 | 2.04E-06 |
| Acvrl1         | 1.445 | 1.895 | 2.761 | 0.127 | 0.150 | 0.314 | 4.476 | 3.26E-05 |
| Kremen2        | 0.213 | 0.369 | 0.698 | 0.000 | 0.000 | 0.048 | 4.461 | 3.55E-03 |
| AABR07044980.1 | 0.948 | 0.848 | 1.644 | 0.053 | 0.123 | 0.053 | 4.447 | 1.06E-03 |
| Endou          | 0.353 | 0.322 | 0.449 | 0.000 | 0.049 | 0.000 | 4.439 | 1.46E-02 |
| LOC108351043   | 2.104 | 1.992 | 3.274 | 0.000 | 0.298 | 0.471 | 4.434 | 9.35E-04 |
| Chrnd          | 0.876 | 0.717 | 0.782 | 0.000 | 0.074 | 0.063 | 4.345 | 1.39E-03 |
| Lyzl4          | 1.456 | 2.054 | 2.445 | 0.000 | 0.515 | 0.000 | 4.335 | 1.70E-03 |
| Fam110d        | 2.818 | 3.037 | 4.067 | 0.221 | 0.549 | 0.835 | 4.328 | 4.60E-05 |
| Lad1           | 2.182 | 2.642 | 3.177 | 0.045 | 0.383 | 0.595 | 4.297 | 9.93E-05 |
| Krt13          | 2.509 | 2.823 | 3.171 | 0.194 | 0.605 | 0.367 | 4.296 | 2.40E-04 |
| Adcy7          | 3.373 | 3.577 | 4.403 | 0.561 | 0.785 | 0.976 | 4.206 | 3.11E-06 |
| Krt1           | 0.757 | 1.615 | 2.180 | 0.138 | 0.057 | 0.230 | 4.200 | 6.51E-04 |
| Tsppear        | 0.726 | 1.324 | 1.292 | 0.000 | 0.072 | 0.176 | 4.188 | 3.64E-04 |
| Acp5           | 3.628 | 3.650 | 4.464 | 0.694 | 0.489 | 1.319 | 4.178 | 6.63E-06 |
| Dsg2           | 2.038 | 2.413 | 3.372 | 0.217 | 0.319 | 0.595 | 4.171 | 1.64E-05 |

|                |       |       |       |       |       |       |       |          |
|----------------|-------|-------|-------|-------|-------|-------|-------|----------|
| Alx4           | 0.499 | 1.207 | 1.719 | 0.000 | 0.066 | 0.212 | 4.138 | 3.88E-03 |
| Casq2          | 0.482 | 0.221 | 0.352 | 0.000 | 0.059 | 0.000 | 4.122 | 8.99E-03 |
| Myh7           | 0.444 | 0.246 | 0.525 | 0.030 | 0.024 | 0.020 | 4.118 | 2.21E-04 |
| Gjb2           | 1.105 | 1.525 | 2.204 | 0.096 | 0.169 | 0.232 | 4.106 | 1.64E-05 |
| RGD1562660     | 3.214 | 3.481 | 4.163 | 1.343 | 0.000 | 0.000 | 4.095 | 1.74E-02 |
| Matn4          | 3.241 | 3.607 | 4.163 | 0.232 | 0.670 | 1.262 | 4.086 | 9.30E-05 |
| Ccdc180        | 0.444 | 0.675 | 0.803 | 0.072 | 0.059 | 0.000 | 4.085 | 2.12E-03 |
| Papln          | 0.938 | 0.895 | 1.391 | 0.073 | 0.108 | 0.092 | 4.074 | 8.00E-05 |
| Ggt5           | 4.096 | 4.643 | 5.420 | 0.294 | 1.622 | 0.747 | 4.069 | 1.50E-04 |
| Ankrd34c       | 0.371 | 1.251 | 0.442 | 0.000 | 0.115 | 0.049 | 4.062 | 1.09E-02 |
| Pcdh12         | 0.467 | 1.128 | 1.107 | 0.019 | 0.132 | 0.076 | 4.061 | 3.64E-04 |
| AABR07069837.1 | 1.410 | 1.709 | 1.702 | 0.000 | 0.397 | 0.000 | 4.058 | 4.91E-03 |
| Npas1          | 1.652 | 2.242 | 2.524 | 0.090 | 0.466 | 0.255 | 4.052 | 3.86E-05 |
| Zfp185         | 3.568 | 3.766 | 4.843 | 1.067 | 1.011 | 0.932 | 4.037 | 3.11E-06 |
| Zfp663         | 1.822 | 1.886 | 2.378 | 0.131 | 0.234 | 0.371 | 4.033 | 1.49E-04 |
| Bmpr1b         | 2.130 | 2.223 | 3.090 | 0.124 | 0.630 | 0.352 | 4.008 | 5.46E-04 |
| Dpy19l2        | 0.224 | 0.290 | 0.233 | 0.000 | 0.044 | 0.000 | 3.989 | 3.40E-02 |
| Pik3ap1        | 1.289 | 1.610 | 1.808 | 0.118 | 0.150 | 0.265 | 3.973 | 8.61E-05 |
| Egfm1          | 1.355 | 1.628 | 2.253 | 0.131 | 0.231 | 0.257 | 3.946 | 7.62E-05 |
| Kcng2          | 1.971 | 1.844 | 2.815 | 0.188 | 0.457 | 0.313 | 3.907 | 4.42E-06 |
| Npy1r          | 1.671 | 1.792 | 2.052 | 0.375 | 0.105 | 0.386 | 3.898 | 1.79E-05 |
| Dmrt2          | 0.242 | 0.392 | 0.773 | 0.000 | 0.000 | 0.090 | 3.891 | 6.55E-03 |
| Kcnk4          | 2.670 | 2.834 | 3.339 | 0.437 | 0.357 | 0.774 | 3.885 | 4.38E-05 |
| Bank1          | 0.986 | 1.063 | 0.968 | 0.135 | 0.311 | 0.260 | 3.875 | 4.21E-03 |
| Tmem106a       | 3.286 | 3.738 | 4.229 | 0.461 | 1.091 | 1.103 | 3.874 | 8.58E-05 |
| Gli1           | 0.349 | 0.476 | 0.756 | 0.068 | 0.000 | 0.046 | 3.874 | 9.19E-04 |
| Calca          | 4.787 | 5.074 | 5.927 | 1.175 | 2.282 | 2.196 | 3.865 | 4.68E-06 |
| Gsdmd          | 5.336 | 5.493 | 6.127 | 1.416 | 2.374 | 2.569 | 3.844 | 1.62E-05 |
| Klrg2          | 1.385 | 1.347 | 1.791 | 0.000 | 0.274 | 0.234 | 3.826 | 2.32E-03 |



|                |       |       |       |       |       |       |       |          |
|----------------|-------|-------|-------|-------|-------|-------|-------|----------|
| Gng11          | 2.328 | 2.649 | 3.054 | 0.167 | 0.803 | 0.393 | 3.819 | 1.28E-04 |
| Glt8d2         | 2.370 | 2.499 | 2.983 | 0.542 | 0.412 | 0.351 | 3.814 | 6.33E-05 |
| Plbd1          | 0.951 | 1.119 | 1.256 | 0.000 | 0.075 | 0.239 | 3.810 | 8.77E-04 |
| Capn8          | 1.792 | 2.560 | 2.188 | 0.099 | 0.462 | 0.423 | 3.803 | 5.34E-04 |
| Tex33          | 0.473 | 1.032 | 1.175 | 0.000 | 0.000 | 0.185 | 3.801 | 9.90E-03 |
| Flt4           | 0.701 | 1.330 | 1.424 | 0.017 | 0.098 | 0.250 | 3.792 | 4.26E-04 |
| Popdc3         | 2.473 | 2.706 | 3.306 | 0.486 | 0.635 | 0.381 | 3.788 | 1.90E-05 |
| Atp2b4         | 2.020 | 2.363 | 3.138 | 0.195 | 0.586 | 0.530 | 3.785 | 5.85E-05 |
| Rspo2          | 2.126 | 2.346 | 3.134 | 0.384 | 0.399 | 0.545 | 3.775 | 2.79E-05 |
| Cdh3           | 1.411 | 1.382 | 2.357 | 0.027 | 0.214 | 0.449 | 3.744 | 4.10E-04 |
| Baiap2l1       | 2.858 | 2.898 | 3.589 | 0.683 | 0.841 | 0.478 | 3.729 | 8.66E-06 |
| Mcf2           | 2.127 | 2.594 | 3.158 | 0.446 | 0.615 | 0.420 | 3.718 | 8.66E-06 |
| Btn1a1         | 0.643 | 0.759 | 1.022 | 0.071 | 0.126 | 0.037 | 3.708 | 2.14E-04 |
| LOC100912034   | 0.409 | 0.873 | 0.470 | 0.000 | 0.000 | 0.134 | 3.704 | 4.93E-02 |
| Grb7           | 1.294 | 1.822 | 1.784 | 0.155 | 0.376 | 0.127 | 3.671 | 6.34E-06 |
| Kcns3          | 1.203 | 1.647 | 2.547 | 0.143 | 0.322 | 0.358 | 3.659 | 2.59E-04 |
| Fgfr4          | 1.139 | 1.164 | 2.589 | 0.219 | 0.285 | 0.243 | 3.657 | 1.07E-03 |
| Hspb1          | 7.275 | 7.587 | 8.238 | 3.341 | 4.315 | 4.638 | 3.631 | 1.79E-05 |
| Wdfy4          | 0.183 | 0.437 | 0.267 | 0.018 | 0.000 | 0.055 | 3.621 | 1.63E-03 |
| LOC102554838   | 2.099 | 2.174 | 2.959 | 0.404 | 0.488 | 0.414 | 3.603 | 3.67E-04 |
| Gpr179         | 0.258 | 0.205 | 0.620 | 0.000 | 0.032 | 0.110 | 3.602 | 1.91E-02 |
| Tgm7l1         | 0.467 | 0.958 | 1.075 | 0.050 | 0.118 | 0.101 | 3.539 | 2.15E-03 |
| Melk           | 3.264 | 3.665 | 4.229 | 0.651 | 1.329 | 1.160 | 3.532 | 1.51E-05 |
| Kdelr3         | 5.999 | 5.882 | 7.036 | 2.305 | 2.815 | 3.464 | 3.529 | 8.66E-06 |
| Cstl1          | 1.330 | 1.985 | 2.304 | 0.264 | 0.582 | 0.000 | 3.529 | 5.36E-03 |
| Sash3          | 0.481 | 0.714 | 0.924 | 0.042 | 0.000 | 0.163 | 3.523 | 6.66E-03 |
| RGD1559714     | 0.403 | 0.627 | 0.829 | 0.000 | 0.181 | 0.000 | 3.523 | 3.88E-03 |
| AABR07068094.2 | 0.850 | 1.595 | 1.797 | 0.000 | 0.474 | 0.119 | 3.512 | 1.89E-02 |
| Foxa2          | 0.248 | 0.252 | 0.652 | 0.000 | 0.055 | 0.047 | 3.509 | 1.44E-02 |

|            |       |       |       |       |       |       |       |          |
|------------|-------|-------|-------|-------|-------|-------|-------|----------|
| Lamc2      | 3.867 | 4.091 | 4.162 | 0.966 | 1.275 | 1.409 | 3.493 | 9.05E-07 |
| Upk1b      | 0.736 | 1.614 | 1.836 | 0.119 | 0.074 | 0.387 | 3.475 | 5.40E-03 |
| Tex40      | 2.404 | 2.722 | 3.250 | 0.000 | 0.744 | 0.981 | 3.469 | 2.22E-03 |
| Tmc4       | 1.259 | 1.303 | 1.855 | 0.124 | 0.238 | 0.276 | 3.468 | 4.91E-04 |
| Trim16     | 2.708 | 2.841 | 3.530 | 0.714 | 0.771 | 0.705 | 3.468 | 1.83E-06 |
| Tacr2      | 0.676 | 0.835 | 1.367 | 0.068 | 0.121 | 0.166 | 3.453 | 1.09E-03 |
| Vav1       | 1.258 | 1.342 | 1.693 | 0.088 | 0.106 | 0.401 | 3.448 | 2.35E-03 |
| Cdh23      | 1.059 | 0.957 | 1.467 | 0.109 | 0.190 | 0.173 | 3.440 | 9.29E-05 |
| Scnn1b     | 0.370 | 0.626 | 0.797 | 0.000 | 0.125 | 0.072 | 3.425 | 7.72E-03 |
| Muc5b      | 0.112 | 0.229 | 0.334 | 0.008 | 0.036 | 0.023 | 3.407 | 1.65E-03 |
| Calr4      | 2.917 | 3.140 | 4.087 | 0.519 | 1.320 | 1.056 | 3.405 | 2.39E-04 |
| Slco1c1    | 1.513 | 1.641 | 1.585 | 0.162 | 0.147 | 0.412 | 3.397 | 2.59E-04 |
| Klc3       | 2.626 | 2.746 | 3.246 | 0.630 | 0.808 | 0.595 | 3.393 | 5.08E-06 |
| Znrf4      | 0.278 | 1.163 | 1.560 | 0.077 | 0.092 | 0.224 | 3.389 | 2.57E-03 |
| Acan       | 0.164 | 0.225 | 0.655 | 0.015 | 0.070 | 0.028 | 3.382 | 1.55E-03 |
| Pzp        | 0.092 | 0.524 | 0.605 | 0.025 | 0.000 | 0.097 | 3.372 | 1.56E-02 |
| Shh        | 0.297 | 0.589 | 0.805 | 0.056 | 0.000 | 0.111 | 3.366 | 3.02E-03 |
| Smpdl3b    | 3.367 | 3.508 | 4.275 | 0.522 | 1.425 | 1.397 | 3.356 | 2.19E-05 |
| Pgr        | 1.008 | 1.159 | 1.658 | 0.031 | 0.303 | 0.232 | 3.355 | 3.37E-04 |
| Card14     | 1.538 | 1.451 | 1.980 | 0.225 | 0.402 | 0.199 | 3.355 | 6.69E-05 |
| AC139642.1 | 2.360 | 2.248 | 3.218 | 0.715 | 0.132 | 0.805 | 3.347 | 1.32E-03 |
| LOC689757  | 0.716 | 1.248 | 1.656 | 0.130 | 0.229 | 0.068 | 3.327 | 1.60E-02 |
| Ptgis      | 1.001 | 1.368 | 1.799 | 0.070 | 0.163 | 0.433 | 3.322 | 8.64E-04 |
| Otop3      | 1.815 | 2.349 | 2.465 | 0.573 | 0.432 | 0.299 | 3.321 | 6.50E-05 |
| Wdr86      | 1.762 | 1.412 | 2.306 | 0.314 | 0.370 | 0.320 | 3.306 | 9.27E-05 |
| C1ql2      | 2.300 | 2.661 | 3.673 | 0.602 | 0.896 | 0.754 | 3.304 | 1.35E-04 |
| Bag3       | 5.458 | 5.637 | 6.017 | 1.803 | 2.843 | 3.053 | 3.303 | 8.74E-06 |
| Bik        | 3.065 | 2.825 | 3.846 | 0.578 | 1.184 | 0.945 | 3.302 | 9.04E-05 |
| B4galnt3   | 0.572 | 0.631 | 0.868 | 0.000 | 0.160 | 0.102 | 3.276 | 5.17E-04 |

|         |       |       |       |       |       |       |       |          |
|---------|-------|-------|-------|-------|-------|-------|-------|----------|
| Foxg1   | 0.170 | 0.236 | 0.414 | 0.000 | 0.044 | 0.037 | 3.273 | 9.62E-03 |
| Fam83a  | 1.672 | 1.957 | 2.782 | 0.344 | 0.423 | 0.580 | 3.271 | 1.59E-04 |
| Sh3bgr  | 5.781 | 5.506 | 5.668 | 2.744 | 3.051 | 1.786 | 3.262 | 5.33E-04 |
| Edaradd | 2.247 | 2.510 | 3.421 | 0.600 | 0.525 | 0.922 | 3.256 | 1.29E-03 |
| Btla    | 0.819 | 1.348 | 1.633 | 0.193 | 0.268 | 0.069 | 3.255 | 5.01E-03 |
| Scel    | 0.526 | 0.663 | 1.296 | 0.049 | 0.060 | 0.224 | 3.252 | 1.12E-02 |
| Plod1   | 5.487 | 5.908 | 6.191 | 1.965 | 3.142 | 3.193 | 3.228 | 4.38E-05 |
| Ly6l    | 2.316 | 2.674 | 3.329 | 0.271 | 0.640 | 0.951 | 3.223 | 3.69E-04 |
| Tulp1   | 0.613 | 0.821 | 1.103 | 0.000 | 0.000 | 0.309 | 3.221 | 2.59E-02 |
| Nlrp6   | 2.943 | 3.631 | 4.276 | 0.600 | 1.304 | 1.567 | 3.212 | 1.70E-03 |
| Mypn    | 0.191 | 0.251 | 0.374 | 0.000 | 0.051 | 0.040 | 3.211 | 8.29E-03 |
| Tmem37  | 1.218 | 1.676 | 2.047 | 0.216 | 0.398 | 0.282 | 3.210 | 2.18E-04 |
| Mro     | 3.237 | 3.299 | 4.517 | 0.690 | 1.991 | 0.954 | 3.192 | 6.48E-04 |
| Scd     | 3.752 | 4.047 | 4.739 | 1.434 | 1.685 | 1.570 | 3.173 | 7.08E-06 |
| Slc9a3  | 0.501 | 0.496 | 0.865 | 0.057 | 0.134 | 0.058 | 3.172 | 4.51E-04 |
| Cck     | 1.835 | 2.695 | 3.109 | 0.224 | 0.769 | 0.883 | 3.168 | 5.00E-03 |
| Wnk4    | 1.020 | 1.363 | 1.939 | 0.216 | 0.388 | 0.221 | 3.132 | 6.31E-05 |
| Tle6    | 1.699 | 1.719 | 2.439 | 0.100 | 0.283 | 0.792 | 3.125 | 1.54E-03 |
| Thbs4   | 2.047 | 2.316 | 2.647 | 0.401 | 0.640 | 0.663 | 3.098 | 1.75E-05 |
| Nlrp10  | 0.065 | 0.096 | 0.498 | 0.000 | 0.041 | 0.035 | 3.088 | 3.11E-02 |
| Cldn10  | 3.442 | 3.410 | 4.365 | 1.162 | 1.397 | 1.449 | 3.083 | 4.67E-05 |
| Dnai1   | 0.966 | 1.702 | 1.676 | 0.141 | 0.414 | 0.274 | 3.065 | 1.34E-03 |
| Myo5c   | 1.988 | 2.633 | 2.506 | 0.299 | 0.946 | 0.528 | 3.043 | 4.76E-04 |
| Esrp2   | 0.434 | 0.289 | 0.631 | 0.025 | 0.059 | 0.098 | 3.039 | 3.69E-04 |
| Fhl3    | 3.234 | 3.697 | 4.493 | 1.039 | 1.514 | 1.641 | 3.036 | 3.74E-05 |
| Ano5    | 1.137 | 1.159 | 1.252 | 0.188 | 0.173 | 0.277 | 3.034 | 1.22E-03 |
| Tekt4   | 0.334 | 1.020 | 1.231 | 0.221 | 0.093 | 0.078 | 3.029 | 1.14E-02 |
| Agmat   | 0.863 | 1.072 | 1.349 | 0.067 | 0.356 | 0.131 | 3.016 | 2.32E-03 |
| Lrrc3c  | 2.033 | 2.231 | 2.792 | 0.268 | 0.573 | 0.876 | 3.010 | 1.91E-04 |

|                |       |       |       |       |       |       |       |          |
|----------------|-------|-------|-------|-------|-------|-------|-------|----------|
| Cfap57         | 0.427 | 1.319 | 1.655 | 0.129 | 0.466 | 0.107 | 2.998 | 3.62E-03 |
| Ptpro          | 6.099 | 6.021 | 6.480 | 3.273 | 2.925 | 3.739 | 2.987 | 1.18E-05 |
| LOC100910996   | 6.359 | 6.243 | 6.756 | 3.712 | 3.478 | 3.538 | 2.984 | 1.83E-06 |
| Chrna5         | 2.373 | 2.633 | 3.438 | 0.621 | 0.979 | 0.929 | 2.982 | 1.94E-03 |
| Arhgef26       | 1.758 | 1.901 | 2.808 | 0.184 | 0.817 | 0.616 | 2.974 | 9.59E-04 |
| Tox2           | 0.638 | 0.858 | 1.322 | 0.047 | 0.161 | 0.259 | 2.972 | 1.58E-03 |
| Angpt4         | 0.813 | 0.947 | 0.794 | 0.172 | 0.000 | 0.214 | 2.972 | 5.00E-03 |
| LOC679342      | 3.331 | 3.177 | 4.176 | 0.853 | 1.517 | 1.462 | 2.970 | 6.84E-05 |
| Dmkn           | 1.519 | 2.121 | 2.688 | 0.463 | 0.863 | 0.750 | 2.964 | 8.00E-05 |
| Gata6          | 0.501 | 0.739 | 0.885 | 0.051 | 0.176 | 0.102 | 2.963 | 3.66E-03 |
| Mcam           | 6.448 | 6.335 | 7.044 | 3.221 | 3.678 | 4.239 | 2.962 | 3.85E-07 |
| Hs3st2         | 2.547 | 2.574 | 3.388 | 0.479 | 0.901 | 1.142 | 2.959 | 1.18E-04 |
| Procr          | 1.480 | 2.295 | 2.508 | 0.154 | 0.493 | 0.852 | 2.957 | 1.84E-03 |
| Adgrd1         | 0.447 | 0.560 | 1.133 | 0.072 | 0.166 | 0.107 | 2.955 | 2.53E-02 |
| Gdf6           | 0.968 | 1.036 | 1.777 | 0.031 | 0.450 | 0.260 | 2.951 | 6.09E-03 |
| Ii12rb2        | 2.007 | 2.027 | 2.291 | 0.581 | 0.465 | 0.481 | 2.940 | 1.60E-04 |
| Pla2g3         | 0.473 | 0.619 | 0.968 | 0.077 | 0.092 | 0.150 | 2.939 | 2.94E-03 |
| St6galnac2     | 0.297 | 0.865 | 1.234 | 0.111 | 0.000 | 0.265 | 2.923 | 1.57E-02 |
| Cela1          | 0.640 | 0.704 | 1.232 | 0.100 | 0.000 | 0.287 | 2.920 | 7.13E-03 |
| Ikzf3          | 0.478 | 0.491 | 0.751 | 0.000 | 0.116 | 0.143 | 2.919 | 4.86E-03 |
| Mum1l1         | 2.664 | 2.677 | 3.212 | 0.685 | 0.856 | 1.086 | 2.919 | 4.74E-06 |
| Stox1          | 0.703 | 0.798 | 1.317 | 0.143 | 0.172 | 0.180 | 2.917 | 2.34E-03 |
| Phf11b         | 3.851 | 3.839 | 4.552 | 1.318 | 1.595 | 2.013 | 2.910 | 6.09E-05 |
| Drd2           | 3.034 | 3.264 | 4.297 | 0.700 | 1.473 | 1.685 | 2.901 | 7.45E-04 |
| Slc43a1        | 0.964 | 1.343 | 2.086 | 0.215 | 0.194 | 0.530 | 2.857 | 8.21E-04 |
| AABR07050283.2 | 0.671 | 1.410 | 1.627 | 0.145 | 0.000 | 0.506 | 2.856 | 2.36E-02 |
| Wisp2          | 1.579 | 1.734 | 2.307 | 0.380 | 0.396 | 0.582 | 2.853 | 2.05E-03 |
| NEWGENE_2724   | 0.809 | 1.480 | 1.753 | 0.205 | 0.180 | 0.447 | 2.847 | 4.42E-04 |
| Atp8b3         | 0.605 | 0.660 | 0.881 | 0.045 | 0.277 | 0.046 | 2.845 | 1.21E-03 |

|                |       |       |       |       |       |       |       |          |
|----------------|-------|-------|-------|-------|-------|-------|-------|----------|
| RT1-DMa        | 5.335 | 5.508 | 6.095 | 2.818 | 3.207 | 2.880 | 2.843 | 6.63E-06 |
| Glp1r          | 0.315 | 0.485 | 0.584 | 0.081 | 0.072 | 0.034 | 2.839 | 2.95E-02 |
| Slc4a1         | 0.356 | 0.648 | 0.694 | 0.000 | 0.132 | 0.150 | 2.825 | 3.46E-02 |
| AABR07043276.1 | 3.698 | 4.025 | 4.511 | 1.579 | 1.608 | 1.913 | 2.821 | 6.10E-04 |
| Stab1          | 0.102 | 0.384 | 0.200 | 0.024 | 0.029 | 0.049 | 2.816 | 1.48E-02 |
| Unc45b         | 0.514 | 0.280 | 0.300 | 0.031 | 0.145 | 0.000 | 2.805 | 2.24E-02 |
| Cd40           | 0.741 | 1.368 | 1.391 | 0.000 | 0.188 | 0.501 | 2.764 | 2.17E-02 |
| Trpv4          | 0.361 | 0.434 | 0.785 | 0.056 | 0.067 | 0.138 | 2.761 | 4.51E-04 |
| Krt7           | 3.545 | 4.009 | 4.133 | 1.318 | 1.818 | 1.831 | 2.757 | 2.70E-05 |
| Cox6b2         | 3.373 | 3.540 | 3.497 | 1.367 | 1.157 | 1.355 | 2.754 | 2.23E-03 |
| Plekhg3        | 6.626 | 6.872 | 7.022 | 3.917 | 4.351 | 4.188 | 2.751 | 6.64E-08 |
| Ankrd1         | 0.713 | 0.991 | 1.044 | 0.071 | 0.318 | 0.143 | 2.744 | 9.64E-03 |
| Pmaip1         | 5.295 | 5.681 | 6.255 | 2.391 | 3.543 | 3.473 | 2.744 | 4.60E-05 |
| Slc30a2        | 2.176 | 2.213 | 2.638 | 0.504 | 0.966 | 0.563 | 2.743 | 5.46E-06 |
| RGD1311892     | 0.902 | 1.030 | 1.522 | 0.177 | 0.272 | 0.284 | 2.730 | 1.04E-03 |
| Klhl4          | 1.772 | 1.727 | 1.679 | 0.318 | 0.657 | 0.330 | 2.718 | 1.97E-04 |
| Fam20a         | 0.723 | 0.945 | 1.049 | 0.000 | 0.273 | 0.260 | 2.716 | 3.08E-03 |
| Aldh1a2        | 2.323 | 2.366 | 2.602 | 0.593 | 0.478 | 1.074 | 2.711 | 8.87E-04 |
| Arhgef16       | 0.100 | 0.160 | 0.355 | 0.000 | 0.075 | 0.022 | 2.709 | 3.73E-02 |
| Lmod3          | 0.966 | 0.896 | 1.167 | 0.296 | 0.189 | 0.108 | 2.707 | 5.57E-03 |
| Csf2rb         | 0.785 | 1.146 | 1.644 | 0.135 | 0.356 | 0.305 | 2.699 | 5.02E-03 |
| Sbspon         | 1.329 | 1.212 | 2.382 | 0.100 | 0.592 | 0.575 | 2.696 | 5.48E-03 |
| Aox1           | 4.295 | 4.600 | 4.540 | 1.297 | 2.249 | 2.263 | 2.687 | 6.87E-04 |
| Atg9b          | 0.242 | 0.351 | 0.410 | 0.091 | 0.000 | 0.061 | 2.680 | 9.34E-03 |
| Aim1l          | 0.103 | 0.228 | 0.107 | 0.031 | 0.037 | 0.000 | 2.672 | 2.78E-02 |
| Phf11          | 2.518 | 2.494 | 2.556 | 0.709 | 0.870 | 0.848 | 2.659 | 4.00E-04 |
| Rem1           | 0.919 | 0.967 | 1.393 | 0.172 | 0.071 | 0.425 | 2.658 | 8.87E-03 |
| LOC685680      | 0.546 | 1.041 | 1.754 | 0.094 | 0.320 | 0.355 | 2.650 | 1.43E-02 |
| Dennd2d        | 0.320 | 0.553 | 0.637 | 0.061 | 0.144 | 0.062 | 2.648 | 3.44E-03 |

|                |       |       |       |       |       |       |       |          |
|----------------|-------|-------|-------|-------|-------|-------|-------|----------|
| Dgkb           | 2.793 | 2.628 | 3.598 | 0.994 | 1.106 | 1.281 | 2.638 | 1.25E-05 |
| LOC102547811   | 3.082 | 3.365 | 3.720 | 1.204 | 1.215 | 1.578 | 2.620 | 1.01E-03 |
| Lypd3          | 0.397 | 0.494 | 0.526 | 0.000 | 0.070 | 0.171 | 2.620 | 2.15E-02 |
| Dgkk           | 0.492 | 1.107 | 1.711 | 0.146 | 0.306 | 0.022 | 2.615 | 9.67E-03 |
| LOC102551901   | 4.907 | 5.096 | 4.621 | 2.675 | 2.800 | 1.791 | 2.612 | 3.36E-04 |
| LOC497899      | 2.594 | 3.266 | 3.811 | 0.905 | 1.641 | 1.249 | 2.609 | 1.24E-04 |
| Gsdma          | 3.687 | 3.698 | 3.959 | 1.440 | 1.780 | 1.660 | 2.603 | 9.05E-07 |
| Dnajc22        | 2.482 | 2.822 | 3.205 | 0.598 | 1.157 | 1.268 | 2.586 | 1.19E-04 |
| Adgrg6         | 3.029 | 3.253 | 4.013 | 0.834 | 1.677 | 1.707 | 2.581 | 3.66E-03 |
| Tjp3           | 0.874 | 1.251 | 1.479 | 0.179 | 0.278 | 0.395 | 2.581 | 4.21E-04 |
| Irf8           | 0.493 | 1.370 | 1.810 | 0.135 | 0.272 | 0.515 | 2.575 | 1.50E-02 |
| Mc4r           | 0.495 | 0.415 | 0.761 | 0.060 | 0.073 | 0.176 | 2.570 | 1.83E-02 |
| Cngb1          | 1.155 | 1.128 | 1.987 | 0.112 | 0.219 | 0.719 | 2.569 | 6.49E-03 |
| Fam83g         | 1.662 | 2.260 | 2.544 | 0.189 | 0.919 | 0.856 | 2.567 | 1.71E-03 |
| Pik3r6         | 0.569 | 1.038 | 0.845 | 0.178 | 0.308 | 0.032 | 2.559 | 4.15E-03 |
| Fam126a        | 4.664 | 4.750 | 5.509 | 2.377 | 2.764 | 2.847 | 2.549 | 3.45E-04 |
| Gpr149         | 2.124 | 2.274 | 2.954 | 0.473 | 1.052 | 0.970 | 2.542 | 1.65E-04 |
| Map3k6         | 2.664 | 2.907 | 3.447 | 0.949 | 1.142 | 1.365 | 2.538 | 2.04E-06 |
| Hmgn5b         | 4.262 | 4.910 | 5.732 | 1.971 | 2.241 | 3.611 | 2.528 | 4.13E-03 |
| Tmem54         | 0.835 | 0.898 | 1.726 | 0.381 | 0.276 | 0.174 | 2.527 | 1.07E-03 |
| Fosb           | 3.314 | 3.653 | 4.159 | 1.967 | 1.539 | 1.303 | 2.527 | 5.85E-05 |
| Nckap1l        | 0.836 | 1.325 | 1.210 | 0.223 | 0.206 | 0.425 | 2.519 | 7.89E-04 |
| Gipr           | 2.128 | 2.205 | 2.428 | 0.469 | 0.894 | 0.815 | 2.513 | 9.78E-06 |
| Prss12         | 1.035 | 0.754 | 1.174 | 0.190 | 0.227 | 0.268 | 2.511 | 8.37E-04 |
| AABR07060473.1 | 1.991 | 2.094 | 2.527 | 0.897 | 0.842 | 0.306 | 2.510 | 7.34E-03 |
| Cyp2d4         | 0.953 | 1.453 | 1.440 | 0.261 | 0.249 | 0.440 | 2.508 | 1.91E-04 |
| Igsf1          | 1.495 | 1.493 | 1.679 | 0.499 | 0.525 | 0.203 | 2.506 | 1.08E-03 |
| Sec31b         | 1.246 | 1.559 | 1.396 | 0.228 | 0.461 | 0.413 | 2.505 | 2.93E-05 |
| Asb2           | 0.532 | 1.036 | 1.538 | 0.137 | 0.399 | 0.225 | 2.502 | 2.32E-03 |

|                |       |       |       |       |       |       |       |          |
|----------------|-------|-------|-------|-------|-------|-------|-------|----------|
| Asic2          | 4.138 | 4.323 | 4.669 | 1.976 | 2.398 | 2.154 | 2.487 | 1.69E-06 |
| Prokr1         | 0.246 | 0.305 | 0.591 | 0.068 | 0.081 | 0.069 | 2.477 | 1.61E-02 |
| Tnnt1          | 1.093 | 1.880 | 1.528 | 0.155 | 0.591 | 0.444 | 2.471 | 7.38E-03 |
| Tcf7l1         | 2.576 | 3.117 | 3.769 | 0.837 | 1.518 | 1.533 | 2.466 | 7.94E-04 |
| Trpc6          | 2.707 | 3.076 | 3.535 | 1.004 | 1.371 | 1.427 | 2.464 | 4.10E-04 |
| Sult1a1        | 1.649 | 2.202 | 2.481 | 0.218 | 0.838 | 0.942 | 2.464 | 3.20E-03 |
| Pmel           | 2.388 | 3.110 | 3.586 | 0.614 | 0.978 | 1.878 | 2.464 | 6.43E-03 |
| Phldb3         | 0.931 | 0.696 | 1.155 | 0.104 | 0.442 | 0.106 | 2.447 | 7.96E-03 |
| Fam46c         | 1.099 | 1.161 | 1.282 | 0.106 | 0.353 | 0.433 | 2.442 | 8.77E-03 |
| Greb1          | 2.444 | 2.980 | 2.434 | 0.710 | 1.250 | 0.940 | 2.441 | 1.12E-04 |
| AABR07073181.1 | 3.090 | 3.181 | 3.754 | 0.695 | 1.511 | 1.924 | 2.440 | 1.50E-02 |
| Prokr2         | 1.456 | 1.817 | 1.103 | 0.318 | 0.666 | 0.244 | 2.433 | 5.90E-03 |
| Hspa1a         | 5.023 | 5.090 | 5.837 | 2.362 | 1.459 | 4.137 | 2.429 | 3.11E-02 |
| Thrb           | 3.593 | 3.570 | 4.583 | 1.842 | 2.033 | 1.743 | 2.425 | 2.57E-05 |
| LOC103690141   | 2.009 | 2.044 | 3.083 | 0.698 | 1.151 | 0.687 | 2.419 | 4.33E-04 |
| Faim2          | 5.566 | 5.504 | 5.172 | 3.219 | 3.421 | 2.673 | 2.413 | 7.35E-04 |
| Cldn3          | 0.175 | 0.285 | 0.610 | 0.063 | 0.075 | 0.064 | 2.413 | 2.00E-02 |
| Tmem173        | 3.322 | 3.841 | 4.351 | 1.251 | 2.305 | 1.811 | 2.412 | 4.49E-04 |
| Gpr101         | 0.712 | 0.653 | 1.343 | 0.187 | 0.413 | 0.050 | 2.410 | 1.86E-02 |
| Clec2d2        | 0.977 | 1.176 | 1.762 | 0.149 | 0.399 | 0.537 | 2.404 | 2.51E-03 |
| Cmtm8          | 1.287 | 1.356 | 1.473 | 0.188 | 0.501 | 0.429 | 2.400 | 6.24E-04 |
| Gpr160         | 1.018 | 1.107 | 1.468 | 0.079 | 0.565 | 0.296 | 2.396 | 3.26E-03 |
| Upb1           | 1.263 | 1.986 | 1.725 | 0.102 | 0.774 | 0.604 | 2.378 | 3.44E-03 |
| Batf           | 0.531 | 1.148 | 1.073 | 0.000 | 0.155 | 0.465 | 2.376 | 3.37E-02 |
| Rp11           | 0.250 | 0.182 | 0.343 | 0.016 | 0.059 | 0.082 | 2.374 | 3.31E-02 |
| Lyve1          | 0.893 | 1.613 | 1.373 | 0.322 | 0.545 | 0.215 | 2.370 | 6.60E-03 |
| Il25           | 0.893 | 0.909 | 1.202 | 0.291 | 0.342 | 0.105 | 2.360 | 9.84E-03 |
| Cntnap2        | 6.754 | 6.735 | 7.020 | 5.280 | 4.844 | 2.702 | 2.358 | 2.93E-03 |
| Tmem255a       | 3.763 | 3.776 | 4.042 | 1.747 | 1.834 | 2.010 | 2.356 | 1.64E-05 |

|                |       |       |       |       |       |       |       |          |
|----------------|-------|-------|-------|-------|-------|-------|-------|----------|
| Pitx3          | 1.129 | 1.745 | 2.330 | 0.395 | 0.456 | 0.792 | 2.355 | 8.17E-03 |
| Fndc3c1        | 1.201 | 1.054 | 2.080 | 0.307 | 0.555 | 0.494 | 2.349 | 3.10E-02 |
| Mb21d1         | 1.371 | 1.707 | 2.476 | 0.259 | 0.570 | 0.958 | 2.348 | 3.44E-03 |
| Clnk           | 1.101 | 1.409 | 1.598 | 0.206 | 0.456 | 0.618 | 2.348 | 2.89E-03 |
| Sytl3          | 0.569 | 0.736 | 0.703 | 0.147 | 0.120 | 0.197 | 2.324 | 4.10E-04 |
| Traf3ip2       | 2.412 | 3.058 | 3.322 | 0.634 | 1.471 | 1.498 | 2.317 | 9.54E-04 |
| Eya2           | 2.734 | 3.478 | 4.043 | 0.963 | 1.516 | 2.116 | 2.307 | 3.09E-03 |
| Parp3          | 4.076 | 4.698 | 4.949 | 1.817 | 2.640 | 2.940 | 2.301 | 1.04E-04 |
| Cacna1h        | 1.226 | 1.466 | 2.203 | 0.366 | 0.506 | 0.706 | 2.301 | 4.34E-04 |
| Ccdc158        | 2.199 | 2.929 | 3.357 | 0.885 | 1.236 | 1.458 | 2.299 | 2.24E-04 |
| Hyal1          | 3.341 | 3.996 | 3.971 | 1.323 | 2.228 | 1.935 | 2.290 | 7.85E-03 |
| Pde11a         | 1.183 | 1.111 | 1.812 | 0.343 | 0.709 | 0.691 | 2.273 | 8.11E-03 |
| Atoh1          | 1.085 | 1.731 | 2.301 | 0.455 | 0.578 | 0.707 | 2.262 | 1.08E-03 |
| Igsf9          | 2.061 | 2.152 | 2.971 | 0.705 | 1.143 | 0.958 | 2.260 | 5.96E-04 |
| Pram1          | 0.542 | 0.488 | 0.734 | 0.167 | 0.135 | 0.112 | 2.257 | 8.96E-03 |
| Arhgef19       | 1.189 | 1.177 | 1.597 | 0.184 | 0.426 | 0.564 | 2.255 | 8.64E-04 |
| LOC100910419   | 0.332 | 0.980 | 0.797 | 0.125 | 0.149 | 0.241 | 2.244 | 1.64E-02 |
| Arhgap25       | 0.421 | 0.524 | 1.297 | 0.160 | 0.156 | 0.282 | 2.243 | 1.12E-02 |
| Fam110c        | 0.239 | 0.432 | 0.429 | 0.113 | 0.093 | 0.039 | 2.239 | 1.34E-02 |
| Cyp4v3         | 3.511 | 4.279 | 4.437 | 1.095 | 2.354 | 2.705 | 2.238 | 2.64E-03 |
| AABR07043358.1 | 4.563 | 4.997 | 5.375 | 2.570 | 3.140 | 3.102 | 2.226 | 5.14E-04 |
| AABR07015687.1 | 1.341 | 1.644 | 1.773 | 0.000 | 0.624 | 0.828 | 2.226 | 2.11E-02 |
| Crispld2       | 4.576 | 5.064 | 5.286 | 2.264 | 3.261 | 3.523 | 2.224 | 1.05E-04 |
| Grm2           | 2.272 | 2.146 | 3.310 | 0.839 | 1.122 | 1.293 | 2.222 | 3.24E-04 |
| Mreg           | 3.769 | 3.907 | 4.109 | 1.677 | 2.220 | 1.948 | 2.216 | 1.13E-06 |
| Gpr132         | 0.625 | 0.999 | 1.394 | 0.227 | 0.226 | 0.396 | 2.214 | 6.31E-03 |
| Susd5          | 0.581 | 0.765 | 0.874 | 0.162 | 0.193 | 0.216 | 2.207 | 3.60E-02 |
| Trpv1          | 1.070 | 1.023 | 1.565 | 0.309 | 0.342 | 0.474 | 2.206 | 8.64E-04 |
| Rab26          | 2.510 | 2.739 | 3.369 | 0.914 | 1.390 | 1.472 | 2.202 | 8.33E-05 |



|                |       |       |       |       |       |       |       |          |
|----------------|-------|-------|-------|-------|-------|-------|-------|----------|
| Lsmem2         | 2.188 | 2.662 | 2.447 | 0.827 | 1.160 | 0.907 | 2.194 | 1.93E-04 |
| Rbpms          | 3.160 | 3.952 | 4.764 | 0.969 | 2.238 | 2.520 | 2.187 | 1.49E-02 |
| Six3           | 0.533 | 0.956 | 1.646 | 0.213 | 0.138 | 0.479 | 2.172 | 1.89E-02 |
| Ltbp4          | 1.682 | 1.830 | 2.350 | 0.482 | 0.785 | 0.896 | 2.171 | 1.91E-04 |
| Tmem45b        | 0.621 | 0.568 | 0.599 | 0.069 | 0.202 | 0.201 | 2.158 | 2.14E-02 |
| Ccdc148        | 1.393 | 1.269 | 1.781 | 0.377 | 0.692 | 0.728 | 2.152 | 4.90E-04 |
| AABR07000740.1 | 7.960 | 8.121 | 8.497 | 6.017 | 5.869 | 6.321 | 2.141 | 1.09E-04 |
| Nod2           | 0.144 | 0.681 | 0.611 | 0.054 | 0.107 | 0.143 | 2.140 | 4.56E-02 |
| Epha10         | 2.609 | 2.820 | 3.470 | 1.172 | 1.506 | 1.259 | 2.139 | 1.93E-04 |
| Aloxe3         | 5.280 | 5.324 | 6.059 | 3.555 | 3.803 | 3.195 | 2.130 | 8.66E-06 |
| Wnt16          | 1.523 | 1.840 | 2.036 | 0.292 | 0.674 | 0.941 | 2.128 | 5.87E-03 |
| Slc35g1        | 1.437 | 1.474 | 2.161 | 0.543 | 0.548 | 0.698 | 2.127 | 1.36E-02 |
| Tnfsf9         | 0.722 | 1.334 | 1.600 | 0.391 | 0.289 | 0.459 | 2.126 | 1.55E-02 |
| Mybpc2         | 1.553 | 1.969 | 1.996 | 0.601 | 0.952 | 0.410 | 2.124 | 8.21E-04 |
| Ggh            | 6.571 | 6.561 | 7.070 | 4.528 | 4.917 | 4.561 | 2.121 | 3.85E-07 |
| Hmgn5          | 5.739 | 4.998 | 5.791 | 3.626 | 3.868 | 2.992 | 2.117 | 1.07E-03 |
| Prss35         | 1.676 | 1.670 | 2.247 | 0.492 | 0.754 | 0.844 | 2.112 | 8.00E-05 |
| Morc4          | 4.014 | 4.291 | 4.690 | 2.365 | 2.640 | 2.619 | 2.107 | 1.05E-04 |
| Slc9a2         | 1.714 | 1.986 | 2.064 | 0.769 | 0.913 | 0.415 | 2.107 | 9.19E-04 |
| Hspb2          | 2.194 | 2.298 | 2.723 | 1.132 | 0.558 | 1.132 | 2.107 | 6.07E-03 |
| Ush1g          | 1.576 | 2.003 | 2.145 | 0.928 | 0.681 | 0.440 | 2.106 | 1.53E-03 |
| Alk            | 0.965 | 1.144 | 1.465 | 0.190 | 0.473 | 0.471 | 2.104 | 2.34E-03 |
| Pnma1          | 1.586 | 1.975 | 2.345 | 0.424 | 0.912 | 0.910 | 2.101 | 1.91E-03 |
| Cited1         | 5.636 | 5.416 | 6.284 | 3.703 | 3.466 | 4.368 | 2.090 | 1.01E-03 |
| Arhgef38       | 0.539 | 0.421 | 0.891 | 0.061 | 0.276 | 0.178 | 2.083 | 4.46E-02 |
| Stbd1          | 4.009 | 3.997 | 4.760 | 2.035 | 2.534 | 2.669 | 2.082 | 3.59E-05 |
| Fam81a         | 3.224 | 3.301 | 4.292 | 1.743 | 1.893 | 2.108 | 2.071 | 3.24E-04 |
| AABR07043453.1 | 4.541 | 4.502 | 4.953 | 2.982 | 2.142 | 2.943 | 2.060 | 7.21E-03 |
| Sqrdl          | 3.452 | 3.426 | 3.859 | 1.085 | 2.012 | 2.329 | 2.059 | 3.12E-03 |

|                |       |       |       |       |       |       |       |          |
|----------------|-------|-------|-------|-------|-------|-------|-------|----------|
| Shcbp1l        | 0.902 | 0.903 | 0.917 | 0.123 | 0.348 | 0.351 | 2.058 | 2.15E-03 |
| Rn60_20_0054.5 | 3.451 | 3.806 | 4.359 | 1.791 | 2.183 | 2.362 | 2.052 | 2.89E-03 |
| AABR07043389.1 | 3.872 | 3.277 | 4.667 | 2.145 | 1.288 | 2.832 | 2.041 | 1.05E-02 |
| Btc            | 2.063 | 2.191 | 3.053 | 0.955 | 1.167 | 1.137 | 2.040 | 3.47E-04 |
| LOC363337      | 5.451 | 5.759 | 6.348 | 4.099 | 3.694 | 3.905 | 2.037 | 1.12E-04 |
| Prvt4          | 1.235 | 1.505 | 1.953 | 0.469 | 0.517 | 0.706 | 2.033 | 1.47E-03 |
| Synpo2l        | 1.310 | 1.748 | 2.055 | 0.539 | 0.757 | 0.618 | 2.032 | 1.03E-03 |
| Fam115c        | 1.543 | 1.538 | 1.952 | 0.514 | 0.536 | 0.802 | 2.029 | 1.89E-02 |
| Ngfr           | 4.715 | 4.817 | 5.777 | 3.066 | 3.244 | 3.428 | 2.025 | 6.26E-04 |
| Exnef          | 1.608 | 2.001 | 2.744 | 0.553 | 0.986 | 1.148 | 2.025 | 2.14E-03 |
| Sntg1          | 1.068 | 1.457 | 1.387 | 0.391 | 0.457 | 0.475 | 2.025 | 3.65E-03 |
| Ppp1r13l       | 2.086 | 2.759 | 3.249 | 0.937 | 1.515 | 1.307 | 2.023 | 3.00E-03 |
| Plpp4          | 1.641 | 1.950 | 2.475 | 0.605 | 0.956 | 0.892 | 2.023 | 1.71E-03 |
| Cdr2           | 5.589 | 5.916 | 6.424 | 3.484 | 3.788 | 4.688 | 2.022 | 1.56E-04 |
| Agtr1a         | 1.701 | 1.964 | 2.762 | 0.597 | 0.933 | 1.183 | 2.011 | 9.63E-03 |
| Eps8l1         | 0.644 | 1.059 | 1.297 | 0.293 | 0.272 | 0.395 | 2.009 | 2.13E-03 |
| Lin7b          | 5.447 | 5.160 | 6.017 | 3.672 | 3.717 | 3.454 | 2.009 | 3.50E-04 |
| Prom2          | 1.502 | 1.607 | 2.106 | 0.615 | 0.659 | 0.714 | 2.009 | 6.33E-05 |
| Hsph1          | 8.078 | 7.998 | 8.404 | 5.940 | 5.893 | 6.612 | 2.007 | 1.73E-05 |
| Robo3          | 0.789 | 1.408 | 1.121 | 0.162 | 0.634 | 0.299 | 1.998 | 9.63E-03 |
| Htr2c          | 1.771 | 2.275 | 2.384 | 0.347 | 1.173 | 1.134 | 1.991 | 2.76E-03 |
| Dll4           | 1.465 | 1.543 | 2.308 | 0.428 | 0.591 | 1.045 | 1.987 | 7.71E-04 |
| Slit1          | 0.520 | 0.734 | 0.816 | 0.082 | 0.266 | 0.290 | 1.978 | 4.68E-02 |
| Tap1           | 4.742 | 5.248 | 5.804 | 3.140 | 3.918 | 3.863 | 1.973 | 1.74E-05 |
| Mmd2           | 3.202 | 3.300 | 4.010 | 1.720 | 2.096 | 1.830 | 1.966 | 1.10E-04 |
| Slc26a9        | 0.237 | 0.549 | 0.570 | 0.027 | 0.183 | 0.180 | 1.956 | 2.81E-02 |
| Scml4          | 1.450 | 1.709 | 2.295 | 0.502 | 0.826 | 0.897 | 1.949 | 3.42E-03 |
| Arhgef15       | 1.504 | 1.775 | 2.040 | 0.640 | 0.949 | 0.453 | 1.947 | 1.12E-03 |
| Pbx4           | 2.356 | 2.791 | 2.939 | 1.262 | 1.422 | 1.127 | 1.943 | 5.46E-04 |

|                |       |       |       |       |       |       |       |          |
|----------------|-------|-------|-------|-------|-------|-------|-------|----------|
| Neto1          | 2.773 | 2.800 | 3.443 | 1.094 | 1.432 | 1.956 | 1.940 | 3.53E-04 |
| Dusp13         | 1.210 | 1.415 | 0.929 | 0.303 | 0.623 | 0.134 | 1.936 | 1.23E-02 |
| Creb3l1        | 4.709 | 5.195 | 5.820 | 2.660 | 3.578 | 3.918 | 1.932 | 3.36E-04 |
| Pkd1l1         | 0.271 | 0.436 | 0.372 | 0.125 | 0.061 | 0.114 | 1.932 | 1.61E-02 |
| Stx11          | 1.406 | 1.296 | 2.020 | 0.169 | 0.890 | 0.748 | 1.919 | 2.54E-02 |
| Phactr2        | 3.964 | 4.176 | 4.431 | 2.052 | 2.480 | 2.865 | 1.916 | 1.09E-04 |
| Slc16a14       | 5.009 | 5.179 | 5.841 | 3.141 | 3.597 | 3.795 | 1.916 | 1.02E-05 |
| Mal            | 0.965 | 1.579 | 1.679 | 0.681 | 0.350 | 0.511 | 1.913 | 7.37E-03 |
| Bend4          | 3.354 | 3.625 | 4.513 | 1.950 | 2.131 | 2.581 | 1.911 | 2.02E-02 |
| Zap70          | 1.382 | 2.038 | 2.027 | 0.621 | 0.949 | 0.659 | 1.910 | 8.19E-03 |
| Lmo2           | 5.328 | 5.430 | 6.093 | 3.468 | 3.706 | 4.205 | 1.906 | 2.59E-05 |
| Cys1           | 2.258 | 2.400 | 2.878 | 1.031 | 1.173 | 1.317 | 1.902 | 2.18E-04 |
| Alpk2          | 0.544 | 0.631 | 0.852 | 0.115 | 0.231 | 0.299 | 1.898 | 1.48E-03 |
| Lck            | 3.508 | 3.765 | 4.353 | 1.655 | 2.359 | 2.622 | 1.898 | 1.36E-04 |
| Nradd          | 3.212 | 3.957 | 4.267 | 1.801 | 2.346 | 2.431 | 1.896 | 1.58E-03 |
| Gprc5a         | 1.495 | 1.773 | 2.294 | 0.333 | 1.085 | 0.860 | 1.893 | 2.15E-02 |
| Nuak2          | 3.016 | 3.503 | 4.159 | 1.463 | 2.079 | 2.396 | 1.891 | 2.94E-03 |
| Itpr1l1        | 1.825 | 2.396 | 2.622 | 0.764 | 1.156 | 1.190 | 1.889 | 1.79E-03 |
| Dnaaf3         | 1.660 | 2.171 | 2.032 | 0.256 | 1.240 | 0.884 | 1.889 | 2.79E-02 |
| Whrn           | 2.427 | 2.613 | 3.301 | 1.116 | 1.362 | 1.701 | 1.886 | 3.69E-04 |
| Lrrc38         | 2.582 | 2.688 | 2.725 | 1.121 | 1.526 | 1.196 | 1.883 | 1.09E-04 |
| Rn60_20_0054.3 | 6.398 | 7.451 | 7.815 | 3.784 | 6.172 | 5.648 | 1.882 | 2.38E-02 |
| C6             | 0.731 | 0.856 | 1.000 | 0.306 | 0.194 | 0.349 | 1.874 | 2.15E-03 |
| Ar             | 1.109 | 0.979 | 1.573 | 0.478 | 0.317 | 0.534 | 1.874 | 3.98E-03 |
| Accsl          | 0.465 | 0.547 | 0.708 | 0.149 | 0.233 | 0.151 | 1.873 | 6.55E-03 |
| Lhx3           | 1.319 | 1.824 | 2.137 | 0.325 | 0.809 | 1.008 | 1.863 | 1.76E-02 |
| Cilp2          | 0.778 | 1.199 | 1.640 | 0.311 | 0.362 | 0.662 | 1.861 | 5.75E-03 |
| Fibin          | 0.588 | 1.008 | 1.198 | 0.152 | 0.445 | 0.382 | 1.858 | 4.78E-03 |
| Mboat7l1       | 6.502 | 6.629 | 7.260 | 4.900 | 4.973 | 5.092 | 1.855 | 2.44E-06 |

|                |       |       |       |       |       |       |       |          |
|----------------|-------|-------|-------|-------|-------|-------|-------|----------|
| Herc6          | 4.678 | 4.898 | 5.466 | 2.548 | 3.583 | 3.650 | 1.851 | 8.59E-04 |
| Tmem252        | 0.393 | 0.780 | 0.927 | 0.113 | 0.198 | 0.368 | 1.850 | 2.35E-02 |
| Cd164l2        | 3.699 | 3.735 | 4.390 | 2.542 | 1.886 | 2.434 | 1.848 | 7.45E-04 |
| Pik3r5         | 0.847 | 1.153 | 1.503 | 0.395 | 0.446 | 0.459 | 1.844 | 2.15E-03 |
| Chst8          | 3.183 | 3.226 | 3.587 | 1.212 | 1.641 | 2.414 | 1.841 | 4.50E-04 |
| Scn10a         | 3.071 | 3.464 | 3.935 | 1.222 | 1.909 | 2.555 | 1.841 | 5.80E-03 |
| Ociad2         | 6.900 | 6.663 | 6.943 | 5.023 | 5.221 | 4.872 | 1.829 | 1.79E-05 |
| Rbm46          | 2.542 | 3.125 | 3.677 | 1.147 | 1.786 | 2.094 | 1.826 | 1.45E-02 |
| Troap          | 1.565 | 1.818 | 2.264 | 0.576 | 0.965 | 0.915 | 1.824 | 8.45E-03 |
| Cyb5rl         | 1.652 | 1.957 | 2.108 | 0.463 | 1.169 | 0.918 | 1.820 | 8.77E-03 |
| Bst2           | 8.336 | 8.860 | 9.140 | 5.723 | 7.306 | 7.549 | 1.812 | 1.28E-02 |
| Lrrc46         | 2.917 | 2.969 | 3.550 | 1.873 | 1.640 | 1.562 | 1.805 | 1.69E-04 |
| PVR            | 3.708 | 4.353 | 4.849 | 2.026 | 2.997 | 2.997 | 1.803 | 2.85E-03 |
| AABR07040840.1 | 4.122 | 5.068 | 4.496 | 2.853 | 3.244 | 2.703 | 1.800 | 1.03E-03 |
| Hspa1b         | 6.078 | 6.161 | 6.988 | 3.862 | 4.419 | 5.440 | 1.799 | 8.85E-03 |
| Stom           | 3.946 | 4.632 | 5.252 | 2.352 | 3.076 | 3.501 | 1.783 | 2.67E-03 |
| Zmynd15        | 0.769 | 1.301 | 1.432 | 0.236 | 0.640 | 0.469 | 1.779 | 1.13E-02 |
| Etv4           | 3.917 | 4.076 | 5.007 | 2.263 | 2.745 | 3.136 | 1.778 | 1.21E-03 |
| Micb           | 2.048 | 2.497 | 2.828 | 0.889 | 1.540 | 1.191 | 1.773 | 3.99E-03 |
| Fam65b         | 2.552 | 2.475 | 3.318 | 1.531 | 1.527 | 1.316 | 1.772 | 3.62E-04 |
| Vgll2          | 1.081 | 1.202 | 1.465 | 0.451 | 0.408 | 0.585 | 1.767 | 8.81E-03 |
| Dmrta1         | 0.145 | 0.256 | 0.268 | 0.031 | 0.112 | 0.063 | 1.760 | 4.80E-02 |
| Pla2g4e        | 1.846 | 2.149 | 2.961 | 0.926 | 1.319 | 1.233 | 1.759 | 8.58E-04 |
| Itgb7          | 0.487 | 0.691 | 1.093 | 0.134 | 0.267 | 0.402 | 1.759 | 3.05E-02 |
| Cpq            | 3.834 | 3.845 | 4.445 | 1.958 | 2.880 | 2.562 | 1.757 | 1.15E-03 |
| Cyp27b1        | 0.753 | 1.116 | 1.412 | 0.334 | 0.463 | 0.464 | 1.753 | 7.21E-03 |
| Rel            | 2.408 | 2.852 | 3.467 | 1.582 | 1.576 | 1.597 | 1.751 | 1.15E-03 |
| Rhpn1          | 4.966 | 5.175 | 5.804 | 3.509 | 4.153 | 3.398 | 1.743 | 4.53E-05 |
| Cfap161        | 1.465 | 1.369 | 2.324 | 0.490 | 0.797 | 1.023 | 1.741 | 1.09E-02 |

|              |       |       |       |       |       |       |       |          |
|--------------|-------|-------|-------|-------|-------|-------|-------|----------|
| RGD1562726   | 1.526 | 1.841 | 1.910 | 0.507 | 1.092 | 0.716 | 1.740 | 2.94E-02 |
| Npr1         | 3.698 | 3.635 | 4.296 | 1.685 | 2.377 | 2.870 | 1.740 | 2.79E-04 |
| Arhgap8      | 1.303 | 1.728 | 2.160 | 0.520 | 0.953 | 0.840 | 1.738 | 1.09E-02 |
| Fgd5         | 1.001 | 1.206 | 1.510 | 0.338 | 0.758 | 0.368 | 1.736 | 8.79E-03 |
| LOC108348293 | 3.514 | 4.322 | 4.159 | 1.673 | 2.760 | 2.874 | 1.734 | 8.30E-03 |
| Cpeb1        | 2.264 | 2.520 | 3.298 | 1.006 | 1.602 | 1.697 | 1.733 | 2.13E-03 |
| Mbnl3        | 0.891 | 1.147 | 0.870 | 0.192 | 0.551 | 0.365 | 1.733 | 3.58E-02 |
| Slc18a3      | 0.258 | 0.445 | 0.567 | 0.058 | 0.102 | 0.246 | 1.729 | 1.77E-02 |
| Adamts14     | 2.782 | 3.679 | 3.913 | 1.625 | 2.318 | 2.115 | 1.729 | 9.19E-03 |
| Anks4b       | 2.178 | 1.981 | 2.134 | 0.757 | 1.180 | 1.051 | 1.727 | 4.64E-03 |
| Capn3        | 0.748 | 0.810 | 0.903 | 0.087 | 0.542 | 0.250 | 1.724 | 2.23E-02 |
| Dnah2        | 0.427 | 0.560 | 0.741 | 0.131 | 0.261 | 0.210 | 1.722 | 6.66E-03 |
| Scn3a        | 4.681 | 4.897 | 4.691 | 2.773 | 3.449 | 3.309 | 1.721 | 3.69E-04 |
| Lypd5        | 0.887 | 0.956 | 1.319 | 0.278 | 0.592 | 0.339 | 1.720 | 1.85E-02 |
| Mns1         | 4.527 | 4.590 | 5.019 | 2.882 | 3.529 | 2.936 | 1.718 | 4.97E-04 |
| B3galnt2     | 4.190 | 4.271 | 4.889 | 2.619 | 2.966 | 3.061 | 1.717 | 3.24E-04 |
| LOC100910725 | 2.199 | 2.252 | 3.108 | 0.687 | 1.343 | 1.712 | 1.713 | 2.88E-02 |
| Duox1        | 1.478 | 2.304 | 2.100 | 0.349 | 1.184 | 1.175 | 1.711 | 2.93E-02 |
| Zdhhc11      | 0.413 | 0.482 | 0.622 | 0.081 | 0.188 | 0.233 | 1.710 | 4.18E-02 |
| Tcaf2        | 1.705 | 1.772 | 1.670 | 0.460 | 0.894 | 0.939 | 1.705 | 3.47E-03 |
| Sstr1        | 1.804 | 2.334 | 2.558 | 0.996 | 1.285 | 1.022 | 1.702 | 9.10E-05 |
| Bfsp2        | 0.970 | 1.283 | 1.302 | 0.504 | 0.325 | 0.566 | 1.698 | 2.34E-03 |
| Gck          | 1.718 | 1.996 | 2.425 | 0.978 | 0.952 | 1.041 | 1.698 | 2.94E-03 |
| Ccdc159      | 3.582 | 3.832 | 4.099 | 2.002 | 2.579 | 2.592 | 1.696 | 1.05E-04 |
| Mesp1        | 1.026 | 1.015 | 1.193 | 0.209 | 0.750 | 0.273 | 1.693 | 4.34E-02 |
| Eps8l2       | 3.109 | 3.355 | 3.871 | 1.743 | 2.112 | 2.232 | 1.691 | 1.90E-05 |
| Htr5b        | 0.232 | 0.484 | 0.645 | 0.044 | 0.243 | 0.179 | 1.687 | 1.83E-02 |
| LOC501421    | 3.997 | 4.131 | 4.428 | 2.498 | 2.745 | 2.772 | 1.682 | 4.90E-03 |
| Cav3         | 2.552 | 2.841 | 2.890 | 1.111 | 1.819 | 1.489 | 1.675 | 9.80E-04 |

|                |       |       |       |       |       |       |       |          |
|----------------|-------|-------|-------|-------|-------|-------|-------|----------|
| Zfp575         | 1.925 | 2.245 | 3.336 | 1.222 | 1.404 | 1.460 | 1.673 | 1.19E-02 |
| Scimp          | 0.694 | 0.989 | 0.945 | 0.282 | 0.428 | 0.285 | 1.670 | 1.37E-02 |
| Cartpt         | 1.750 | 2.661 | 2.751 | 1.496 | 1.441 | 0.609 | 1.669 | 4.58E-02 |
| Lap3           | 6.268 | 6.341 | 6.952 | 4.650 | 4.976 | 5.095 | 1.667 | 1.83E-06 |
| Palm2          | 2.023 | 2.184 | 2.320 | 0.829 | 1.286 | 1.113 | 1.667 | 9.38E-04 |
| Gal            | 3.766 | 4.590 | 4.029 | 1.921 | 3.058 | 2.848 | 1.664 | 2.23E-03 |
| Eras           | 1.409 | 1.625 | 1.625 | 0.551 | 0.638 | 0.842 | 1.663 | 2.56E-03 |
| Trip10         | 5.636 | 5.547 | 6.046 | 3.825 | 4.249 | 4.354 | 1.662 | 2.04E-06 |
| Sftpc          | 0.714 | 1.421 | 1.224 | 0.564 | 0.296 | 0.471 | 1.662 | 3.05E-02 |
| Lgals9         | 8.627 | 8.528 | 8.978 | 6.839 | 6.802 | 7.409 | 1.662 | 5.85E-05 |
| Gimap8         | 0.971 | 1.373 | 1.780 | 0.375 | 0.737 | 0.701 | 1.654 | 2.03E-02 |
| Cdt1           | 3.627 | 4.179 | 4.769 | 2.025 | 2.803 | 3.214 | 1.653 | 8.97E-04 |
| Nr1h4          | 1.580 | 1.538 | 2.101 | 0.547 | 1.050 | 0.831 | 1.649 | 3.13E-03 |
| Intu           | 3.558 | 3.894 | 4.163 | 2.185 | 2.355 | 2.625 | 1.648 | 8.74E-03 |
| Dnajb1         | 7.525 | 7.602 | 8.004 | 6.029 | 5.895 | 6.284 | 1.646 | 8.66E-06 |
| Mgam           | 0.403 | 0.693 | 0.525 | 0.152 | 0.237 | 0.203 | 1.642 | 1.80E-02 |
| Calr3          | 2.677 | 2.822 | 2.730 | 1.278 | 1.659 | 1.563 | 1.641 | 7.17E-05 |
| Klf1           | 1.819 | 1.773 | 1.976 | 0.683 | 0.782 | 1.140 | 1.636 | 1.24E-03 |
| Rn60_17_0453.2 | 1.960 | 2.202 | 2.021 | 0.817 | 1.122 | 1.126 | 1.634 | 1.47E-03 |
| Serpinh1       | 6.311 | 6.814 | 7.407 | 3.791 | 5.654 | 5.886 | 1.632 | 3.84E-02 |
| Wnt5b          | 1.222 | 1.415 | 1.692 | 0.341 | 0.851 | 0.722 | 1.631 | 1.49E-02 |
| Stc2           | 5.025 | 5.310 | 4.584 | 2.941 | 3.733 | 3.657 | 1.631 | 1.59E-03 |
| Lingo3         | 4.237 | 4.124 | 4.726 | 2.361 | 2.834 | 3.342 | 1.627 | 2.59E-04 |
| Bpifb1         | 3.298 | 4.694 | 4.993 | 2.657 | 2.625 | 3.461 | 1.626 | 5.24E-03 |
| Rhoc           | 5.990 | 6.715 | 6.924 | 4.062 | 5.142 | 5.464 | 1.625 | 3.65E-03 |
| Kcnb1          | 2.902 | 3.396 | 3.838 | 1.581 | 2.259 | 2.234 | 1.621 | 7.59E-03 |
| Elmo3          | 1.690 | 1.992 | 2.531 | 0.790 | 1.074 | 1.256 | 1.621 | 2.32E-03 |
| C2cd2          | 4.445 | 4.392 | 4.592 | 3.028 | 3.165 | 2.658 | 1.615 | 4.90E-05 |
| Mrgprf         | 3.420 | 3.580 | 4.110 | 1.295 | 2.239 | 3.016 | 1.602 | 2.15E-02 |

|                |       |       |       |       |       |       |       |          |
|----------------|-------|-------|-------|-------|-------|-------|-------|----------|
| Pygm           | 3.466 | 3.737 | 3.585 | 2.077 | 2.737 | 1.608 | 1.600 | 1.14E-02 |
| Calhm2         | 3.768 | 4.106 | 4.157 | 2.330 | 2.516 | 2.857 | 1.599 | 1.09E-04 |
| LOC498265      | 2.939 | 3.071 | 3.359 | 1.726 | 1.934 | 1.877 | 1.598 | 2.49E-04 |
| Padi2          | 2.107 | 2.205 | 2.958 | 1.257 | 1.142 | 1.503 | 1.594 | 2.32E-03 |
| Sgsh           | 3.720 | 3.896 | 4.429 | 2.152 | 2.698 | 2.910 | 1.593 | 2.71E-03 |
| Gstk1          | 4.951 | 4.692 | 5.229 | 3.345 | 3.495 | 3.546 | 1.589 | 2.46E-05 |
| AABR07042611.1 | 7.065 | 7.356 | 7.678 | 5.657 | 5.775 | 6.008 | 1.583 | 8.58E-04 |
| Ltk            | 2.951 | 3.025 | 3.141 | 1.530 | 1.948 | 1.819 | 1.582 | 3.42E-05 |
| Myo7b          | 0.188 | 0.312 | 0.456 | 0.128 | 0.119 | 0.088 | 1.577 | 1.90E-02 |
| Sspo           | 0.152 | 0.175 | 0.260 | 0.046 | 0.072 | 0.087 | 1.567 | 3.10E-02 |
| Rph3al         | 2.017 | 2.157 | 2.527 | 0.975 | 1.073 | 1.431 | 1.567 | 8.64E-04 |
| Heatr5a        | 4.053 | 4.193 | 4.780 | 2.579 | 3.005 | 3.187 | 1.566 | 1.83E-03 |
| Ldb3           | 0.747 | 0.885 | 0.874 | 0.340 | 0.471 | 0.270 | 1.565 | 2.89E-03 |
| Mnd1           | 2.177 | 2.254 | 2.023 | 1.397 | 0.800 | 1.024 | 1.563 | 4.06E-02 |
| RT1-CE4        | 6.090 | 6.865 | 7.291 | 4.399 | 5.601 | 5.567 | 1.561 | 3.08E-03 |
| Prnt1          | 6.628 | 6.756 | 6.462 | 5.326 | 5.402 | 4.085 | 1.560 | 1.89E-02 |
| Cep135         | 2.880 | 3.106 | 3.541 | 1.625 | 2.021 | 2.108 | 1.560 | 8.97E-04 |
| Rasa4          | 5.269 | 5.624 | 5.047 | 3.924 | 4.043 | 3.437 | 1.559 | 1.15E-03 |
| Ccdc189        | 1.762 | 2.410 | 2.731 | 1.224 | 1.459 | 1.011 | 1.558 | 7.03E-03 |
| AABR07062033.1 | 3.694 | 3.348 | 4.231 | 2.241 | 2.705 | 2.406 | 1.554 | 2.00E-03 |
| Ddn            | 1.551 | 1.800 | 2.626 | 0.620 | 1.097 | 1.366 | 1.553 | 2.15E-02 |
| Zkscan2        | 3.658 | 3.662 | 3.886 | 2.312 | 2.622 | 2.182 | 1.552 | 8.11E-05 |
| Plscr1         | 2.889 | 2.982 | 3.496 | 1.498 | 1.993 | 1.905 | 1.549 | 9.03E-04 |
| Col5a1         | 3.951 | 4.836 | 4.504 | 2.194 | 3.273 | 3.416 | 1.545 | 2.18E-02 |
| Pgf            | 2.110 | 2.475 | 2.100 | 0.964 | 1.423 | 1.151 | 1.543 | 4.30E-03 |
| Plod2          | 4.378 | 4.430 | 4.883 | 2.763 | 3.226 | 3.476 | 1.534 | 1.65E-04 |
| LOC108348065   | 7.107 | 7.151 | 7.390 | 5.744 | 5.806 | 5.493 | 1.530 | 1.51E-05 |
| Slc4a11        | 2.027 | 2.388 | 2.907 | 1.081 | 1.440 | 1.543 | 1.528 | 2.17E-03 |
| Mid1           | 0.838 | 1.269 | 1.757 | 0.375 | 0.623 | 0.842 | 1.511 | 2.61E-02 |

|                |       |       |       |       |       |       |       |          |
|----------------|-------|-------|-------|-------|-------|-------|-------|----------|
| 1700007B14Rik  | 1.639 | 2.044 | 1.970 | 0.513 | 1.131 | 1.223 | 1.511 | 2.75E-02 |
| Mpdz           | 5.444 | 5.303 | 5.749 | 3.918 | 3.952 | 4.297 | 1.506 | 1.71E-04 |
| Pus7           | 3.625 | 4.021 | 4.620 | 2.310 | 2.750 | 3.180 | 1.505 | 4.45E-03 |
| Jak3           | 3.478 | 3.807 | 4.145 | 2.342 | 2.726 | 2.361 | 1.504 | 6.65E-05 |
| Hap1           | 5.329 | 5.954 | 6.365 | 3.824 | 4.852 | 4.644 | 1.503 | 7.45E-04 |
| Hn1l           | 4.724 | 5.110 | 5.861 | 3.255 | 3.878 | 4.332 | 1.503 | 1.59E-03 |
| Slc27a2        | 1.105 | 0.758 | 1.607 | 0.565 | 0.533 | 0.508 | 1.500 | 2.56E-02 |
| AABR07013288.4 | 2.689 | 3.219 | 3.352 | 2.006 | 2.096 | 1.438 | 1.498 | 9.81E-03 |
| Tspan6         | 7.358 | 7.409 | 7.756 | 5.803 | 6.141 | 6.187 | 1.496 | 1.84E-07 |
| Slc37a2        | 1.257 | 1.625 | 1.851 | 0.913 | 0.686 | 1.090 | 1.496 | 5.86E-04 |
| Sipa1          | 1.936 | 2.443 | 2.525 | 0.616 | 1.545 | 1.523 | 1.495 | 6.50E-03 |
| Setdb2         | 3.545 | 3.333 | 3.745 | 2.160 | 2.199 | 2.432 | 1.493 | 5.56E-05 |
| Gramd2         | 0.759 | 0.870 | 0.940 | 0.356 | 0.486 | 0.226 | 1.491 | 2.12E-02 |
| LOC100364500   | 3.971 | 4.744 | 5.336 | 2.547 | 3.592 | 3.767 | 1.489 | 3.16E-02 |
| Tbx18          | 0.276 | 0.484 | 0.521 | 0.117 | 0.220 | 0.164 | 1.488 | 4.70E-02 |
| Nfatc2         | 1.107 | 1.303 | 1.734 | 0.572 | 0.622 | 0.770 | 1.485 | 8.29E-03 |
| Lca5           | 3.563 | 3.843 | 4.190 | 2.371 | 2.634 | 2.693 | 1.480 | 1.76E-04 |
| Figl1          | 1.354 | 1.845 | 2.012 | 0.812 | 0.885 | 0.990 | 1.466 | 8.91E-04 |
| Crybg3         | 1.540 | 1.853 | 2.273 | 0.737 | 0.983 | 1.254 | 1.465 | 1.53E-02 |
| Ulk3           | 3.721 | 3.595 | 4.088 | 2.306 | 2.478 | 2.748 | 1.457 | 4.56E-05 |
| Gpr3           | 2.624 | 2.632 | 2.936 | 1.623 | 1.492 | 1.622 | 1.456 | 3.64E-04 |
| Lcp2           | 0.609 | 1.027 | 0.941 | 0.206 | 0.318 | 0.591 | 1.451 | 1.89E-02 |
| Zfp853         | 3.012 | 3.124 | 3.563 | 1.867 | 2.338 | 1.876 | 1.449 | 8.78E-04 |
| Dclk3          | 0.904 | 1.582 | 1.600 | 0.383 | 0.705 | 0.903 | 1.447 | 2.67E-02 |
| Msh5           | 0.764 | 1.157 | 1.446 | 0.426 | 0.623 | 0.491 | 1.445 | 6.07E-03 |
| Tmem130        | 8.622 | 8.540 | 8.448 | 7.386 | 7.088 | 6.635 | 1.444 | 5.56E-03 |
| Asl            | 5.784 | 5.897 | 6.073 | 4.086 | 4.781 | 4.617 | 1.442 | 5.08E-06 |
| Hhat           | 2.222 | 2.350 | 3.173 | 1.193 | 1.395 | 1.925 | 1.442 | 3.86E-03 |
| Slc12a5        | 5.417 | 5.210 | 5.811 | 4.106 | 4.330 | 3.765 | 1.438 | 5.39E-05 |



|              |       |       |       |       |       |       |       |          |
|--------------|-------|-------|-------|-------|-------|-------|-------|----------|
| Hspa1l       | 1.084 | 1.421 | 1.268 | 0.408 | 0.693 | 0.695 | 1.438 | 2.90E-02 |
| Lmo7         | 4.517 | 4.738 | 5.311 | 3.139 | 3.505 | 3.741 | 1.436 | 1.21E-03 |
| Ift27        | 6.064 | 5.723 | 6.012 | 4.640 | 4.557 | 4.400 | 1.433 | 1.93E-04 |
| Gstm1        | 6.226 | 6.756 | 7.142 | 4.775 | 5.531 | 5.580 | 1.432 | 4.48E-04 |
| Dcbld1       | 4.325 | 4.290 | 5.156 | 3.252 | 3.243 | 3.402 | 1.421 | 5.14E-04 |
| Echdc1       | 5.633 | 5.647 | 5.960 | 4.210 | 4.402 | 4.545 | 1.416 | 3.05E-06 |
| Hck          | 2.499 | 2.374 | 2.757 | 1.360 | 1.224 | 1.832 | 1.415 | 4.94E-03 |
| Scin         | 0.693 | 0.948 | 1.143 | 0.395 | 0.310 | 0.535 | 1.413 | 1.73E-02 |
| Mis18a       | 1.791 | 1.974 | 2.808 | 0.897 | 1.562 | 1.286 | 1.411 | 4.15E-02 |
| Mroh7        | 1.290 | 1.912 | 2.075 | 0.448 | 1.351 | 0.926 | 1.410 | 4.98E-02 |
| Gprasp2      | 8.081 | 7.944 | 8.157 | 6.666 | 6.716 | 6.576 | 1.409 | 5.46E-05 |
| Mtrf1l       | 5.391 | 5.496 | 5.920 | 4.103 | 4.346 | 4.361 | 1.408 | 4.05E-05 |
| Carns1       | 1.297 | 1.447 | 2.148 | 0.634 | 0.936 | 0.989 | 1.408 | 1.14E-02 |
| Dnaaf1       | 0.272 | 0.650 | 0.780 | 0.240 | 0.232 | 0.242 | 1.406 | 2.41E-02 |
| Plin2        | 6.240 | 6.460 | 6.768 | 4.353 | 5.422 | 5.451 | 1.406 | 1.55E-03 |
| Mtmr11       | 3.324 | 3.805 | 3.929 | 1.993 | 2.722 | 2.626 | 1.405 | 2.09E-03 |
| Syt5         | 7.447 | 7.536 | 7.924 | 6.391 | 6.037 | 6.226 | 1.404 | 2.00E-03 |
| Ethe1        | 5.948 | 5.954 | 6.514 | 4.690 | 4.897 | 4.754 | 1.399 | 1.14E-04 |
| Anxa4        | 4.615 | 4.950 | 4.760 | 3.004 | 3.822 | 3.586 | 1.396 | 1.74E-04 |
| Zcchc12      | 6.405 | 6.272 | 6.941 | 5.126 | 5.183 | 5.278 | 1.386 | 6.31E-05 |
| Klhl10       | 0.862 | 1.054 | 1.563 | 0.386 | 0.849 | 0.446 | 1.380 | 3.11E-02 |
| Lxn          | 5.288 | 5.792 | 5.633 | 4.048 | 4.591 | 4.078 | 1.378 | 3.64E-04 |
| LOC102551435 | 1.976 | 2.137 | 2.640 | 1.228 | 1.130 | 1.497 | 1.378 | 2.69E-03 |
| LOC619574    | 5.230 | 5.451 | 6.022 | 4.001 | 4.276 | 4.484 | 1.378 | 3.45E-05 |
| Nphs2        | 1.074 | 1.766 | 1.565 | 0.575 | 0.925 | 0.768 | 1.374 | 1.64E-02 |
| Mtus2        | 3.439 | 4.183 | 3.939 | 2.447 | 3.231 | 3.238 | 1.369 | 1.09E-04 |
| Lacc1        | 2.745 | 3.075 | 3.403 | 1.886 | 1.986 | 2.038 | 1.367 | 9.04E-03 |
| Prim2        | 5.041 | 5.008 | 5.130 | 3.910 | 3.704 | 3.650 | 1.362 | 3.24E-04 |
| Des          | 3.671 | 4.527 | 4.633 | 1.965 | 3.403 | 3.513 | 1.354 | 2.65E-02 |

|          |       |       |       |       |       |       |       |          |
|----------|-------|-------|-------|-------|-------|-------|-------|----------|
| Arhgef28 | 2.108 | 2.553 | 2.408 | 1.115 | 1.617 | 1.438 | 1.350 | 1.70E-03 |
| Ramp2    | 3.268 | 3.562 | 4.680 | 2.460 | 2.470 | 3.151 | 1.348 | 2.15E-02 |
| Il17re   | 2.441 | 2.816 | 2.696 | 1.429 | 1.809 | 1.609 | 1.347 | 2.15E-03 |
| Doc2a    | 4.892 | 4.934 | 6.035 | 3.560 | 3.862 | 4.633 | 1.347 | 4.15E-03 |
| Vstm2a   | 3.859 | 4.027 | 4.714 | 2.927 | 3.205 | 2.858 | 1.340 | 2.33E-03 |
| Lman2l   | 7.335 | 7.240 | 7.402 | 6.094 | 6.073 | 5.725 | 1.338 | 1.05E-04 |
| Sdk2     | 2.019 | 2.455 | 2.703 | 1.170 | 1.627 | 1.554 | 1.337 | 3.25E-02 |
| Zfp503   | 2.555 | 2.629 | 3.029 | 1.552 | 1.717 | 1.827 | 1.334 | 4.85E-06 |
| Myrip    | 2.110 | 2.523 | 3.089 | 1.144 | 1.705 | 1.888 | 1.332 | 1.16E-02 |
| Ttc39a   | 2.054 | 2.119 | 2.518 | 1.004 | 1.263 | 1.628 | 1.329 | 8.64E-04 |
| Cenpn    | 4.195 | 4.358 | 5.043 | 3.130 | 3.116 | 3.684 | 1.327 | 3.56E-04 |
| Vwa3b    | 1.585 | 2.103 | 1.910 | 0.598 | 1.185 | 1.081 | 1.327 | 2.37E-02 |
| Dtnb     | 5.243 | 5.441 | 5.920 | 4.246 | 4.226 | 4.335 | 1.326 | 6.84E-05 |
| Kank2    | 2.400 | 2.761 | 2.980 | 0.899 | 1.862 | 2.091 | 1.324 | 2.85E-02 |
| Rec114   | 1.636 | 1.125 | 1.721 | 0.728 | 0.616 | 1.004 | 1.324 | 2.51E-02 |
| Timp3    | 3.842 | 3.965 | 4.429 | 2.727 | 2.770 | 3.141 | 1.323 | 8.00E-05 |
| Nfkbid   | 2.323 | 2.493 | 2.938 | 1.461 | 1.665 | 1.638 | 1.313 | 9.59E-04 |
| Olr287   | 1.770 | 1.602 | 1.648 | 0.763 | 1.293 | 0.611 | 1.311 | 1.43E-02 |
| Xkr8     | 2.461 | 2.788 | 3.192 | 1.445 | 1.890 | 2.004 | 1.306 | 6.87E-04 |
| Bbx      | 5.159 | 5.063 | 5.840 | 3.980 | 4.087 | 4.352 | 1.302 | 3.43E-02 |
| Col2a1   | 1.157 | 1.293 | 1.475 | 0.594 | 0.706 | 0.716 | 1.296 | 1.94E-04 |
| Stk3     | 3.762 | 4.073 | 4.605 | 2.761 | 3.253 | 2.963 | 1.294 | 3.04E-04 |
| P4ha1    | 5.033 | 5.194 | 5.622 | 3.640 | 4.142 | 4.352 | 1.293 | 8.97E-04 |
| Golm1    | 4.352 | 4.754 | 5.121 | 3.432 | 3.447 | 3.757 | 1.293 | 2.78E-03 |
| Btg3     | 5.110 | 5.529 | 5.970 | 4.009 | 4.397 | 4.544 | 1.293 | 6.32E-04 |
| Cib2     | 5.039 | 4.931 | 5.071 | 4.040 | 3.857 | 3.267 | 1.292 | 5.97E-03 |
| Vegfb    | 5.149 | 5.230 | 5.487 | 3.796 | 4.128 | 4.210 | 1.292 | 5.19E-06 |
| Rgn      | 3.485 | 3.591 | 3.516 | 1.986 | 2.925 | 2.239 | 1.284 | 9.16E-03 |
| RT1-CE5  | 6.374 | 7.268 | 7.662 | 4.637 | 6.282 | 6.362 | 1.283 | 4.64E-02 |

|           |       |       |       |       |       |       |       |          |
|-----------|-------|-------|-------|-------|-------|-------|-------|----------|
| Cage1     | 1.500 | 1.204 | 1.757 | 0.689 | 1.036 | 0.702 | 1.282 | 1.22E-02 |
| Plekha7   | 3.374 | 3.512 | 3.921 | 2.320 | 2.542 | 2.589 | 1.274 | 2.64E-03 |
| Hsd17b1   | 1.701 | 2.269 | 2.674 | 1.128 | 1.349 | 1.561 | 1.268 | 6.95E-03 |
| Pacsin2   | 6.948 | 6.920 | 7.391 | 5.681 | 5.698 | 6.085 | 1.264 | 3.27E-04 |
| Lrrc17    | 3.771 | 4.425 | 4.107 | 2.301 | 2.967 | 3.491 | 1.263 | 2.41E-03 |
| Dct       | 2.276 | 2.257 | 2.966 | 1.479 | 1.419 | 1.784 | 1.262 | 8.90E-03 |
| Akap2     | 3.628 | 3.936 | 4.370 | 2.560 | 3.094 | 3.126 | 1.261 | 2.78E-02 |
| Sertad3   | 2.975 | 3.158 | 3.766 | 1.835 | 2.435 | 2.447 | 1.257 | 2.50E-03 |
| Tacr3     | 1.663 | 1.630 | 2.073 | 1.339 | 0.948 | 0.628 | 1.256 | 5.00E-02 |
| Plekhs1   | 1.134 | 1.576 | 1.735 | 0.583 | 0.813 | 1.034 | 1.256 | 1.89E-02 |
| Il1r2     | 2.075 | 2.187 | 2.035 | 0.882 | 1.338 | 1.497 | 1.255 | 1.70E-02 |
| Anxa11    | 5.183 | 5.489 | 5.975 | 3.622 | 4.656 | 4.648 | 1.252 | 1.07E-03 |
| Psmb9     | 5.335 | 5.363 | 6.083 | 3.732 | 4.667 | 4.691 | 1.252 | 2.15E-03 |
| Fam210b   | 3.920 | 3.513 | 4.341 | 2.646 | 2.796 | 3.027 | 1.251 | 8.98E-04 |
| Npepl1    | 4.928 | 5.159 | 5.434 | 3.580 | 4.075 | 4.243 | 1.250 | 2.70E-05 |
| Apba3     | 3.486 | 3.910 | 4.356 | 2.418 | 2.920 | 3.069 | 1.244 | 4.60E-04 |
| Nwd2      | 0.943 | 1.330 | 1.260 | 0.481 | 0.854 | 0.526 | 1.236 | 3.11E-02 |
| Serpinb6  | 4.175 | 4.698 | 4.997 | 2.944 | 3.787 | 3.680 | 1.231 | 7.59E-03 |
| Fsbp      | 2.045 | 1.698 | 2.387 | 0.853 | 1.493 | 1.332 | 1.230 | 4.54E-02 |
| Uba7      | 3.596 | 3.644 | 3.961 | 2.703 | 2.566 | 2.603 | 1.229 | 4.53E-05 |
| Lama3     | 4.826 | 5.621 | 5.126 | 3.402 | 4.376 | 4.343 | 1.221 | 5.55E-03 |
| Lims2     | 0.980 | 1.020 | 1.274 | 0.490 | 0.333 | 0.733 | 1.214 | 1.36E-02 |
| Hirip3    | 6.141 | 5.961 | 6.718 | 4.870 | 5.038 | 5.423 | 1.212 | 3.32E-04 |
| LOC654482 | 2.625 | 3.224 | 3.262 | 1.642 | 2.238 | 2.264 | 1.211 | 2.48E-02 |
| Psrc1     | 2.216 | 2.783 | 3.269 | 1.381 | 2.005 | 2.075 | 1.209 | 4.37E-03 |
| Bmp2      | 1.078 | 1.826 | 1.374 | 0.593 | 0.934 | 0.907 | 1.208 | 1.33E-02 |
| Rbpjl     | 0.538 | 1.126 | 0.860 | 0.383 | 0.447 | 0.460 | 1.207 | 2.17E-02 |
| Mthfr     | 3.694 | 4.077 | 4.200 | 2.428 | 3.116 | 3.106 | 1.206 | 2.32E-03 |
| Tmem35    | 7.471 | 7.267 | 7.526 | 6.327 | 6.390 | 5.854 | 1.205 | 9.33E-03 |

|                |        |        |        |        |        |        |       |          |
|----------------|--------|--------|--------|--------|--------|--------|-------|----------|
| Gusb           | 3.859  | 3.967  | 4.406  | 2.699  | 3.052  | 3.188  | 1.205 | 4.08E-04 |
| Epha8          | 3.407  | 3.709  | 4.368  | 2.210  | 3.026  | 3.018  | 1.204 | 3.33E-03 |
| Rcan3          | 6.043  | 6.351  | 6.802  | 5.014  | 5.361  | 5.326  | 1.202 | 3.73E-04 |
| Pgm3           | 4.324  | 4.484  | 5.114  | 3.115  | 3.479  | 3.962  | 1.202 | 1.74E-03 |
| Ahsa2          | 6.889  | 6.748  | 6.947  | 5.617  | 5.659  | 5.796  | 1.201 | 4.42E-06 |
| Erp29          | 7.533  | 7.580  | 8.096  | 6.357  | 6.497  | 6.855  | 1.199 | 3.23E-05 |
| Rnf213         | 4.178  | 4.195  | 4.708  | 2.756  | 3.397  | 3.571  | 1.199 | 1.18E-02 |
| Prkab2         | 4.035  | 4.063  | 4.636  | 2.960  | 3.170  | 3.423  | 1.199 | 3.60E-04 |
| Tmem44         | 3.267  | 3.524  | 4.077  | 2.429  | 2.697  | 2.643  | 1.196 | 8.37E-04 |
| Pgm2           | 5.274  | 5.383  | 5.885  | 4.277  | 4.434  | 4.445  | 1.191 | 1.74E-05 |
| Fam131c        | 4.630  | 4.116  | 5.154  | 3.669  | 3.387  | 3.544  | 1.190 | 1.34E-02 |
| Slc26a8        | 2.712  | 2.947  | 3.422  | 1.709  | 2.249  | 2.248  | 1.188 | 1.59E-03 |
| Aard           | 3.861  | 4.316  | 4.436  | 2.743  | 3.464  | 3.149  | 1.183 | 1.20E-03 |
| Tifa           | 3.657  | 4.051  | 4.485  | 2.579  | 3.279  | 3.272  | 1.182 | 5.11E-03 |
| Unc5d          | 3.759  | 3.852  | 4.135  | 2.868  | 2.935  | 2.715  | 1.181 | 3.24E-03 |
| Hsp90ab1       | 11.636 | 11.605 | 11.790 | 10.547 | 10.254 | 10.623 | 1.178 | 3.82E-04 |
| Cadm1          | 5.812  | 5.861  | 6.515  | 4.540  | 5.053  | 5.171  | 1.167 | 1.15E-03 |
| Aldh1l2        | 4.064  | 4.772  | 5.050  | 2.717  | 4.114  | 3.659  | 1.166 | 2.18E-02 |
| Bahd1          | 5.036  | 5.186  | 5.541  | 4.035  | 4.204  | 4.155  | 1.166 | 8.66E-06 |
| Tmem98         | 2.891  | 3.424  | 3.721  | 1.980  | 2.529  | 2.571  | 1.161 | 2.72E-02 |
| Gfra1          | 1.327  | 1.735  | 2.105  | 0.745  | 1.064  | 1.275  | 1.160 | 2.63E-02 |
| Klhl40         | 2.558  | 2.568  | 3.248  | 1.513  | 1.649  | 2.374  | 1.159 | 3.60E-02 |
| Kcnd1          | 3.633  | 3.846  | 3.915  | 2.712  | 3.059  | 2.407  | 1.157 | 4.25E-03 |
| Zfp772         | 2.140  | 2.244  | 2.462  | 1.344  | 1.741  | 1.215  | 1.156 | 3.21E-02 |
| Dnaaf2         | 3.873  | 4.065  | 4.554  | 2.770  | 3.196  | 3.368  | 1.156 | 9.30E-05 |
| Kcne2          | 2.633  | 2.741  | 2.943  | 1.302  | 1.908  | 2.279  | 1.153 | 1.64E-02 |
| AABR07065031.1 | 0.789  | 1.067  | 1.094  | 0.302  | 0.510  | 0.755  | 1.153 | 2.75E-02 |
| Gprasp1        | 8.357  | 8.242  | 8.360  | 7.202  | 7.188  | 7.122  | 1.146 | 6.33E-05 |
| RGD1304624     | 4.068  | 4.487  | 4.814  | 3.204  | 3.349  | 3.662  | 1.140 | 3.28E-04 |

|                |       |       |       |       |       |       |       |          |
|----------------|-------|-------|-------|-------|-------|-------|-------|----------|
| Grid2ip        | 2.556 | 2.920 | 3.100 | 1.340 | 2.369 | 2.009 | 1.134 | 3.31E-02 |
| Relt           | 2.073 | 2.180 | 2.785 | 1.500 | 1.500 | 1.778 | 1.132 | 7.77E-04 |
| Ndufaf2        | 4.066 | 3.541 | 4.401 | 2.829 | 3.190 | 3.036 | 1.131 | 5.58E-03 |
| Crb3           | 1.082 | 1.426 | 1.234 | 0.741 | 0.865 | 0.573 | 1.128 | 8.14E-03 |
| Cyb561         | 4.615 | 4.451 | 4.816 | 3.487 | 3.560 | 3.512 | 1.124 | 5.14E-04 |
| Epha6          | 3.742 | 3.152 | 3.381 | 2.620 | 2.201 | 2.560 | 1.124 | 7.38E-03 |
| Plek2          | 0.811 | 0.848 | 0.910 | 0.369 | 0.437 | 0.560 | 1.123 | 9.63E-03 |
| Pnma3          | 3.999 | 4.206 | 4.526 | 3.079 | 3.345 | 3.169 | 1.123 | 1.09E-04 |
| Agpat5         | 5.432 | 5.375 | 5.869 | 4.234 | 4.478 | 4.747 | 1.122 | 2.85E-05 |
| Pnpla7         | 4.230 | 4.749 | 4.422 | 3.015 | 3.757 | 3.466 | 1.120 | 8.27E-03 |
| Cacna2d2       | 6.102 | 5.885 | 6.510 | 5.092 | 5.205 | 4.866 | 1.117 | 2.56E-04 |
| Tmem14a        | 6.032 | 6.002 | 6.207 | 4.756 | 5.191 | 5.008 | 1.117 | 4.73E-04 |
| Matk           | 3.890 | 4.011 | 4.006 | 2.921 | 3.070 | 2.838 | 1.115 | 2.85E-03 |
| Slc44a3        | 2.063 | 1.968 | 1.768 | 1.176 | 1.387 | 1.044 | 1.115 | 9.77E-03 |
| Krt80          | 0.499 | 0.844 | 1.128 | 0.327 | 0.471 | 0.526 | 1.114 | 3.39E-02 |
| Snx3           | 8.927 | 9.049 | 9.195 | 7.955 | 7.902 | 8.007 | 1.113 | 1.71E-04 |
| Tlcd1          | 1.027 | 1.188 | 1.583 | 0.624 | 0.857 | 0.700 | 1.112 | 7.32E-03 |
| Msl3l2         | 3.851 | 4.158 | 4.594 | 2.891 | 3.130 | 3.517 | 1.112 | 6.97E-04 |
| AABR07034750.1 | 0.991 | 0.924 | 1.083 | 0.565 | 0.461 | 0.607 | 1.111 | 2.11E-02 |
| Sec23b         | 4.442 | 4.777 | 5.083 | 3.277 | 3.882 | 3.996 | 1.109 | 1.14E-03 |
| Ulk4           | 1.575 | 1.551 | 1.629 | 0.630 | 1.097 | 1.099 | 1.109 | 3.40E-03 |
| Cacng8         | 3.572 | 3.505 | 3.970 | 2.702 | 2.628 | 2.747 | 1.106 | 1.35E-03 |
| Pygl           | 1.593 | 2.115 | 2.051 | 0.864 | 1.118 | 1.582 | 1.106 | 3.45E-02 |
| Hspa4          | 8.340 | 8.122 | 8.573 | 7.177 | 7.176 | 7.418 | 1.105 | 1.90E-05 |
| Mx2            | 5.487 | 5.617 | 6.437 | 4.085 | 4.827 | 5.361 | 1.104 | 1.89E-02 |
| Cdk18          | 1.511 | 1.883 | 2.251 | 1.093 | 0.986 | 1.420 | 1.102 | 9.37E-03 |
| Ccdc184        | 3.774 | 3.856 | 4.742 | 3.221 | 2.973 | 3.206 | 1.101 | 1.14E-02 |
| Wdr66          | 5.718 | 5.609 | 5.857 | 4.625 | 4.791 | 4.547 | 1.100 | 1.74E-03 |
| Dhcr7          | 5.053 | 4.983 | 4.968 | 3.973 | 3.814 | 4.051 | 1.100 | 7.39E-03 |

|              |       |       |        |       |       |       |       |          |
|--------------|-------|-------|--------|-------|-------|-------|-------|----------|
| Pnck         | 5.298 | 5.463 | 5.424  | 4.207 | 4.546 | 4.196 | 1.099 | 4.41E-04 |
| Tecta        | 0.540 | 0.436 | 0.624  | 0.176 | 0.290 | 0.358 | 1.098 | 3.37E-02 |
| Borcs6       | 4.266 | 4.522 | 4.935  | 3.508 | 3.416 | 3.699 | 1.097 | 2.26E-04 |
| Fam151b      | 3.011 | 2.842 | 3.409  | 2.248 | 2.009 | 2.273 | 1.093 | 8.62E-03 |
| Il17rc       | 1.782 | 2.113 | 2.208  | 0.927 | 1.411 | 1.505 | 1.092 | 2.94E-02 |
| Chrm4        | 1.561 | 1.889 | 2.731  | 1.237 | 1.219 | 1.589 | 1.091 | 2.14E-02 |
| Tigar        | 5.121 | 5.089 | 5.711  | 4.101 | 4.236 | 4.483 | 1.089 | 1.59E-04 |
| Rbm20        | 0.887 | 1.038 | 0.797  | 0.384 | 0.675 | 0.441 | 1.089 | 1.55E-02 |
| Parp12       | 3.606 | 4.100 | 4.685  | 2.463 | 3.256 | 3.655 | 1.089 | 1.83E-02 |
| Trim65       | 4.378 | 4.474 | 4.898  | 3.191 | 3.864 | 3.602 | 1.087 | 2.95E-04 |
| Klf8         | 2.788 | 2.798 | 3.425  | 1.733 | 2.311 | 2.327 | 1.085 | 1.44E-02 |
| LOC680254    | 2.553 | 2.963 | 3.517  | 1.917 | 2.208 | 2.284 | 1.083 | 2.22E-02 |
| Hpcal4       | 3.786 | 3.743 | 4.540  | 2.783 | 3.132 | 3.261 | 1.083 | 1.43E-03 |
| Ifih1        | 2.702 | 3.142 | 3.714  | 1.594 | 2.459 | 2.745 | 1.083 | 3.99E-02 |
| Aff1         | 2.993 | 3.358 | 3.932  | 2.365 | 2.658 | 2.549 | 1.081 | 3.96E-02 |
| Chrnbl       | 2.667 | 2.867 | 2.867  | 1.656 | 2.048 | 2.091 | 1.081 | 4.26E-04 |
| Ampd3        | 2.547 | 3.154 | 3.783  | 1.659 | 2.780 | 2.338 | 1.076 | 3.92E-02 |
| Samd15       | 1.905 | 2.304 | 2.609  | 1.184 | 1.528 | 1.818 | 1.074 | 3.83E-02 |
| Plcd3        | 2.531 | 2.671 | 3.402  | 1.595 | 2.132 | 2.298 | 1.074 | 8.14E-03 |
| Mthfd2       | 4.018 | 4.291 | 4.933  | 2.844 | 3.329 | 4.026 | 1.070 | 5.29E-03 |
| Tspan33      | 3.758 | 4.007 | 4.081  | 2.590 | 3.262 | 3.040 | 1.067 | 1.50E-04 |
| Pcp4         | 5.605 | 6.400 | 5.587  | 4.533 | 5.072 | 5.001 | 1.065 | 1.08E-02 |
| Dynll1       | 9.908 | 9.788 | 10.053 | 8.914 | 8.709 | 8.930 | 1.063 | 6.71E-03 |
| Gng7         | 1.220 | 1.209 | 1.558  | 0.571 | 0.825 | 0.952 | 1.062 | 3.16E-02 |
| Rai2         | 2.823 | 3.175 | 3.677  | 1.991 | 2.468 | 2.547 | 1.060 | 2.95E-03 |
| Ptpn13       | 3.444 | 3.695 | 4.293  | 2.653 | 2.927 | 3.093 | 1.058 | 8.24E-03 |
| Derl3        | 3.161 | 3.179 | 3.287  | 2.008 | 2.330 | 2.551 | 1.058 | 8.45E-03 |
| LOC103694875 | 3.161 | 3.179 | 3.287  | 2.008 | 2.330 | 2.551 | 1.058 | 8.45E-03 |
| Ckmt2        | 4.213 | 4.164 | 4.300  | 3.133 | 3.136 | 3.466 | 1.057 | 4.96E-02 |

|                |       |       |       |       |       |       |       |          |
|----------------|-------|-------|-------|-------|-------|-------|-------|----------|
| Fam167a        | 3.521 | 4.056 | 4.485 | 2.759 | 3.359 | 3.136 | 1.052 | 1.83E-03 |
| Hspa2          | 4.611 | 4.864 | 5.409 | 3.482 | 4.140 | 4.275 | 1.049 | 5.30E-03 |
| Rn60_12_0305.2 | 2.014 | 2.616 | 2.798 | 1.737 | 1.689 | 1.637 | 1.047 | 1.64E-02 |
| Hadh           | 3.228 | 3.672 | 4.122 | 2.254 | 3.052 | 2.945 | 1.045 | 2.64E-02 |
| Edrf1          | 5.264 | 5.432 | 5.722 | 4.303 | 4.559 | 4.564 | 1.041 | 1.10E-05 |
| Arl15          | 4.856 | 4.850 | 5.566 | 3.873 | 4.056 | 4.431 | 1.038 | 1.43E-02 |
| Phyhd1         | 4.831 | 4.773 | 4.972 | 3.626 | 4.004 | 3.971 | 1.037 | 2.15E-04 |
| Gtf2f2         | 4.859 | 5.006 | 5.485 | 4.091 | 4.027 | 4.307 | 1.036 | 3.24E-04 |
| Coro6          | 4.626 | 4.798 | 5.218 | 3.642 | 3.955 | 4.164 | 1.036 | 1.59E-03 |
| Camkk1         | 3.907 | 3.960 | 4.608 | 2.946 | 3.305 | 3.396 | 1.036 | 3.69E-04 |
| Nfatc2ip       | 3.157 | 3.199 | 3.953 | 2.327 | 2.484 | 2.843 | 1.032 | 4.37E-03 |
| Pomt1          | 4.486 | 4.481 | 4.840 | 3.520 | 3.673 | 3.698 | 1.028 | 9.47E-05 |
| Ocln           | 2.713 | 2.552 | 2.935 | 2.034 | 1.891 | 1.819 | 1.021 | 7.37E-03 |
| Plekhh1        | 2.181 | 2.123 | 2.937 | 1.741 | 1.628 | 1.620 | 1.019 | 4.29E-03 |
| Slc35a3        | 5.528 | 5.377 | 5.981 | 4.419 | 4.745 | 4.835 | 1.018 | 4.07E-03 |
| Opa3           | 5.272 | 5.441 | 5.715 | 4.496 | 4.398 | 4.552 | 1.016 | 6.65E-05 |
| Atad2          | 3.938 | 3.910 | 4.413 | 2.869 | 3.346 | 3.308 | 1.015 | 6.36E-03 |
| Aldh1b1        | 1.258 | 1.239 | 1.349 | 0.561 | 0.958 | 0.793 | 1.013 | 3.60E-02 |
| Prpf40b        | 5.199 | 5.383 | 5.571 | 4.264 | 4.480 | 4.476 | 1.008 | 2.37E-04 |
| Ghr            | 3.178 | 4.040 | 3.957 | 2.603 | 2.865 | 3.159 | 1.008 | 2.48E-02 |
| Gpx8           | 5.598 | 5.805 | 6.540 | 4.192 | 5.302 | 5.460 | 1.006 | 4.68E-02 |
| Acer2          | 1.479 | 1.457 | 2.306 | 1.041 | 1.049 | 1.345 | 1.004 | 1.84E-02 |
| Dnaja4         | 5.712 | 5.445 | 5.859 | 4.668 | 4.604 | 4.829 | 1.002 | 1.71E-04 |
| Mok            | 3.053 | 3.252 | 3.541 | 2.110 | 2.089 | 2.490 | 0.998 | 2.48E-02 |
| Sap30          | 5.870 | 6.059 | 6.733 | 5.208 | 5.289 | 5.347 | 0.998 | 1.85E-02 |
| Hyal2          | 4.719 | 4.844 | 4.664 | 3.827 | 3.828 | 3.709 | 0.994 | 1.53E-03 |
| Abhd2          | 5.736 | 5.767 | 6.423 | 4.696 | 5.046 | 5.296 | 0.993 | 6.51E-03 |
| Slc35c1        | 5.087 | 5.331 | 5.762 | 4.238 | 4.383 | 4.665 | 0.988 | 3.64E-04 |
| Acss2          | 6.574 | 6.717 | 6.587 | 5.649 | 5.764 | 5.513 | 0.987 | 1.16E-03 |

|                |       |       |       |       |       |       |       |          |
|----------------|-------|-------|-------|-------|-------|-------|-------|----------|
| Nmrk1          | 3.333 | 3.043 | 3.225 | 2.448 | 2.452 | 2.195 | 0.987 | 9.61E-03 |
| Muc13          | 1.778 | 2.116 | 2.209 | 1.236 | 1.420 | 1.447 | 0.983 | 1.18E-02 |
| Tapbp1         | 4.698 | 5.026 | 5.378 | 3.617 | 4.354 | 4.289 | 0.980 | 2.34E-03 |
| Bcap31         | 7.744 | 7.792 | 7.873 | 6.743 | 6.842 | 6.930 | 0.977 | 8.01E-05 |
| Zfp365         | 4.287 | 4.308 | 4.539 | 3.539 | 3.556 | 3.275 | 0.973 | 8.97E-04 |
| Znf354b        | 2.311 | 2.244 | 2.791 | 1.786 | 1.557 | 1.837 | 0.973 | 1.26E-02 |
| Ccdc14         | 2.242 | 2.271 | 2.531 | 1.447 | 1.853 | 1.624 | 0.952 | 5.74E-04 |
| Dock10         | 3.592 | 3.597 | 4.046 | 2.574 | 3.052 | 3.201 | 0.951 | 8.86E-03 |
| Adra2c         | 4.760 | 4.848 | 5.140 | 3.451 | 3.955 | 4.498 | 0.945 | 6.46E-03 |
| Baiap2l2       | 1.370 | 1.673 | 1.829 | 1.174 | 1.039 | 0.914 | 0.942 | 4.15E-02 |
| Ogfod1         | 3.808 | 4.058 | 4.711 | 3.100 | 3.400 | 3.558 | 0.941 | 5.34E-03 |
| Akip1          | 3.813 | 4.124 | 4.452 | 3.010 | 3.494 | 3.294 | 0.941 | 1.00E-03 |
| Polk           | 2.516 | 2.297 | 2.901 | 1.781 | 1.858 | 1.793 | 0.941 | 3.93E-03 |
| AABR07043564.1 | 2.999 | 3.385 | 3.741 | 2.316 | 2.475 | 2.906 | 0.937 | 1.28E-02 |
| B3glct         | 3.197 | 3.545 | 4.170 | 2.387 | 2.868 | 3.194 | 0.937 | 4.17E-02 |
| Gnpda1         | 4.508 | 4.858 | 5.276 | 3.745 | 4.192 | 4.070 | 0.935 | 3.24E-03 |
| Nsun5          | 5.312 | 5.249 | 5.497 | 4.396 | 4.402 | 4.536 | 0.932 | 1.59E-04 |
| Mycbpap        | 2.012 | 2.433 | 2.312 | 1.470 | 1.814 | 1.358 | 0.932 | 5.93E-03 |
| Trim7          | 1.719 | 1.928 | 1.899 | 0.906 | 1.394 | 1.392 | 0.931 | 4.75E-02 |
| Twf2           | 4.619 | 4.709 | 5.239 | 3.640 | 3.803 | 4.417 | 0.927 | 7.37E-03 |
| Slc39a11       | 3.153 | 3.272 | 3.714 | 2.227 | 2.475 | 2.975 | 0.923 | 3.86E-03 |
| Pusl1          | 4.525 | 4.946 | 5.104 | 3.706 | 4.098 | 4.138 | 0.922 | 2.97E-04 |
| Cct8           | 8.786 | 8.570 | 8.870 | 7.821 | 7.726 | 7.953 | 0.922 | 1.09E-03 |
| Rom1           | 2.876 | 3.482 | 3.575 | 1.886 | 2.819 | 2.774 | 0.914 | 2.52E-02 |
| Fkbp4          | 7.687 | 7.597 | 7.782 | 6.805 | 6.610 | 6.873 | 0.913 | 1.56E-03 |
| Nnat           | 9.047 | 8.967 | 9.136 | 8.300 | 8.082 | 7.882 | 0.913 | 4.98E-02 |
| Parp9          | 4.529 | 4.743 | 5.085 | 3.500 | 4.150 | 4.119 | 0.911 | 2.00E-03 |
| Tmem159        | 3.556 | 3.199 | 3.593 | 2.848 | 2.713 | 2.287 | 0.910 | 3.80E-02 |
| Ubxn2a         | 5.110 | 5.380 | 5.835 | 4.313 | 4.715 | 4.742 | 0.907 | 7.48E-03 |



|                |       |       |       |       |       |       |       |          |
|----------------|-------|-------|-------|-------|-------|-------|-------|----------|
| Kcnf1          | 4.562 | 4.334 | 4.622 | 3.520 | 3.662 | 3.773 | 0.906 | 5.39E-05 |
| Zfp593         | 3.904 | 3.954 | 4.383 | 3.185 | 3.229 | 3.326 | 0.902 | 1.14E-03 |
| Stk36          | 2.735 | 3.036 | 3.453 | 2.008 | 2.555 | 2.397 | 0.899 | 1.62E-02 |
| Sesn2          | 4.866 | 5.303 | 5.583 | 4.036 | 4.514 | 4.615 | 0.895 | 2.42E-04 |
| Kcnh8          | 1.759 | 1.856 | 2.357 | 1.050 | 1.286 | 1.795 | 0.889 | 2.36E-02 |
| Polr2h         | 5.406 | 5.448 | 5.972 | 4.708 | 4.692 | 4.843 | 0.888 | 2.81E-03 |
| St14           | 3.132 | 3.272 | 3.709 | 2.473 | 2.661 | 2.667 | 0.885 | 4.11E-03 |
| Ces5a          | 1.406 | 1.935 | 2.020 | 1.202 | 1.256 | 1.218 | 0.878 | 1.87E-02 |
| LOC100911516   | 9.592 | 9.488 | 9.246 | 8.472 | 8.749 | 8.490 | 0.877 | 7.40E-03 |
| Osbpl3         | 3.673 | 3.696 | 3.875 | 3.038 | 2.905 | 2.921 | 0.872 | 1.61E-02 |
| Fgd1           | 5.146 | 5.189 | 5.792 | 4.512 | 4.507 | 4.613 | 0.872 | 5.50E-04 |
| Dock9          | 4.779 | 4.878 | 5.305 | 4.015 | 4.317 | 4.123 | 0.870 | 6.23E-04 |
| Prkcdbp        | 5.864 | 5.909 | 6.399 | 4.970 | 4.977 | 5.623 | 0.870 | 6.22E-03 |
| Mrfap1         | 9.824 | 9.742 | 9.936 | 8.802 | 9.010 | 9.012 | 0.868 | 2.97E-04 |
| Rab39a         | 5.105 | 5.094 | 5.390 | 4.225 | 4.418 | 4.470 | 0.868 | 8.00E-05 |
| Hmgn1          | 7.443 | 7.413 | 7.923 | 6.342 | 6.561 | 7.237 | 0.867 | 6.20E-03 |
| Gaa            | 6.280 | 6.705 | 6.814 | 5.313 | 6.009 | 5.859 | 0.866 | 1.15E-03 |
| Actr5          | 3.239 | 3.384 | 3.791 | 2.468 | 2.787 | 2.889 | 0.865 | 3.97E-03 |
| Cenpk          | 2.505 | 2.721 | 3.244 | 1.987 | 1.969 | 2.455 | 0.864 | 3.47E-02 |
| Zbed5          | 5.108 | 4.949 | 4.930 | 4.208 | 4.076 | 4.253 | 0.858 | 1.23E-03 |
| Adcy3          | 4.199 | 4.221 | 4.912 | 3.384 | 3.696 | 3.883 | 0.857 | 2.41E-03 |
| Klhl25         | 3.504 | 3.576 | 4.048 | 2.737 | 3.057 | 3.017 | 0.857 | 1.86E-02 |
| Ltbp3          | 5.020 | 5.028 | 5.482 | 4.097 | 4.321 | 4.619 | 0.855 | 4.51E-04 |
| Ccdc134        | 3.227 | 3.580 | 3.895 | 2.404 | 3.070 | 2.945 | 0.855 | 5.22E-03 |
| Cenpl          | 3.587 | 3.781 | 4.052 | 3.058 | 2.979 | 2.998 | 0.853 | 7.23E-03 |
| Ppidl1         | 4.573 | 4.423 | 4.896 | 3.759 | 3.656 | 4.077 | 0.852 | 2.30E-02 |
| Cbfb           | 5.697 | 5.854 | 6.481 | 4.727 | 5.426 | 5.479 | 0.851 | 1.38E-02 |
| AABR07043445.1 | 4.195 | 4.564 | 4.684 | 3.571 | 3.719 | 3.758 | 0.850 | 2.48E-02 |
| Galnt13        | 5.718 | 5.353 | 5.241 | 4.854 | 4.606 | 4.406 | 0.849 | 4.05E-02 |

|                |       |       |       |       |       |       |       |          |
|----------------|-------|-------|-------|-------|-------|-------|-------|----------|
| Heg1           | 4.330 | 4.553 | 5.107 | 3.537 | 3.995 | 4.083 | 0.848 | 3.00E-02 |
| Khynyn         | 5.124 | 4.991 | 5.306 | 4.178 | 4.589 | 4.143 | 0.847 | 4.15E-03 |
| Dbf4           | 2.403 | 2.367 | 2.469 | 1.561 | 1.865 | 1.904 | 0.845 | 4.94E-03 |
| Hltf           | 6.801 | 6.673 | 6.749 | 5.877 | 5.941 | 5.936 | 0.845 | 4.19E-04 |
| Cnbd2          | 1.848 | 1.728 | 2.292 | 1.368 | 1.341 | 1.438 | 0.844 | 7.74E-03 |
| Cercam         | 2.191 | 2.508 | 2.619 | 1.493 | 1.945 | 1.913 | 0.843 | 2.50E-02 |
| Dnajb3         | 2.938 | 2.918 | 3.654 | 2.111 | 2.493 | 2.783 | 0.841 | 2.98E-02 |
| Cct5           | 8.972 | 8.872 | 9.083 | 8.079 | 8.036 | 8.303 | 0.833 | 1.33E-03 |
| Ppme1          | 7.588 | 7.583 | 7.844 | 6.841 | 6.794 | 6.883 | 0.829 | 6.25E-04 |
| LOC362863      | 0.968 | 1.173 | 0.944 | 0.547 | 0.970 | 0.770 | 0.828 | 2.04E-02 |
| Mast3          | 3.990 | 4.175 | 4.840 | 3.077 | 3.791 | 3.816 | 0.826 | 1.14E-02 |
| Ntan1          | 7.972 | 7.966 | 7.987 | 7.502 | 7.166 | 7.026 | 0.824 | 6.46E-03 |
| Haus8          | 4.600 | 4.597 | 5.052 | 3.715 | 3.918 | 4.273 | 0.822 | 1.25E-03 |
| Xylb           | 4.340 | 4.639 | 5.142 | 3.422 | 3.968 | 4.356 | 0.821 | 3.47E-02 |
| Sdhaf4         | 7.094 | 7.234 | 7.371 | 6.385 | 6.201 | 6.653 | 0.820 | 2.69E-02 |
| AABR07058884.1 | 0.695 | 0.775 | 0.831 | 0.418 | 0.503 | 0.522 | 0.820 | 3.16E-02 |
| Mphosph9       | 3.703 | 3.818 | 4.117 | 2.895 | 3.171 | 3.408 | 0.819 | 6.47E-03 |
| lqcb1          | 5.598 | 5.712 | 5.972 | 4.936 | 4.995 | 4.992 | 0.819 | 8.18E-04 |
| Cept1          | 5.813 | 5.740 | 6.102 | 4.883 | 5.240 | 5.178 | 0.816 | 1.12E-04 |
| Ppm1m          | 2.137 | 2.283 | 2.605 | 1.323 | 1.698 | 2.119 | 0.814 | 4.58E-02 |
| Ncln           | 5.922 | 6.130 | 6.263 | 5.138 | 5.291 | 5.463 | 0.812 | 7.09E-05 |
| Nfatc3         | 4.256 | 4.353 | 4.823 | 3.629 | 3.715 | 3.909 | 0.812 | 2.50E-03 |
| Sync           | 5.021 | 4.919 | 5.209 | 4.023 | 4.308 | 4.496 | 0.811 | 4.12E-02 |
| Wfs1           | 2.988 | 3.247 | 3.615 | 2.523 | 2.642 | 2.566 | 0.811 | 1.93E-03 |
| Tmem206        | 5.031 | 5.040 | 5.563 | 4.115 | 4.457 | 4.723 | 0.809 | 2.87E-03 |
| LOC103689949   | 3.193 | 3.432 | 3.868 | 2.728 | 2.592 | 3.018 | 0.805 | 1.48E-02 |
| Nucb1          | 7.658 | 7.752 | 7.853 | 6.881 | 7.067 | 6.899 | 0.805 | 2.20E-04 |
| Cct6a          | 8.604 | 8.499 | 8.737 | 7.733 | 7.752 | 7.980 | 0.800 | 5.41E-04 |
| Rhof           | 3.888 | 3.681 | 4.313 | 3.125 | 3.121 | 3.457 | 0.799 | 2.14E-02 |

|              |       |       |       |       |       |       |       |          |
|--------------|-------|-------|-------|-------|-------|-------|-------|----------|
| Casp7        | 4.478 | 4.992 | 5.301 | 3.815 | 4.277 | 4.435 | 0.799 | 1.31E-02 |
| Wdr54        | 5.478 | 5.617 | 5.676 | 4.709 | 4.785 | 4.913 | 0.798 | 3.66E-03 |
| Tmem268      | 2.235 | 2.707 | 2.845 | 1.741 | 2.037 | 2.075 | 0.798 | 2.83E-03 |
| Arl6ip4      | 5.543 | 5.789 | 6.081 | 5.050 | 4.958 | 5.040 | 0.796 | 5.02E-03 |
| Inpp5a       | 5.321 | 5.381 | 5.821 | 4.632 | 4.638 | 4.936 | 0.795 | 4.87E-03 |
| Hacd3        | 7.280 | 7.274 | 7.607 | 6.472 | 6.592 | 6.754 | 0.795 | 2.79E-04 |
| Gorasp2      | 6.526 | 6.656 | 7.204 | 5.794 | 5.973 | 6.291 | 0.794 | 1.05E-03 |
| Orai3        | 3.042 | 3.400 | 3.526 | 2.299 | 2.853 | 2.719 | 0.794 | 9.60E-03 |
| Usp18        | 4.682 | 4.761 | 5.461 | 3.955 | 4.290 | 4.462 | 0.794 | 2.42E-02 |
| Ap5b1        | 2.858 | 3.315 | 3.620 | 2.382 | 2.612 | 2.760 | 0.790 | 6.30E-03 |
| Rasgef1a     | 3.955 | 4.020 | 4.634 | 3.250 | 3.475 | 3.730 | 0.790 | 6.74E-03 |
| Emc8         | 5.883 | 6.116 | 6.348 | 5.182 | 5.287 | 5.539 | 0.789 | 1.41E-04 |
| Atg3         | 7.485 | 7.422 | 7.750 | 6.617 | 6.917 | 6.892 | 0.789 | 1.50E-04 |
| Prkar1b      | 8.263 | 8.208 | 8.085 | 7.397 | 7.616 | 7.121 | 0.786 | 2.28E-02 |
| Ctr9         | 6.413 | 6.451 | 6.706 | 5.665 | 5.801 | 5.803 | 0.785 | 6.90E-05 |
| Popdc2       | 1.127 | 1.210 | 1.628 | 0.740 | 1.021 | 0.949 | 0.785 | 4.33E-02 |
| Smoc1        | 2.722 | 2.997 | 3.518 | 2.148 | 2.623 | 2.508 | 0.783 | 1.50E-02 |
| RGD1308106   | 5.456 | 5.619 | 6.066 | 4.944 | 4.952 | 5.106 | 0.782 | 6.26E-04 |
| Cers5        | 6.439 | 6.577 | 6.932 | 5.766 | 5.837 | 6.059 | 0.782 | 4.34E-04 |
| Socs1        | 3.080 | 2.977 | 3.308 | 2.086 | 2.320 | 2.864 | 0.781 | 2.83E-02 |
| Sin3b        | 7.381 | 7.665 | 7.901 | 6.810 | 6.910 | 6.890 | 0.772 | 1.13E-04 |
| Naa16        | 4.669 | 4.798 | 4.841 | 3.927 | 4.205 | 4.022 | 0.771 | 1.51E-04 |
| Clcn1        | 2.174 | 2.493 | 2.406 | 1.644 | 2.030 | 1.593 | 0.771 | 3.37E-02 |
| Nat6         | 4.567 | 4.940 | 4.763 | 3.894 | 4.159 | 3.993 | 0.770 | 4.91E-04 |
| Hs2st1       | 5.534 | 5.726 | 6.073 | 4.780 | 5.188 | 5.146 | 0.770 | 1.93E-04 |
| Me2          | 5.075 | 5.201 | 5.348 | 4.285 | 4.508 | 4.557 | 0.768 | 1.14E-04 |
| Wdr46        | 4.603 | 4.929 | 5.313 | 3.958 | 4.301 | 4.404 | 0.768 | 2.09E-03 |
| LOC100910854 | 3.495 | 3.703 | 4.171 | 2.840 | 3.007 | 3.443 | 0.768 | 4.61E-03 |
| Kcnc3        | 5.032 | 5.140 | 5.427 | 4.383 | 4.544 | 4.389 | 0.766 | 1.93E-04 |

|              |       |       |        |       |       |       |       |          |
|--------------|-------|-------|--------|-------|-------|-------|-------|----------|
| Robo1        | 2.718 | 2.681 | 3.427  | 2.112 | 2.387 | 2.484 | 0.765 | 4.28E-02 |
| Herc4        | 4.344 | 4.552 | 5.030  | 3.772 | 3.987 | 4.057 | 0.765 | 2.25E-03 |
| LOC102548695 | 3.971 | 4.046 | 4.400  | 3.402 | 3.522 | 3.375 | 0.765 | 1.35E-03 |
| Tmem51       | 3.603 | 3.629 | 3.915  | 2.832 | 3.148 | 3.116 | 0.765 | 2.53E-02 |
| Tut1         | 4.203 | 4.316 | 4.591  | 3.520 | 3.625 | 3.800 | 0.764 | 1.07E-03 |
| Tcp1         | 8.533 | 8.393 | 8.700  | 7.804 | 7.639 | 7.920 | 0.762 | 5.02E-03 |
| Parm1        | 3.856 | 4.150 | 4.183  | 3.293 | 3.417 | 3.366 | 0.762 | 5.96E-03 |
| Armcx6       | 4.222 | 4.659 | 4.594  | 3.800 | 3.957 | 3.483 | 0.761 | 3.25E-02 |
| Apip         | 3.866 | 3.993 | 4.472  | 3.105 | 3.619 | 3.544 | 0.761 | 6.07E-03 |
| Itpk1        | 5.720 | 5.663 | 5.905  | 4.703 | 4.901 | 5.391 | 0.760 | 7.80E-04 |
| Prox1        | 3.939 | 4.087 | 4.604  | 3.326 | 3.465 | 3.760 | 0.758 | 8.71E-03 |
| Grm1         | 3.792 | 3.804 | 4.283  | 3.172 | 3.381 | 3.252 | 0.758 | 8.64E-04 |
| Cand2        | 2.507 | 2.856 | 3.002  | 1.983 | 2.382 | 2.166 | 0.757 | 1.25E-02 |
| Sirt7        | 3.678 | 3.931 | 4.555  | 3.152 | 3.359 | 3.623 | 0.753 | 1.27E-02 |
| Stat1        | 6.333 | 6.229 | 6.330  | 5.453 | 5.732 | 5.478 | 0.752 | 1.22E-02 |
| Pir          | 5.200 | 5.361 | 5.505  | 4.409 | 4.733 | 4.771 | 0.749 | 3.91E-03 |
| Dalrd3       | 4.197 | 4.389 | 4.527  | 3.531 | 3.564 | 3.878 | 0.748 | 1.85E-03 |
| Plcd1        | 3.937 | 4.452 | 4.600  | 3.317 | 3.764 | 3.820 | 0.744 | 9.59E-03 |
| Lsm2         | 5.423 | 5.656 | 5.774  | 4.682 | 5.096 | 4.854 | 0.743 | 1.27E-03 |
| Zfp516       | 3.180 | 3.425 | 3.867  | 2.678 | 2.987 | 2.853 | 0.742 | 3.76E-02 |
| Celf6        | 3.997 | 4.255 | 4.692  | 3.555 | 3.745 | 3.591 | 0.741 | 6.30E-03 |
| Elob         | 9.900 | 9.985 | 10.150 | 9.277 | 9.286 | 9.252 | 0.741 | 3.47E-02 |
| Dnajb2       | 6.255 | 6.237 | 6.443  | 5.580 | 5.533 | 5.585 | 0.740 | 5.30E-03 |
| Cct2         | 8.464 | 8.360 | 8.522  | 7.717 | 7.651 | 7.777 | 0.740 | 4.30E-03 |
| Ift43        | 4.653 | 4.614 | 5.122  | 3.993 | 4.145 | 4.189 | 0.740 | 1.41E-02 |
| Spred3       | 4.593 | 4.758 | 4.873  | 3.653 | 3.786 | 4.239 | 0.739 | 2.02E-02 |
| Prkx         | 5.064 | 5.009 | 5.262  | 4.125 | 4.431 | 4.315 | 0.738 | 3.42E-05 |
| Maff         | 4.056 | 4.156 | 4.806  | 3.411 | 3.700 | 3.870 | 0.738 | 1.12E-02 |
| Stx2         | 4.379 | 4.777 | 4.930  | 3.624 | 4.297 | 4.160 | 0.736 | 1.86E-02 |

|              |       |       |       |       |       |       |       |          |
|--------------|-------|-------|-------|-------|-------|-------|-------|----------|
| Ccne2        | 4.763 | 4.788 | 5.219 | 4.072 | 4.441 | 4.227 | 0.735 | 1.90E-03 |
| Slc31a1      | 5.614 | 5.843 | 6.277 | 5.037 | 5.293 | 5.291 | 0.734 | 7.02E-04 |
| Cnpy4        | 4.515 | 4.674 | 5.122 | 3.786 | 4.035 | 4.389 | 0.734 | 6.49E-03 |
| Dhx29        | 4.353 | 4.291 | 4.742 | 3.670 | 3.655 | 4.009 | 0.734 | 1.77E-03 |
| Tmx1         | 8.371 | 8.216 | 8.555 | 7.615 | 7.640 | 7.749 | 0.733 | 8.47E-04 |
| Celf5        | 4.252 | 4.413 | 4.924 | 3.650 | 3.849 | 4.044 | 0.732 | 2.50E-03 |
| Fam118a      | 5.284 | 5.199 | 5.591 | 4.435 | 4.666 | 4.850 | 0.732 | 8.98E-04 |
| Slc25a29     | 4.517 | 4.860 | 5.188 | 3.765 | 4.005 | 4.637 | 0.729 | 1.79E-02 |
| Ptov1        | 7.863 | 7.908 | 8.006 | 7.232 | 7.156 | 7.159 | 0.729 | 8.64E-03 |
| Tmem33       | 5.912 | 5.763 | 6.046 | 5.033 | 5.342 | 5.245 | 0.728 | 3.40E-03 |
| LOC103692166 | 1.827 | 1.975 | 2.105 | 1.476 | 1.529 | 1.333 | 0.727 | 1.60E-02 |
| Eaf1         | 4.333 | 4.452 | 4.895 | 3.637 | 3.950 | 4.047 | 0.726 | 4.84E-04 |
| Lmnb2        | 4.239 | 4.290 | 4.722 | 3.593 | 3.730 | 3.872 | 0.726 | 3.59E-03 |
| Mafk         | 3.494 | 3.850 | 4.433 | 2.919 | 3.327 | 3.601 | 0.722 | 3.47E-02 |
| Baiap2       | 5.769 | 5.873 | 5.844 | 4.869 | 5.384 | 5.058 | 0.721 | 2.83E-04 |
| Dus2         | 4.046 | 4.299 | 4.574 | 3.514 | 3.836 | 3.545 | 0.720 | 6.09E-03 |
| Polr1c       | 5.790 | 5.919 | 6.270 | 5.229 | 5.135 | 5.426 | 0.719 | 1.72E-02 |
| Fam110a      | 2.720 | 2.478 | 2.876 | 1.957 | 2.146 | 2.220 | 0.718 | 9.53E-03 |
| Gas6         | 7.888 | 8.098 | 8.157 | 7.122 | 7.409 | 7.433 | 0.717 | 3.24E-04 |
| Nutf2        | 6.027 | 5.977 | 6.304 | 5.305 | 5.383 | 5.502 | 0.717 | 2.89E-03 |
| Paox         | 3.995 | 4.044 | 4.470 | 3.163 | 3.611 | 3.731 | 0.715 | 2.48E-03 |
| Tmem165      | 5.389 | 5.474 | 5.818 | 4.666 | 4.927 | 5.051 | 0.712 | 4.11E-03 |
| Umps         | 6.114 | 6.026 | 6.538 | 5.514 | 5.454 | 5.611 | 0.711 | 4.03E-03 |
| Nmt2         | 7.417 | 7.234 | 7.537 | 6.739 | 6.698 | 6.637 | 0.709 | 1.82E-03 |
| Rcc2         | 6.297 | 6.541 | 6.984 | 5.553 | 5.748 | 6.360 | 0.708 | 3.58E-02 |
| Gpr45        | 1.672 | 1.957 | 2.221 | 1.456 | 1.443 | 1.479 | 0.708 | 4.47E-02 |
| Vipr2        | 0.942 | 1.112 | 1.078 | 0.743 | 0.680 | 0.728 | 0.705 | 2.36E-02 |
| Eml2         | 5.500 | 5.481 | 5.665 | 4.839 | 4.892 | 4.794 | 0.704 | 5.04E-04 |
| RT1-CE6      | 3.217 | 3.726 | 3.837 | 2.591 | 3.310 | 2.935 | 0.703 | 3.71E-02 |

|            |       |       |       |       |       |       |       |          |
|------------|-------|-------|-------|-------|-------|-------|-------|----------|
| Gcsh       | 6.076 | 6.164 | 6.347 | 5.512 | 5.294 | 5.676 | 0.701 | 1.45E-02 |
| Tbc1d10a   | 4.177 | 4.240 | 4.750 | 3.509 | 3.631 | 4.033 | 0.700 | 3.86E-03 |
| Tmem120a   | 4.916 | 5.326 | 5.714 | 4.396 | 4.592 | 4.945 | 0.698 | 7.54E-03 |
| Ngdn       | 6.462 | 6.649 | 6.967 | 5.884 | 6.105 | 6.066 | 0.695 | 1.65E-03 |
| St6galnac6 | 5.244 | 5.253 | 5.727 | 4.649 | 4.669 | 4.872 | 0.695 | 2.14E-03 |
| Fut10      | 3.350 | 3.311 | 3.317 | 2.609 | 2.777 | 2.773 | 0.694 | 1.28E-02 |
| Rbm43      | 2.909 | 3.120 | 3.309 | 2.345 | 2.472 | 2.747 | 0.691 | 4.07E-03 |
| Tp53bp1    | 7.112 | 7.003 | 7.232 | 6.483 | 6.478 | 6.299 | 0.690 | 3.31E-03 |
| LOC498154  | 3.025 | 3.306 | 3.582 | 2.514 | 2.653 | 2.931 | 0.689 | 4.03E-03 |
| Zfp64      | 3.641 | 3.790 | 4.316 | 3.297 | 3.151 | 3.432 | 0.688 | 4.11E-02 |
| Gas8       | 3.439 | 3.363 | 3.833 | 2.627 | 3.006 | 3.165 | 0.686 | 2.47E-02 |
| Mknk2      | 5.683 | 5.827 | 6.254 | 4.905 | 5.247 | 5.563 | 0.685 | 5.29E-03 |
| Zfp717     | 5.812 | 5.983 | 6.215 | 5.201 | 5.447 | 5.404 | 0.684 | 7.17E-05 |
| Larp7      | 5.919 | 5.732 | 5.943 | 5.248 | 5.106 | 5.265 | 0.683 | 1.32E-02 |
| Ubl3       | 6.426 | 6.428 | 6.867 | 5.813 | 5.866 | 6.046 | 0.682 | 2.03E-03 |
| Naa50      | 5.422 | 5.817 | 6.414 | 5.002 | 5.577 | 5.579 | 0.681 | 3.98E-03 |
| Ttll5      | 4.238 | 4.154 | 4.290 | 3.517 | 3.731 | 3.545 | 0.680 | 2.18E-04 |
| Pigh       | 3.894 | 3.872 | 4.185 | 3.247 | 3.364 | 3.478 | 0.679 | 1.05E-02 |
| Phactr4    | 3.683 | 3.750 | 4.221 | 3.196 | 3.310 | 3.307 | 0.677 | 2.77E-02 |
| Recql4     | 1.125 | 1.062 | 1.455 | 0.749 | 0.892 | 0.967 | 0.677 | 1.60E-02 |
| RGD1310819 | 2.037 | 2.528 | 2.592 | 1.725 | 1.992 | 1.897 | 0.676 | 4.54E-02 |
| Med21      | 6.452 | 6.545 | 6.722 | 5.624 | 6.030 | 6.123 | 0.671 | 6.51E-03 |
| Cdc42ep4   | 4.317 | 4.362 | 4.695 | 3.588 | 4.032 | 3.826 | 0.671 | 1.44E-02 |
| Srp54a     | 7.017 | 6.870 | 7.337 | 6.352 | 6.418 | 6.516 | 0.670 | 4.18E-04 |
| Ntmt1      | 5.066 | 5.229 | 5.610 | 4.491 | 4.618 | 4.830 | 0.669 | 4.80E-03 |
| Mettl17    | 4.274 | 4.714 | 4.778 | 3.695 | 3.982 | 4.191 | 0.668 | 5.43E-03 |
| LOC361646  | 3.196 | 3.332 | 3.746 | 2.604 | 2.957 | 2.992 | 0.666 | 1.51E-02 |
| Shisa5     | 6.170 | 6.442 | 6.988 | 5.648 | 6.028 | 5.965 | 0.666 | 1.06E-02 |
| Suv39h2    | 3.091 | 3.257 | 3.433 | 2.700 | 2.679 | 2.518 | 0.666 | 1.09E-02 |

|           |       |       |       |       |       |       |       |          |
|-----------|-------|-------|-------|-------|-------|-------|-------|----------|
| Rnf144b   | 1.937 | 2.231 | 2.480 | 1.514 | 1.897 | 1.864 | 0.666 | 2.07E-02 |
| Ccdc32    | 5.368 | 5.401 | 5.756 | 4.794 | 4.906 | 4.896 | 0.665 | 8.88E-03 |
| Chp1      | 6.416 | 6.445 | 6.813 | 5.933 | 5.862 | 5.911 | 0.664 | 4.09E-03 |
| Ubxn4     | 6.605 | 6.687 | 6.951 | 5.982 | 6.135 | 6.205 | 0.660 | 1.17E-04 |
| Zfyve26   | 3.532 | 3.653 | 4.003 | 2.992 | 3.283 | 3.123 | 0.657 | 8.29E-03 |
| Napepld   | 2.590 | 2.771 | 3.170 | 1.914 | 2.498 | 2.452 | 0.657 | 4.70E-02 |
| Sema4b    | 3.116 | 3.331 | 3.931 | 2.640 | 2.755 | 3.246 | 0.656 | 3.80E-02 |
| Myt1l     | 5.571 | 5.486 | 6.021 | 4.813 | 5.066 | 5.310 | 0.654 | 4.66E-02 |
| Stip1     | 8.172 | 7.929 | 8.119 | 7.393 | 7.307 | 7.583 | 0.654 | 2.01E-02 |
| Lpgat1    | 5.493 | 5.371 | 5.828 | 4.807 | 4.909 | 5.105 | 0.653 | 2.31E-02 |
| Mcm9      | 3.030 | 3.105 | 3.276 | 2.471 | 2.654 | 2.603 | 0.652 | 2.97E-04 |
| Ino80e    | 5.112 | 5.201 | 5.643 | 4.607 | 4.604 | 4.838 | 0.651 | 1.13E-02 |
| Spats2l   | 5.429 | 5.677 | 5.905 | 4.767 | 5.140 | 5.219 | 0.650 | 1.08E-03 |
| Fchsd2    | 5.327 | 5.436 | 5.882 | 4.705 | 5.076 | 5.025 | 0.649 | 6.26E-04 |
| Ppox      | 3.918 | 4.196 | 4.467 | 3.567 | 3.676 | 3.517 | 0.648 | 2.21E-02 |
| Hyal3     | 4.112 | 4.379 | 4.325 | 3.611 | 3.692 | 3.684 | 0.648 | 2.06E-03 |
| LOC500077 | 3.503 | 3.467 | 3.775 | 2.991 | 2.868 | 3.117 | 0.647 | 2.48E-02 |
| Uba1      | 8.066 | 8.045 | 8.319 | 7.442 | 7.422 | 7.613 | 0.647 | 1.22E-03 |
| Idnk      | 3.230 | 3.598 | 3.360 | 2.642 | 2.925 | 2.920 | 0.645 | 1.49E-02 |
| Mrto4     | 5.320 | 5.556 | 5.781 | 4.654 | 4.849 | 5.241 | 0.644 | 1.12E-03 |
| Xpo1      | 6.955 | 7.068 | 7.399 | 6.241 | 6.447 | 6.850 | 0.643 | 5.74E-03 |
| Pnmal2    | 7.171 | 6.991 | 7.267 | 6.505 | 6.556 | 6.412 | 0.643 | 3.05E-03 |
| Pdxk      | 6.106 | 6.327 | 6.238 | 5.582 | 5.738 | 5.371 | 0.643 | 2.37E-02 |
| Gemin6    | 4.464 | 4.614 | 4.724 | 3.871 | 4.059 | 4.070 | 0.642 | 5.02E-03 |
| Tspyl2    | 6.121 | 6.393 | 6.234 | 5.414 | 5.848 | 5.616 | 0.639 | 9.97E-03 |
| Clk2      | 6.850 | 7.018 | 7.203 | 6.250 | 6.322 | 6.343 | 0.639 | 4.03E-03 |
| Pigl      | 3.453 | 3.838 | 3.738 | 2.822 | 3.199 | 3.269 | 0.638 | 7.85E-03 |
| Fam193a   | 5.385 | 5.482 | 5.846 | 4.863 | 5.011 | 4.999 | 0.638 | 1.91E-04 |
| Wdr35     | 4.205 | 4.366 | 4.630 | 3.390 | 3.981 | 4.037 | 0.635 | 6.21E-03 |

|          |       |       |       |       |       |       |       |          |
|----------|-------|-------|-------|-------|-------|-------|-------|----------|
| Camk2g   | 6.023 | 6.061 | 6.117 | 5.482 | 5.578 | 5.131 | 0.635 | 1.82E-02 |
| Lpin2    | 4.638 | 4.589 | 4.855 | 4.028 | 4.003 | 4.207 | 0.633 | 1.85E-03 |
| Qsox1    | 4.136 | 4.243 | 4.638 | 3.638 | 3.871 | 3.695 | 0.633 | 1.85E-02 |
| Adgrl2   | 5.267 | 5.739 | 5.936 | 4.768 | 5.048 | 5.318 | 0.633 | 8.32E-03 |
| Hspa4l   | 5.879 | 5.866 | 5.915 | 5.291 | 5.304 | 5.189 | 0.632 | 5.30E-03 |
| Dedd2    | 5.366 | 5.460 | 5.548 | 4.736 | 4.907 | 4.866 | 0.632 | 1.10E-03 |
| Paip1    | 7.391 | 7.390 | 7.781 | 6.761 | 6.874 | 7.050 | 0.630 | 5.76E-04 |
| Zfp174   | 1.832 | 1.878 | 2.200 | 1.419 | 1.583 | 1.592 | 0.630 | 4.60E-02 |
| Adcy6    | 5.170 | 5.099 | 5.485 | 4.570 | 4.675 | 4.648 | 0.630 | 1.93E-04 |
| Lsm1     | 5.456 | 5.423 | 5.770 | 4.810 | 4.974 | 5.045 | 0.629 | 2.73E-03 |
| Akr1a1   | 9.504 | 9.508 | 9.733 | 9.006 | 8.834 | 8.981 | 0.629 | 2.19E-02 |
| H2afx    | 5.673 | 5.733 | 6.154 | 5.052 | 5.218 | 5.438 | 0.628 | 1.53E-02 |
| Ybx3     | 6.148 | 6.342 | 6.999 | 5.607 | 5.887 | 6.293 | 0.628 | 4.77E-02 |
| Ero1a    | 5.243 | 5.128 | 5.523 | 4.544 | 4.674 | 4.891 | 0.628 | 1.49E-02 |
| Prkra    | 6.262 | 6.408 | 6.763 | 5.788 | 5.882 | 5.941 | 0.627 | 9.11E-03 |
| Preli1   | 7.695 | 7.803 | 8.053 | 7.136 | 7.040 | 7.421 | 0.627 | 1.14E-02 |
| Fbxl19   | 5.330 | 5.511 | 5.712 | 4.882 | 4.921 | 4.866 | 0.626 | 2.32E-03 |
| Sorcs3   | 3.600 | 3.645 | 3.986 | 3.092 | 3.216 | 3.230 | 0.625 | 2.71E-03 |
| Zswim8   | 5.083 | 4.931 | 5.307 | 4.406 | 4.371 | 4.711 | 0.624 | 9.12E-04 |
| Syt6     | 4.118 | 4.279 | 4.323 | 3.294 | 3.919 | 3.763 | 0.623 | 1.74E-02 |
| Atp2c1   | 7.333 | 7.502 | 7.532 | 6.731 | 6.962 | 6.833 | 0.623 | 7.45E-04 |
| Mcm4     | 6.811 | 6.779 | 6.887 | 6.079 | 6.339 | 6.238 | 0.621 | 2.57E-04 |
| Ppid     | 7.994 | 7.750 | 8.094 | 7.237 | 7.270 | 7.513 | 0.619 | 1.41E-03 |
| Stim1    | 5.206 | 5.396 | 5.613 | 4.666 | 4.959 | 4.794 | 0.617 | 3.67E-04 |
| Naglu    | 3.599 | 4.018 | 4.206 | 3.169 | 3.357 | 3.601 | 0.613 | 6.17E-03 |
| Tiam2    | 3.348 | 3.584 | 4.057 | 3.054 | 2.992 | 3.321 | 0.611 | 2.28E-02 |
| Zfp511   | 4.526 | 4.629 | 5.076 | 4.023 | 4.055 | 4.406 | 0.610 | 3.76E-02 |
| Tube1    | 3.882 | 4.025 | 4.260 | 3.186 | 3.788 | 3.480 | 0.610 | 1.90E-02 |
| Tmem200a | 3.131 | 2.868 | 3.155 | 2.423 | 2.538 | 2.657 | 0.609 | 3.80E-02 |



|                |        |       |       |       |       |       |       |          |
|----------------|--------|-------|-------|-------|-------|-------|-------|----------|
| Sufu           | 3.855  | 4.047 | 4.332 | 3.408 | 3.654 | 3.467 | 0.609 | 1.48E-02 |
| Zmynd19        | 6.191  | 6.022 | 6.501 | 5.566 | 5.444 | 5.900 | 0.608 | 1.17E-02 |
| Gpr68          | 5.285  | 5.415 | 5.953 | 5.005 | 4.876 | 4.997 | 0.606 | 1.96E-02 |
| Maneal         | 5.299  | 5.338 | 5.795 | 4.836 | 4.875 | 4.951 | 0.603 | 7.04E-03 |
| LOC102550456   | 4.437  | 4.399 | 4.640 | 3.529 | 3.734 | 3.828 | 0.602 | 3.46E-02 |
| RGD1309995     | 6.315  | 6.354 | 6.576 | 5.628 | 5.975 | 5.901 | 0.601 | 3.07E-02 |
| Cdan1          | 3.980  | 4.089 | 4.403 | 3.494 | 3.649 | 3.641 | 0.601 | 6.66E-03 |
| Stk11ip        | 5.015  | 5.146 | 5.273 | 4.438 | 4.563 | 4.674 | 0.600 | 5.07E-03 |
| Atg9a          | 6.529  | 6.604 | 6.786 | 6.015 | 6.163 | 5.915 | 0.600 | 8.90E-03 |
| Nit1           | 6.500  | 6.690 | 6.714 | 6.038 | 6.191 | 5.856 | 0.599 | 2.85E-02 |
| Ino80c         | 5.162  | 5.306 | 5.559 | 4.575 | 4.793 | 4.942 | 0.599 | 4.48E-04 |
| Mfsd14b        | 5.012  | 5.044 | 5.409 | 4.365 | 4.684 | 4.713 | 0.599 | 5.33E-04 |
| Cpped1         | 4.684  | 4.758 | 4.599 | 4.057 | 4.312 | 3.945 | 0.598 | 8.17E-03 |
| Skp1           | 10.028 | 9.947 | 9.937 | 9.414 | 9.363 | 9.337 | 0.598 | 2.68E-02 |
| Fndc4          | 5.472  | 5.744 | 6.147 | 5.207 | 5.224 | 5.201 | 0.596 | 1.96E-02 |
| AABR07071395.1 | 4.275  | 4.194 | 3.996 | 3.327 | 3.664 | 3.805 | 0.594 | 3.36E-02 |
| Dnttip1        | 6.052  | 6.286 | 6.348 | 5.549 | 5.741 | 5.689 | 0.594 | 8.88E-03 |
| Creb3          | 6.535  | 6.739 | 7.076 | 6.210 | 6.159 | 6.205 | 0.592 | 1.61E-02 |
| Dnaja1         | 9.203  | 9.055 | 9.201 | 8.498 | 8.524 | 8.704 | 0.592 | 1.43E-03 |
| Kat7           | 6.515  | 6.624 | 6.925 | 6.064 | 6.103 | 6.154 | 0.592 | 8.59E-04 |
| Tpm3           | 7.389  | 7.507 | 7.923 | 6.863 | 7.011 | 7.244 | 0.591 | 8.13E-03 |
| Fam217b        | 2.724  | 2.857 | 3.409 | 2.332 | 2.767 | 2.561 | 0.591 | 1.16E-02 |
| LOC100912481   | 7.769  | 7.955 | 8.082 | 7.157 | 7.412 | 7.449 | 0.591 | 1.56E-04 |
| Ccdc25         | 5.661  | 5.489 | 5.967 | 4.980 | 5.059 | 5.376 | 0.590 | 1.57E-02 |
| Gon4l          | 4.709  | 4.736 | 5.174 | 4.223 | 4.328 | 4.572 | 0.589 | 1.05E-02 |
| Rnf41          | 6.900  | 6.981 | 7.375 | 6.445 | 6.514 | 6.575 | 0.589 | 3.36E-03 |
| Gpn1           | 5.913  | 6.065 | 6.315 | 5.462 | 5.482 | 5.626 | 0.589 | 8.79E-04 |
| Lysmd2         | 5.914  | 5.797 | 6.201 | 5.273 | 5.442 | 5.529 | 0.589 | 1.53E-02 |
| Syt4           | 7.090  | 7.130 | 7.300 | 6.494 | 6.543 | 6.735 | 0.588 | 7.54E-03 |

|              |       |       |       |       |       |       |        |          |
|--------------|-------|-------|-------|-------|-------|-------|--------|----------|
| Canx         | 8.926 | 8.829 | 9.133 | 8.203 | 8.389 | 8.568 | 0.588  | 4.19E-03 |
| Bhlhe22      | 4.703 | 4.592 | 4.925 | 3.997 | 4.166 | 4.382 | 0.588  | 2.72E-02 |
| Efh2         | 5.692 | 5.946 | 6.208 | 5.104 | 5.447 | 5.549 | 0.587  | 1.24E-02 |
| Sp110        | 5.021 | 5.295 | 5.489 | 4.591 | 4.851 | 4.658 | 0.587  | 4.09E-02 |
| Cep83        | 3.828 | 3.770 | 3.722 | 4.352 | 4.333 | 4.370 | -0.588 | 2.07E-02 |
| LOC100911660 | 2.658 | 2.507 | 2.332 | 2.593 | 3.389 | 3.139 | -0.591 | 3.91E-02 |
| Reep1        | 5.509 | 5.556 | 5.433 | 6.095 | 6.049 | 6.113 | -0.598 | 8.88E-03 |
| Kndc1        | 2.143 | 1.974 | 2.213 | 2.472 | 2.640 | 2.663 | -0.599 | 1.85E-02 |
| Rad51d       | 3.220 | 3.440 | 3.356 | 3.774 | 4.016 | 3.855 | -0.600 | 1.26E-02 |
| Ppp1r14c     | 3.234 | 3.162 | 3.442 | 3.558 | 3.935 | 4.011 | -0.603 | 4.30E-03 |
| Rftn1        | 3.917 | 3.888 | 4.103 | 4.325 | 4.518 | 4.772 | -0.604 | 4.19E-03 |
| Sfrp2        | 5.126 | 4.987 | 5.015 | 5.602 | 5.555 | 5.758 | -0.607 | 2.27E-02 |
| Lmo4         | 4.637 | 4.946 | 4.994 | 5.167 | 5.530 | 5.586 | -0.608 | 1.11E-03 |
| Nrp2         | 4.346 | 4.471 | 4.103 | 4.798 | 4.978 | 4.930 | -0.608 | 8.45E-03 |
| Zfp608       | 3.051 | 3.028 | 3.044 | 3.595 | 3.550 | 3.630 | -0.614 | 5.07E-03 |
| St6galnac3   | 1.335 | 1.262 | 1.390 | 1.541 | 1.824 | 1.827 | -0.617 | 4.27E-02 |
| Ndr1         | 3.909 | 4.222 | 4.108 | 4.677 | 4.669 | 4.804 | -0.617 | 1.35E-02 |
| Adcy5        | 2.592 | 2.617 | 2.636 | 2.953 | 3.283 | 3.202 | -0.624 | 1.65E-03 |
| B3gat1       | 4.227 | 4.227 | 4.217 | 4.777 | 4.775 | 4.897 | -0.624 | 6.53E-03 |
| St6gal1      | 3.209 | 3.194 | 3.576 | 3.663 | 3.840 | 4.221 | -0.627 | 3.14E-03 |
| Mtus1        | 6.753 | 6.609 | 6.489 | 7.453 | 7.324 | 7.256 | -0.636 | 2.47E-02 |
| Lrrk2        | 1.336 | 1.482 | 1.306 | 1.629 | 2.050 | 1.722 | -0.636 | 4.65E-02 |
| Sh3d19       | 3.362 | 3.719 | 3.955 | 4.210 | 4.548 | 4.506 | -0.646 | 9.56E-04 |
| Tspan2       | 3.145 | 2.804 | 3.250 | 3.646 | 3.566 | 3.799 | -0.649 | 1.42E-02 |
| Bub1         | 1.798 | 1.630 | 1.899 | 2.039 | 2.356 | 2.454 | -0.652 | 2.75E-02 |
| Grhpr        | 2.628 | 2.819 | 2.933 | 2.901 | 3.730 | 3.438 | -0.654 | 2.70E-02 |
| Dhrs1        | 3.210 | 3.702 | 3.194 | 3.793 | 4.161 | 3.981 | -0.654 | 2.22E-02 |
| Fhl2         | 1.736 | 1.952 | 2.143 | 2.149 | 2.392 | 2.796 | -0.657 | 4.35E-02 |
| Zfp40        | 4.579 | 4.463 | 4.338 | 4.967 | 5.203 | 5.229 | -0.658 | 6.13E-03 |

|          |       |       |       |       |       |       |        |          |
|----------|-------|-------|-------|-------|-------|-------|--------|----------|
| Manba    | 3.154 | 3.291 | 3.057 | 3.674 | 4.026 | 3.608 | -0.664 | 1.61E-02 |
| Ifngr1   | 3.510 | 3.942 | 4.150 | 4.120 | 4.490 | 4.882 | -0.675 | 7.00E-03 |
| Ece2     | 2.198 | 2.241 | 2.274 | 2.588 | 2.926 | 2.857 | -0.676 | 1.56E-03 |
| Nacc2    | 2.209 | 2.358 | 2.368 | 2.550 | 3.040 | 3.094 | -0.677 | 4.22E-02 |
| Cdc25b   | 2.688 | 2.917 | 2.777 | 3.055 | 3.469 | 3.636 | -0.680 | 5.90E-03 |
| Tmem35b  | 2.004 | 2.007 | 2.393 | 2.453 | 2.739 | 2.902 | -0.682 | 3.88E-02 |
| Plppr3   | 3.416 | 3.893 | 4.257 | 4.098 | 4.525 | 4.885 | -0.690 | 2.30E-02 |
| Slc16a2  | 1.178 | 1.897 | 1.589 | 1.761 | 2.219 | 2.208 | -0.692 | 4.27E-02 |
| Mycn     | 1.289 | 1.460 | 1.517 | 1.630 | 1.893 | 2.133 | -0.694 | 4.04E-02 |
| Bmp1     | 3.437 | 3.808 | 3.833 | 3.832 | 4.595 | 4.534 | -0.694 | 9.27E-03 |
| Sybu     | 3.086 | 2.580 | 2.634 | 3.453 | 3.324 | 3.430 | -0.695 | 4.35E-02 |
| Zfp78    | 2.848 | 2.592 | 2.527 | 3.247 | 3.364 | 3.239 | -0.697 | 1.27E-02 |
| Slc35b2  | 3.815 | 4.008 | 3.923 | 4.411 | 4.591 | 4.710 | -0.698 | 3.67E-04 |
| Nrbp2    | 5.720 | 5.935 | 5.469 | 6.403 | 6.549 | 6.256 | -0.698 | 1.89E-02 |
| Slc25a27 | 4.974 | 4.620 | 4.624 | 5.537 | 5.445 | 5.323 | -0.710 | 2.68E-02 |
| Cgnl1    | 3.818 | 3.557 | 3.495 | 4.373 | 4.438 | 4.030 | -0.711 | 3.16E-02 |
| Impa2    | 2.984 | 3.670 | 3.469 | 3.639 | 4.187 | 3.901 | -0.713 | 1.18E-02 |
| Cryl1    | 2.495 | 2.683 | 2.303 | 2.805 | 3.450 | 3.057 | -0.713 | 4.30E-02 |
| Adgrb2   | 3.577 | 3.478 | 3.844 | 3.871 | 4.204 | 4.741 | -0.714 | 2.15E-02 |
| Adamts10 | 3.059 | 3.308 | 2.801 | 3.391 | 3.885 | 3.587 | -0.728 | 1.56E-02 |
| C1qtnf3  | 3.484 | 3.384 | 3.129 | 3.970 | 4.077 | 4.012 | -0.729 | 1.03E-02 |
| Anapc16  | 5.056 | 5.019 | 5.036 | 5.654 | 5.794 | 5.818 | -0.731 | 8.58E-04 |
| Nim1k    | 1.241 | 1.873 | 1.291 | 1.689 | 2.184 | 2.179 | -0.744 | 4.93E-02 |
| Sertm1   | 1.878 | 2.090 | 1.797 | 2.180 | 2.731 | 2.622 | -0.746 | 1.08E-02 |
| Sncaip   | 3.142 | 3.029 | 3.190 | 3.611 | 3.740 | 4.070 | -0.750 | 2.32E-03 |
| Sertad4  | 3.099 | 2.820 | 3.041 | 3.548 | 3.693 | 3.724 | -0.755 | 1.09E-03 |
| Gadd45a  | 5.042 | 5.384 | 5.097 | 5.451 | 6.262 | 6.030 | -0.759 | 4.87E-03 |
| Elmod1   | 4.172 | 4.129 | 3.972 | 4.872 | 4.916 | 4.698 | -0.760 | 6.19E-03 |
| Osbp15   | 1.622 | 1.612 | 2.015 | 1.928 | 2.399 | 2.663 | -0.765 | 2.23E-02 |

|              |       |       |       |       |       |       |        |          |
|--------------|-------|-------|-------|-------|-------|-------|--------|----------|
| Gas2l1       | 2.137 | 1.950 | 2.264 | 2.512 | 2.729 | 2.962 | -0.766 | 1.09E-02 |
| Myo1b        | 2.657 | 3.036 | 3.154 | 3.427 | 3.741 | 3.783 | -0.769 | 3.46E-03 |
| Itgad        | 1.499 | 1.944 | 1.830 | 2.141 | 2.471 | 2.429 | -0.770 | 4.84E-02 |
| Prkar2b      | 4.682 | 4.779 | 4.844 | 5.364 | 5.244 | 5.936 | -0.774 | 2.65E-03 |
| Glrx         | 5.426 | 5.418 | 5.204 | 6.019 | 6.373 | 5.982 | -0.782 | 8.74E-03 |
| Tex14        | 2.536 | 2.309 | 2.480 | 3.181 | 3.057 | 3.107 | -0.784 | 2.32E-02 |
| Rgs10        | 4.173 | 4.651 | 4.226 | 5.103 | 5.218 | 5.046 | -0.789 | 3.80E-02 |
| Fbxo44       | 4.144 | 4.331 | 3.921 | 4.806 | 5.119 | 4.736 | -0.791 | 3.11E-02 |
| Cdh20        | 3.133 | 3.207 | 3.179 | 3.748 | 3.828 | 4.116 | -0.793 | 1.56E-03 |
| Nxph4        | 2.612 | 3.008 | 3.220 | 3.269 | 3.755 | 3.912 | -0.794 | 3.48E-02 |
| Fam163a      | 1.586 | 1.494 | 1.455 | 2.096 | 2.216 | 1.863 | -0.796 | 9.51E-03 |
| Gls2         | 2.756 | 2.912 | 2.917 | 3.653 | 3.657 | 3.328 | -0.798 | 2.44E-03 |
| Cttnbp2      | 2.715 | 2.946 | 3.022 | 3.204 | 3.843 | 3.768 | -0.802 | 9.28E-03 |
| Scn1a        | 3.738 | 3.759 | 3.225 | 4.167 | 4.620 | 4.276 | -0.808 | 4.22E-02 |
| LOC497940    | 2.613 | 2.959 | 2.520 | 3.290 | 3.687 | 3.258 | -0.809 | 4.98E-02 |
| Cldn11       | 3.135 | 3.009 | 3.192 | 3.632 | 3.856 | 4.055 | -0.811 | 1.84E-02 |
| Serpini1     | 4.520 | 4.709 | 4.415 | 5.250 | 5.569 | 5.230 | -0.814 | 1.76E-03 |
| Chrd         | 1.727 | 1.825 | 1.741 | 2.370 | 2.405 | 2.356 | -0.819 | 2.81E-03 |
| Ctgf         | 1.998 | 2.435 | 1.787 | 2.410 | 2.830 | 3.042 | -0.820 | 4.67E-02 |
| LOC103692165 | 1.631 | 1.538 | 1.856 | 2.044 | 2.340 | 2.473 | -0.826 | 8.86E-03 |
| Bcas1        | 4.168 | 4.197 | 4.242 | 4.636 | 4.966 | 5.354 | -0.830 | 5.59E-04 |
| Trpv2        | 2.059 | 2.204 | 2.634 | 2.798 | 2.949 | 3.237 | -0.830 | 9.81E-03 |
| Camk1g       | 0.915 | 1.308 | 1.143 | 1.294 | 1.797 | 1.656 | -0.838 | 3.92E-02 |
| Nfkbie       | 2.924 | 3.185 | 3.428 | 3.637 | 3.943 | 4.254 | -0.848 | 1.18E-03 |
| Smad9        | 1.213 | 1.428 | 1.480 | 1.637 | 2.056 | 2.157 | -0.850 | 9.51E-03 |
| LOC100359539 | 1.772 | 1.921 | 2.045 | 2.176 | 2.682 | 2.877 | -0.852 | 1.74E-02 |
| Tspan12      | 3.430 | 3.886 | 3.834 | 4.040 | 4.560 | 4.970 | -0.863 | 7.66E-03 |
| Dlc1         | 2.769 | 3.043 | 2.923 | 3.355 | 3.849 | 3.991 | -0.865 | 1.19E-03 |
| RGD1311575   | 2.566 | 2.661 | 3.158 | 3.044 | 3.647 | 3.994 | -0.874 | 2.92E-02 |

|                |       |       |       |       |       |       |        |          |
|----------------|-------|-------|-------|-------|-------|-------|--------|----------|
| Slc8a1         | 3.048 | 2.898 | 3.291 | 3.765 | 3.828 | 4.047 | -0.876 | 2.93E-02 |
| Olig1          | 2.962 | 2.829 | 3.144 | 3.398 | 3.868 | 4.015 | -0.879 | 1.62E-02 |
| Mfsd4          | 2.763 | 2.988 | 2.625 | 3.584 | 3.825 | 3.317 | -0.882 | 1.23E-02 |
| Rarb           | 2.191 | 1.565 | 1.827 | 2.671 | 2.222 | 2.832 | -0.895 | 3.38E-02 |
| Bmp4           | 0.891 | 0.947 | 1.084 | 1.493 | 1.296 | 1.634 | -0.896 | 4.50E-02 |
| Slitrk3        | 1.273 | 1.402 | 1.492 | 2.118 | 2.045 | 1.804 | -0.898 | 3.65E-02 |
| Podxl          | 1.076 | 1.734 | 1.587 | 1.736 | 2.134 | 2.175 | -0.899 | 8.29E-03 |
| Tmem200c       | 1.866 | 1.989 | 1.976 | 2.326 | 2.706 | 2.903 | -0.900 | 1.48E-03 |
| Nrep           | 6.952 | 7.230 | 6.744 | 7.838 | 8.157 | 7.725 | -0.924 | 2.35E-02 |
| Adamtsl4       | 0.713 | 1.110 | 0.939 | 1.109 | 1.707 | 1.458 | -0.931 | 3.35E-02 |
| Ccdc177        | 1.054 | 1.006 | 0.967 | 1.253 | 1.754 | 1.653 | -0.932 | 2.92E-02 |
| 43170          | 1.275 | 1.166 | 1.139 | 1.788 | 1.824 | 1.788 | -0.939 | 2.78E-02 |
| Stmn4          | 6.589 | 6.248 | 6.522 | 7.451 | 7.286 | 7.378 | -0.941 | 2.77E-02 |
| Tmem229a       | 1.267 | 1.402 | 0.874 | 1.846 | 1.792 | 1.823 | -0.950 | 2.41E-02 |
| Kif22          | 1.452 | 1.776 | 2.016 | 2.043 | 2.415 | 2.928 | -0.952 | 1.17E-02 |
| Sytl2          | 0.953 | 1.470 | 1.128 | 1.592 | 2.104 | 1.811 | -0.958 | 3.22E-02 |
| Thsd7b         | 0.848 | 1.330 | 0.954 | 1.299 | 1.639 | 1.967 | -0.975 | 3.38E-02 |
| Mdga2          | 2.021 | 2.480 | 2.233 | 2.708 | 3.264 | 3.260 | -0.980 | 3.23E-02 |
| Samd11         | 2.063 | 2.548 | 2.003 | 2.806 | 3.289 | 3.037 | -0.992 | 9.47E-03 |
| AABR07036331.2 | 1.465 | 1.859 | 1.497 | 2.268 | 2.334 | 2.456 | -0.992 | 1.52E-02 |
| Rasgrf2        | 1.291 | 1.147 | 1.376 | 1.825 | 2.012 | 2.019 | -1.011 | 6.55E-03 |
| Tshr           | 0.781 | 0.869 | 0.883 | 1.383 | 1.323 | 1.434 | -1.018 | 1.34E-03 |
| Rfx8           | 0.515 | 0.531 | 0.614 | 0.710 | 1.279 | 0.900 | -1.032 | 4.62E-02 |
| Gpr22          | 1.070 | 0.979 | 1.063 | 1.435 | 1.992 | 1.579 | -1.035 | 1.48E-02 |
| Sema3g         | 1.220 | 1.450 | 1.189 | 1.569 | 2.526 | 1.701 | -1.037 | 4.35E-02 |
| Cpne7          | 2.503 | 2.091 | 2.152 | 2.800 | 2.938 | 3.595 | -1.042 | 8.78E-03 |
| LOC100910438   | 2.397 | 2.491 | 1.906 | 3.169 | 3.136 | 3.331 | -1.077 | 9.42E-03 |
| Slc6a7         | 1.426 | 1.432 | 1.679 | 2.010 | 2.439 | 2.340 | -1.095 | 1.86E-02 |
| P2rx2          | 1.502 | 1.936 | 1.807 | 2.016 | 2.672 | 3.258 | -1.103 | 1.22E-02 |

|                |       |       |       |       |       |       |        |          |
|----------------|-------|-------|-------|-------|-------|-------|--------|----------|
| Spc25          | 0.980 | 1.391 | 1.649 | 1.674 | 2.384 | 2.305 | -1.109 | 3.39E-02 |
| Hey1           | 1.650 | 1.572 | 1.741 | 2.111 | 2.660 | 2.773 | -1.150 | 6.45E-03 |
| Cdkn2a         | 1.362 | 2.318 | 1.876 | 2.550 | 2.941 | 3.087 | -1.211 | 1.46E-02 |
| NEWGENE_621438 | 0.263 | 0.552 | 0.457 | 0.569 | 0.924 | 1.044 | -1.213 | 4.20E-02 |
| Cdca3          | 0.971 | 0.903 | 1.330 | 1.655 | 1.843 | 2.037 | -1.232 | 3.22E-02 |
| Ldb2           | 0.251 | 0.208 | 0.413 | 0.599 | 0.704 | 0.684 | -1.289 | 4.77E-02 |
| Spag6l         | 0.594 | 0.332 | 0.518 | 0.708 | 1.151 | 1.132 | -1.295 | 4.68E-02 |
| Trib3          | 1.198 | 1.701 | 1.998 | 2.240 | 2.811 | 3.057 | -1.390 | 8.18E-04 |
| Akr1b10        | 3.363 | 3.928 | 2.763 | 4.423 | 5.261 | 4.908 | -1.395 | 3.36E-02 |
| Iqcd           | 0.611 | 0.900 | 0.708 | 1.238 | 1.582 | 1.663 | -1.410 | 3.15E-02 |
| Tagln          | 0.670 | 1.671 | 1.736 | 1.973 | 2.502 | 3.059 | -1.547 | 3.10E-02 |
| Grip2          | 0.511 | 0.636 | 0.467 | 1.261 | 1.158 | 1.150 | -1.607 | 4.41E-04 |
| Myo1f          | 0.231 | 0.210 | 0.383 | 0.546 | 0.745 | 1.070 | -1.804 | 8.39E-03 |
| Etfbkmt        | 0.615 | 0.823 | 0.769 | 1.101 | 2.016 | 2.111 | -1.845 | 7.28E-03 |
| Depdc1         | 0.142 | 0.099 | 0.463 | 0.694 | 0.864 | 0.639 | -1.860 | 4.68E-02 |
| Cyp1a1         | 0.234 | 0.646 | 0.581 | 1.023 | 1.718 | 1.519 | -2.048 | 1.46E-02 |
| Scn5a          | 0.098 | 0.088 | 0.294 | 0.252 | 0.637 | 0.620 | -2.128 | 3.58E-02 |
| RGD1309870     | 0.384 | 0.559 | 0.456 | 0.566 | 1.983 | 2.552 | -2.248 | 4.72E-02 |
| Mmp13          | 0.198 | 0.337 | 0.290 | 0.690 | 1.453 | 0.893 | -2.282 | 3.40E-03 |
| Slc40a1        | 0.300 | 0.304 | 0.576 | 0.555 | 1.449 | 1.647 | -2.354 | 2.14E-02 |
| Mmp3           | 0.727 | 0.884 | 2.035 | 2.603 | 3.840 | 2.786 | -2.447 | 1.88E-02 |
| Hist1h2an      | 0.742 | 1.189 | 1.998 | 2.040 | 3.613 | 3.843 | -2.448 | 8.02E-03 |
| Mmp10          | 0.138 | 0.000 | 0.318 | 0.518 | 1.073 | 0.848 | -2.722 | 1.60E-02 |
| AABR07057333.1 | 0.000 | 0.000 | 0.000 | 1.183 | 0.000 | 2.490 | -7.122 | 3.06E-02 |

**Table S2. HSF1-regulated genes in apoptotic CGNs**

Expression level (log<sub>2</sub>-transformed) of the HSF1 targets under LK condition in HSF1-expressing and GFP-expressing CGNs is listed along with log<sub>2</sub> [fold change] and FDR. Novel targets of HSF1 are in blue.

**Table S2. HSF1-regulated genes in apoptotic CGNs**

| Genes          | HSF1 LK-1 | HSF1 LK-2 | HSF1 LK-3 | GFP LK-1 | GFP LK-2 | GFP LK-3 | Log2[fold change] | FDR      |
|----------------|-----------|-----------|-----------|----------|----------|----------|-------------------|----------|
| AABR07069837.1 | 4.126     | 4.148     | 4.427     | 0.274    | 0.000    | 0.000    | 7.155             | 4.27E-05 |
| Rbm12          | 2.689     | 3.843     | 3.793     | 0.142    | 0.081    | 0.140    | 6.748             | 3.05E-02 |
| AABR07016950.1 | 5.559     | 5.754     | 6.668     | 0.000    | 1.241    | 1.068    | 6.335             | 1.40E-03 |
| AABR07069913.1 | 3.659     | 3.022     | 3.685     | 0.000    | 0.000    | 0.485    | 6.245             | 1.41E-03 |
| AABR07069821.1 | 3.263     | 3.520     | 4.327     | 0.157    | 0.411    | 0.000    | 6.217             | 1.40E-04 |
| Dmrt1          | 1.410     | 1.275     | 2.791     | 0.114    | 0.000    | 0.000    | 5.998             | 2.24E-03 |
| RGD1560554     | 2.776     | 2.809     | 2.706     | 0.182    | 0.252    | 0.000    | 5.501             | 1.58E-03 |
| LOC102546495   | 2.879     | 3.044     | 3.709     | 0.254    | 0.375    | 0.000    | 5.376             | 4.34E-03 |
| LOC100360908   | 1.452     | 2.153     | 2.995     | 0.072    | 0.000    | 0.281    | 5.321             | 7.30E-03 |
| AABR07016976.1 | 6.045     | 6.156     | 7.013     | 1.500    | 1.608    | 2.105    | 5.122             | 2.54E-04 |
| Acan           | 1.009     | 1.109     | 1.595     | 0.036    | 0.067    | 0.066    | 5.117             | 1.20E-04 |
| Slc34a2        | 1.263     | 1.463     | 2.521     | 0.111    | 0.154    | 0.026    | 5.060             | 3.14E-04 |
| LOC102546376   | 5.195     | 5.555     | 6.129     | 1.669    | 0.797    | 1.241    | 4.940             | 8.31E-03 |
| Zfp93          | 2.526     | 2.216     | 3.682     | 0.188    | 0.397    | 0.347    | 4.730             | 4.23E-05 |
| Alx4           | 2.596     | 2.763     | 3.674     | 0.089    | 0.488    | 0.482    | 4.705             | 1.15E-03 |
| Pax7           | 2.954     | 2.643     | 3.979     | 0.209    | 0.470    | 0.572    | 4.644             | 2.54E-04 |
| AABR07060481.1 | 2.797     | 2.874     | 3.262     | 0.148    | 0.000    | 0.801    | 4.601             | 2.23E-02 |
| LOC102550797   | 3.392     | 3.047     | 3.990     | 0.856    | 0.426    | 0.000    | 4.463             | 7.92E-03 |
| Apob           | 0.535     | 0.343     | 0.600     | 0.007    | 0.067    | 0.010    | 4.359             | 1.83E-02 |
| AABR07016919.1 | 4.318     | 4.213     | 5.037     | 0.813    | 1.446    | 1.313    | 4.080             | 1.15E-03 |
| Fbxw10         | 0.939     | 0.852     | 1.386     | 0.058    | 0.122    | 0.082    | 4.054             | 1.15E-03 |
| RGD1562660     | 5.902     | 5.525     | 6.864     | 2.543    | 0.000    | 3.021    | 4.035             | 4.34E-03 |
| Nmb            | 4.949     | 5.334     | 5.745     | 1.738    | 1.502    | 1.981    | 4.012             | 3.22E-07 |
| Igfbpl1        | 4.269     | 4.195     | 5.171     | 0.994    | 1.308    | 1.500    | 3.989             | 8.04E-05 |
| Plac9          | 1.958     | 3.121     | 3.217     | 0.221    | 0.766    | 0.429    | 3.903             | 1.12E-03 |
| AABR07068094.2 | 2.287     | 2.871     | 3.582     | 0.342    | 0.870    | 0.465    | 3.828             | 8.09E-03 |
| Batf           | 1.722     | 1.479     | 1.866     | 0.105    | 0.280    | 0.276    | 3.648             | 4.30E-03 |



|                |       |       |       |       |       |       |       |          |
|----------------|-------|-------|-------|-------|-------|-------|-------|----------|
| Crhr2          | 1.868 | 2.219 | 3.539 | 0.430 | 1.161 | 0.571 | 3.569 | 8.55E-03 |
| AABR07016992.1 | 4.372 | 3.803 | 4.466 | 1.398 | 1.509 | 0.936 | 3.501 | 4.34E-03 |
| Cryab          | 7.213 | 7.308 | 7.342 | 3.718 | 3.992 | 3.717 | 3.497 | 2.38E-06 |
| Sctr           | 1.857 | 1.842 | 2.315 | 0.244 | 0.384 | 0.425 | 3.389 | 1.20E-04 |
| Spetex-2F      | 4.128 | 4.174 | 5.262 | 1.162 | 1.842 | 1.669 | 3.380 | 1.06E-03 |
| Sox15          | 2.558 | 2.314 | 3.495 | 0.388 | 0.781 | 0.766 | 3.373 | 2.08E-03 |
| Ccdc180        | 0.565 | 0.709 | 1.120 | 0.020 | 0.186 | 0.108 | 3.333 | 1.03E-02 |
| Amz1           | 3.162 | 3.234 | 4.044 | 0.836 | 1.192 | 1.000 | 3.329 | 2.38E-05 |
| LOC102551549   | 1.652 | 1.744 | 2.409 | 0.109 | 0.533 | 0.524 | 3.194 | 1.54E-02 |
| Sash3          | 1.043 | 0.730 | 1.604 | 0.099 | 0.267 | 0.181 | 3.157 | 1.28E-02 |
| Anxa3          | 2.136 | 2.368 | 2.746 | 0.518 | 0.405 | 0.788 | 3.097 | 1.06E-03 |
| Rfx6           | 1.133 | 1.250 | 2.704 | 0.245 | 0.446 | 0.440 | 3.093 | 7.74E-03 |
| Gli1           | 0.586 | 0.859 | 1.266 | 0.090 | 0.126 | 0.193 | 3.092 | 4.33E-03 |
| Chrnd          | 0.717 | 0.990 | 1.225 | 0.051 | 0.263 | 0.136 | 3.085 | 1.03E-02 |
| Ntf4           | 0.712 | 0.971 | 1.613 | 0.062 | 0.170 | 0.318 | 3.068 | 2.77E-02 |
| Kank4          | 3.521 | 3.433 | 4.208 | 1.118 | 1.617 | 1.054 | 3.067 | 8.06E-05 |
| Esr1           | 2.822 | 2.808 | 3.573 | 0.609 | 1.247 | 0.655 | 3.063 | 4.48E-03 |
| AABR07016947.1 | 2.143 | 1.859 | 2.713 | 0.000 | 1.106 | 0.389 | 3.056 | 4.69E-02 |
| Nipal1         | 0.238 | 0.888 | 0.825 | 0.048 | 0.198 | 0.101 | 3.053 | 4.30E-02 |
| Fezf2          | 1.416 | 1.948 | 3.052 | 0.377 | 0.706 | 0.497 | 3.041 | 9.75E-03 |
| LOC100912034   | 1.401 | 1.036 | 2.298 | 0.244 | 0.194 | 0.514 | 3.031 | 3.92E-02 |
| Nodal          | 1.333 | 1.373 | 1.860 | 0.220 | 0.514 | 0.106 | 3.031 | 2.79E-02 |
| Ovol2          | 1.989 | 1.978 | 3.434 | 0.456 | 0.915 | 0.687 | 3.024 | 1.65E-02 |
| Cyp2s1         | 2.558 | 2.873 | 3.723 | 0.659 | 1.063 | 1.090 | 3.009 | 5.10E-04 |
| Adgrg2         | 2.965 | 2.937 | 3.792 | 0.816 | 1.141 | 1.172 | 3.004 | 2.63E-05 |
| Muc5b          | 0.259 | 0.454 | 0.541 | 0.031 | 0.068 | 0.075 | 2.992 | 5.08E-03 |
| Madcam1        | 3.429 | 4.151 | 3.944 | 1.178 | 1.772 | 1.323 | 2.914 | 4.27E-05 |
| Taf7l          | 1.492 | 1.599 | 2.032 | 0.200 | 0.192 | 0.710 | 2.913 | 3.56E-02 |
| Fam83a         | 2.251 | 2.261 | 3.219 | 0.484 | 1.015 | 0.728 | 2.897 | 1.15E-03 |

|                |       |       |       |       |       |       |       |          |
|----------------|-------|-------|-------|-------|-------|-------|-------|----------|
| Prss16         | 0.548 | 0.844 | 1.468 | 0.114 | 0.301 | 0.106 | 2.851 | 9.75E-03 |
| Ccdc169        | 0.718 | 1.350 | 1.343 | 0.106 | 0.222 | 0.354 | 2.808 | 3.21E-02 |
| Hspb1          | 6.497 | 6.744 | 7.601 | 3.842 | 4.179 | 4.499 | 2.798 | 6.45E-04 |
| Cilp           | 0.325 | 0.314 | 0.778 | 0.040 | 0.163 | 0.028 | 2.787 | 3.49E-02 |
| Vwf            | 2.010 | 2.141 | 2.933 | 0.399 | 0.805 | 0.862 | 2.776 | 1.97E-04 |
| Myo1h          | 1.596 | 1.318 | 1.867 | 0.184 | 0.647 | 0.282 | 2.774 | 2.32E-03 |
| Melk           | 3.086 | 3.333 | 4.280 | 1.153 | 1.340 | 1.713 | 2.759 | 4.39E-04 |
| RT1-M4         | 1.787 | 2.722 | 2.891 | 0.368 | 1.178 | 0.588 | 2.751 | 1.82E-02 |
| AABR07043453.1 | 6.825 | 6.579 | 7.504 | 4.570 | 4.377 | 3.522 | 2.743 | 8.96E-04 |
| Slco1c1        | 1.142 | 1.210 | 1.571 | 0.068 | 0.227 | 0.556 | 2.740 | 4.57E-03 |
| AABR07072112.1 | 2.042 | 2.199 | 3.133 | 0.538 | 1.024 | 0.715 | 2.732 | 1.09E-02 |
| Bmpr1b         | 1.782 | 1.655 | 2.316 | 0.196 | 0.873 | 0.442 | 2.706 | 1.97E-02 |
| Slc6a13        | 0.960 | 1.164 | 1.432 | 0.193 | 0.276 | 0.262 | 2.692 | 4.15E-03 |
| Baiap2l1       | 2.383 | 2.498 | 3.339 | 0.540 | 1.010 | 1.157 | 2.688 | 5.00E-04 |
| AABR07005779.3 | 1.323 | 1.624 | 2.178 | 0.421 | 0.423 | 0.417 | 2.687 | 9.91E-03 |
| Slc46a2        | 0.825 | 1.062 | 1.610 | 0.079 | 0.396 | 0.303 | 2.681 | 3.33E-02 |
| Cntnap2        | 6.254 | 6.332 | 6.523 | 4.608 | 3.878 | 3.859 | 2.622 | 5.08E-03 |
| Pik3ap1        | 1.654 | 1.743 | 2.675 | 0.354 | 0.855 | 0.575 | 2.599 | 3.14E-03 |
| AABR07060473.1 | 1.632 | 1.796 | 2.147 | 0.402 | 0.685 | 0.451 | 2.597 | 2.15E-02 |
| Adcy7          | 2.885 | 2.948 | 3.726 | 0.864 | 1.355 | 1.466 | 2.592 | 6.24E-04 |
| Popdc3         | 3.266 | 2.925 | 3.898 | 1.306 | 1.310 | 1.445 | 2.558 | 8.96E-04 |
| Tmem106a       | 2.685 | 3.059 | 3.745 | 0.688 | 1.486 | 1.508 | 2.555 | 5.45E-03 |
| Vav1           | 1.600 | 1.967 | 2.422 | 0.204 | 0.689 | 0.890 | 2.549 | 2.04E-02 |
| Tchh           | 4.298 | 4.636 | 5.449 | 1.897 | 2.998 | 2.566 | 2.543 | 3.16E-04 |
| Scd            | 3.524 | 3.720 | 4.600 | 1.282 | 2.043 | 2.110 | 2.533 | 2.40E-04 |
| Gsdmd          | 4.291 | 4.705 | 5.266 | 1.830 | 2.854 | 2.662 | 2.525 | 1.56E-03 |
| Crabp1         | 5.094 | 5.165 | 5.533 | 3.122 | 2.904 | 2.370 | 2.503 | 1.06E-03 |
| Tmem37         | 1.032 | 1.182 | 1.878 | 0.383 | 0.384 | 0.238 | 2.490 | 5.08E-03 |
| Edaradd        | 2.369 | 2.570 | 3.644 | 0.444 | 1.496 | 1.358 | 2.485 | 1.72E-02 |

|                |       |       |        |       |       |       |       |          |
|----------------|-------|-------|--------|-------|-------|-------|-------|----------|
| AC139642.1     | 2.146 | 1.688 | 2.852  | 0.478 | 0.642 | 1.136 | 2.461 | 2.44E-02 |
| Ddx43          | 2.589 | 2.642 | 3.360  | 1.001 | 1.333 | 0.968 | 2.459 | 9.65E-03 |
| Bag3           | 5.557 | 5.640 | 6.232  | 3.077 | 3.498 | 3.680 | 2.449 | 4.39E-04 |
| Tmem102        | 0.701 | 0.811 | 1.290  | 0.095 | 0.254 | 0.306 | 2.439 | 5.87E-03 |
| AABR07044980.1 | 1.012 | 1.036 | 1.623  | 0.125 | 0.511 | 0.323 | 2.418 | 3.81E-02 |
| Matn4          | 2.599 | 3.099 | 3.785  | 1.334 | 1.226 | 1.425 | 2.395 | 1.02E-02 |
| Acp5           | 2.898 | 3.239 | 3.800  | 1.156 | 1.816 | 1.340 | 2.389 | 1.60E-03 |
| Ikzf3          | 1.206 | 0.921 | 1.742  | 0.188 | 0.352 | 0.551 | 2.343 | 9.91E-03 |
| Krt13          | 2.346 | 2.118 | 3.183  | 0.605 | 1.252 | 1.089 | 2.335 | 2.19E-02 |
| Plod1          | 4.736 | 5.298 | 5.793  | 2.393 | 3.408 | 3.379 | 2.321 | 2.00E-03 |
| LOC102547811   | 4.638 | 4.673 | 5.397  | 2.932 | 2.878 | 2.280 | 2.313 | 3.45E-03 |
| Zfp185         | 3.675 | 3.613 | 4.456  | 1.517 | 2.335 | 1.905 | 2.307 | 8.96E-04 |
| Mcoln2         | 0.582 | 0.890 | 1.371  | 0.210 | 0.414 | 0.102 | 2.295 | 4.22E-02 |
| Kdelr3         | 5.702 | 5.600 | 6.434  | 3.498 | 3.720 | 4.055 | 2.294 | 1.06E-03 |
| Pde4c          | 1.071 | 0.944 | 1.380  | 0.265 | 0.237 | 0.396 | 2.287 | 3.69E-02 |
| Zfp663         | 2.225 | 2.461 | 3.355  | 0.657 | 1.661 | 0.907 | 2.276 | 8.70E-03 |
| Egfem1         | 1.032 | 1.276 | 1.555  | 0.342 | 0.285 | 0.463 | 2.267 | 1.03E-02 |
| Fosb           | 3.571 | 3.781 | 4.378  | 1.811 | 1.832 | 2.124 | 2.266 | 6.24E-04 |
| Plekhg3        | 6.149 | 6.480 | 6.948  | 4.018 | 4.554 | 4.270 | 2.258 | 9.14E-07 |
| Trim16         | 2.534 | 2.643 | 3.402  | 1.074 | 1.387 | 1.224 | 2.215 | 3.14E-04 |
| Mum1l1         | 2.401 | 2.042 | 2.905  | 0.722 | 1.123 | 1.130 | 2.207 | 2.54E-04 |
| Esr2           | 2.429 | 2.192 | 3.206  | 0.431 | 1.336 | 1.289 | 2.202 | 2.82E-02 |
| AABR07000740.1 | 9.303 | 8.992 | 10.064 | 7.502 | 7.171 | 7.010 | 2.190 | 3.53E-04 |
| Casq2          | 0.885 | 0.732 | 1.394  | 0.350 | 0.258 | 0.207 | 2.189 | 3.67E-02 |
| RT1-M5         | 2.736 | 3.068 | 3.575  | 1.144 | 1.839 | 1.145 | 2.188 | 1.78E-02 |
| LOC363337      | 7.412 | 7.350 | 8.113  | 5.592 | 5.474 | 5.267 | 2.182 | 2.60E-04 |
| Lad1           | 2.692 | 2.594 | 3.533  | 1.125 | 1.113 | 1.619 | 2.181 | 1.64E-02 |
| Dnai1          | 1.441 | 1.920 | 2.051  | 0.581 | 0.772 | 0.473 | 2.181 | 1.94E-02 |
| Gjb2           | 2.021 | 1.983 | 2.614  | 0.660 | 0.957 | 0.889 | 2.181 | 2.24E-03 |

|                |       |       |       |       |       |       |       |          |
|----------------|-------|-------|-------|-------|-------|-------|-------|----------|
| Krt42          | 1.162 | 1.196 | 1.975 | 0.330 | 0.630 | 0.444 | 2.176 | 3.32E-02 |
| AABR07043276.1 | 6.427 | 6.295 | 7.007 | 4.811 | 4.399 | 3.658 | 2.176 | 4.08E-03 |
| Lyve1          | 1.134 | 1.486 | 1.744 | 0.185 | 0.663 | 0.565 | 2.163 | 2.44E-02 |
| Btn1a1         | 1.002 | 1.061 | 1.534 | 0.316 | 0.463 | 0.297 | 2.153 | 8.10E-03 |
| Kcnk4          | 2.228 | 2.100 | 2.787 | 0.656 | 1.091 | 1.084 | 2.135 | 8.76E-03 |
| Lyzl4          | 3.178 | 3.158 | 4.310 | 1.612 | 1.876 | 1.947 | 2.126 | 2.39E-02 |
| RGD1311892     | 1.327 | 1.417 | 2.388 | 0.470 | 0.626 | 0.748 | 2.122 | 9.60E-03 |
| Comp           | 3.146 | 3.439 | 3.826 | 1.344 | 1.733 | 1.654 | 2.109 | 2.21E-03 |
| Smpdl3b        | 2.742 | 3.139 | 3.509 | 1.296 | 1.728 | 1.352 | 2.093 | 3.14E-03 |
| Rn60_20_0054.5 | 4.146 | 4.342 | 5.443 | 2.149 | 3.130 | 2.938 | 2.078 | 6.30E-03 |
| Cyp2d4         | 1.450 | 1.739 | 2.124 | 0.390 | 0.773 | 0.770 | 2.066 | 1.59E-03 |
| Glt8d2         | 2.655 | 2.661 | 3.052 | 0.665 | 1.572 | 1.451 | 2.061 | 8.09E-03 |
| Dsg2           | 2.141 | 2.114 | 2.991 | 0.719 | 1.138 | 1.337 | 2.013 | 8.30E-03 |
| Mro            | 3.123 | 2.897 | 3.779 | 1.402 | 1.722 | 1.656 | 2.012 | 3.16E-02 |
| Nlrp6          | 4.228 | 4.296 | 5.347 | 2.004 | 2.943 | 3.335 | 2.011 | 4.82E-02 |
| Eya4           | 1.611 | 1.592 | 2.320 | 0.309 | 1.050 | 0.784 | 1.994 | 2.16E-02 |
| Lmod3          | 1.093 | 1.158 | 1.576 | 0.544 | 0.480 | 0.177 | 1.988 | 4.16E-02 |
| Aox1           | 3.725 | 3.765 | 4.533 | 1.125 | 2.728 | 3.151 | 1.985 | 1.63E-02 |
| Mypn           | 0.284 | 0.738 | 0.893 | 0.116 | 0.211 | 0.246 | 1.976 | 4.82E-02 |
| Bik            | 2.489 | 2.481 | 3.680 | 1.096 | 1.664 | 1.567 | 1.959 | 1.00E-02 |
| Tacr2          | 1.834 | 1.675 | 2.129 | 0.475 | 1.034 | 0.700 | 1.957 | 2.91E-02 |
| Il25           | 2.341 | 2.966 | 3.509 | 1.216 | 1.608 | 1.510 | 1.955 | 1.02E-02 |
| Fam110d        | 3.016 | 3.018 | 4.106 | 1.676 | 1.733 | 1.944 | 1.952 | 1.89E-02 |
| Rp1l1          | 0.801 | 0.702 | 1.305 | 0.278 | 0.323 | 0.305 | 1.951 | 4.83E-02 |
| Ly6l           | 1.677 | 1.939 | 3.595 | 1.318 | 1.124 | 1.850 | 1.938 | 2.31E-02 |
| Greb1          | 2.584 | 3.241 | 2.996 | 0.951 | 1.832 | 1.492 | 1.922 | 2.33E-03 |
| Nckap1l        | 1.030 | 1.350 | 1.756 | 0.365 | 0.557 | 0.564 | 1.921 | 1.05E-02 |
| Arhgef26       | 1.839 | 2.045 | 2.725 | 0.754 | 0.908 | 1.227 | 1.913 | 3.49E-02 |
| Btc            | 2.898 | 3.014 | 3.823 | 1.310 | 1.799 | 2.048 | 1.911 | 1.57E-03 |

|                |       |       |       |       |       |       |       |          |
|----------------|-------|-------|-------|-------|-------|-------|-------|----------|
| Plxdc1         | 3.087 | 3.228 | 3.582 | 1.710 | 1.887 | 1.466 | 1.905 | 8.96E-04 |
| Ptpro          | 5.087 | 4.852 | 5.599 | 3.359 | 3.014 | 3.669 | 1.874 | 1.93E-03 |
| AABR07069816.1 | 2.265 | 2.219 | 2.651 | 0.983 | 1.125 | 1.171 | 1.872 | 2.84E-03 |
| Hspb2          | 2.234 | 2.625 | 2.427 | 1.089 | 1.484 | 0.528 | 1.849 | 3.00E-02 |
| Aldh1a2        | 3.544 | 3.162 | 3.608 | 2.078 | 1.752 | 1.647 | 1.847 | 1.97E-02 |
| Prokr2         | 1.793 | 2.335 | 1.557 | 0.675 | 0.638 | 1.065 | 1.843 | 3.92E-02 |
| Acvrl1         | 1.304 | 1.707 | 2.329 | 0.712 | 0.814 | 0.735 | 1.825 | 2.72E-02 |
| Prom2          | 1.409 | 1.442 | 1.940 | 0.563 | 0.622 | 0.718 | 1.824 | 6.45E-04 |
| Cdh23          | 1.160 | 1.230 | 1.666 | 0.244 | 0.750 | 0.589 | 1.801 | 1.72E-02 |
| LOC108348293   | 5.982 | 5.790 | 6.661 | 4.486 | 4.783 | 3.703 | 1.792 | 9.75E-03 |
| Sypl2          | 5.091 | 5.169 | 5.451 | 3.490 | 3.878 | 2.918 | 1.773 | 3.96E-03 |
| Calcr          | 0.805 | 0.788 | 1.159 | 0.217 | 0.428 | 0.359 | 1.771 | 1.78E-02 |
| AABR07043456.1 | 5.237 | 4.823 | 5.686 | 3.623 | 3.110 | 3.781 | 1.763 | 1.46E-02 |
| Kcns3          | 1.453 | 1.819 | 2.508 | 0.668 | 1.159 | 0.803 | 1.755 | 4.31E-02 |
| Myh7           | 0.810 | 0.964 | 1.393 | 0.370 | 0.364 | 0.454 | 1.740 | 2.05E-02 |
| Sec14l5        | 1.093 | 1.103 | 1.820 | 0.403 | 0.471 | 0.761 | 1.726 | 3.81E-02 |
| Myoz1          | 1.435 | 2.009 | 1.630 | 0.587 | 0.700 | 0.919 | 1.715 | 3.63E-02 |
| Otop3          | 1.817 | 1.761 | 2.361 | 1.036 | 0.890 | 0.698 | 1.713 | 1.69E-02 |
| Troap          | 1.964 | 1.970 | 2.638 | 0.555 | 1.054 | 1.473 | 1.710 | 2.72E-02 |
| C1ql2          | 3.277 | 3.283 | 4.399 | 2.108 | 2.178 | 2.355 | 1.704 | 2.18E-02 |
| Slc9a2         | 1.604 | 1.656 | 2.273 | 0.750 | 1.041 | 0.706 | 1.702 | 1.18E-02 |
| Morc4          | 3.945 | 4.031 | 4.860 | 2.399 | 2.989 | 3.129 | 1.697 | 2.08E-03 |
| Card14         | 2.062 | 2.175 | 2.994 | 0.864 | 1.383 | 1.432 | 1.693 | 1.19E-02 |
| Calr4          | 2.545 | 2.413 | 3.606 | 1.265 | 1.691 | 1.929 | 1.689 | 4.84E-02 |
| Pmaip1         | 6.093 | 5.994 | 6.912 | 4.403 | 4.883 | 4.935 | 1.667 | 6.12E-03 |
| Ociad2         | 6.720 | 6.490 | 6.908 | 4.994 | 5.191 | 4.893 | 1.659 | 2.40E-04 |
| Cib2           | 4.002 | 3.787 | 4.414 | 2.558 | 2.578 | 2.492 | 1.651 | 4.57E-03 |
| Bst2           | 8.419 | 8.887 | 9.353 | 6.280 | 7.611 | 7.707 | 1.650 | 4.75E-02 |
| LOC102551901   | 4.798 | 4.238 | 3.691 | 2.796 | 2.877 | 2.650 | 1.641 | 2.36E-02 |

|          |       |       |       |       |       |       |       |          |
|----------|-------|-------|-------|-------|-------|-------|-------|----------|
| Lrrc38   | 2.827 | 2.995 | 3.389 | 1.675 | 1.863 | 1.544 | 1.641 | 1.15E-03 |
| Pygm     | 3.233 | 3.703 | 3.427 | 2.083 | 2.233 | 1.676 | 1.636 | 2.58E-02 |
| Ccdc158  | 3.767 | 3.739 | 4.381 | 2.178 | 2.568 | 2.737 | 1.634 | 6.82E-03 |
| Accsl    | 1.774 | 1.906 | 2.252 | 0.864 | 0.870 | 1.071 | 1.631 | 7.30E-03 |
| Alpk2    | 0.944 | 0.863 | 1.307 | 0.387 | 0.482 | 0.375 | 1.613 | 9.17E-03 |
| Lamc2    | 4.570 | 4.772 | 4.689 | 2.739 | 3.683 | 2.723 | 1.608 | 1.44E-03 |
| Syt15    | 2.369 | 2.440 | 2.857 | 0.685 | 1.879 | 1.480 | 1.608 | 2.60E-02 |
| Zfp575   | 2.363 | 2.135 | 2.663 | 1.456 | 0.852 | 1.078 | 1.604 | 3.82E-02 |
| Intu     | 2.880 | 3.244 | 3.985 | 1.453 | 2.563 | 2.293 | 1.590 | 2.89E-02 |
| Eras     | 1.407 | 1.703 | 2.131 | 0.704 | 0.919 | 0.844 | 1.588 | 8.44E-03 |
| Saxo2    | 1.024 | 1.484 | 1.544 | 0.394 | 0.838 | 0.596 | 1.582 | 4.51E-02 |
| Gsdma    | 3.589 | 3.776 | 4.099 | 1.890 | 2.757 | 2.520 | 1.579 | 3.14E-04 |
| Gpr132   | 1.481 | 1.483 | 2.558 | 0.633 | 0.982 | 1.167 | 1.570 | 4.76E-02 |
| Samd5    | 1.872 | 2.116 | 2.536 | 0.404 | 1.383 | 1.513 | 1.564 | 3.21E-02 |
| Dennd2d  | 1.224 | 1.329 | 1.791 | 0.734 | 0.532 | 0.620 | 1.562 | 2.30E-02 |
| Gck      | 1.486 | 1.765 | 2.440 | 0.702 | 1.035 | 1.135 | 1.546 | 1.65E-02 |
| Phf11    | 2.970 | 3.293 | 3.218 | 1.495 | 1.959 | 2.163 | 1.541 | 2.21E-02 |
| Palm2    | 3.028 | 2.884 | 3.518 | 1.225 | 2.229 | 2.124 | 1.524 | 4.57E-03 |
| Pik3r5   | 1.894 | 2.016 | 2.493 | 0.787 | 1.294 | 1.251 | 1.506 | 1.54E-02 |
| Fgd5     | 1.124 | 1.098 | 1.732 | 0.333 | 0.901 | 0.589 | 1.498 | 4.33E-02 |
| Lrrc46   | 3.505 | 3.678 | 4.302 | 2.383 | 2.422 | 2.563 | 1.497 | 2.09E-03 |
| Thbs4    | 1.622 | 1.664 | 2.351 | 0.879 | 0.914 | 1.147 | 1.494 | 1.22E-02 |
| Scml4    | 1.906 | 1.712 | 2.656 | 0.659 | 1.241 | 1.426 | 1.490 | 3.71E-02 |
| Crispld2 | 5.399 | 5.785 | 5.930 | 3.422 | 4.571 | 4.521 | 1.486 | 7.30E-03 |
| Dmkn     | 2.077 | 2.487 | 2.823 | 1.460 | 1.339 | 1.560 | 1.485 | 1.89E-02 |
| Phf11b   | 4.451 | 4.616 | 5.147 | 2.973 | 3.228 | 3.701 | 1.471 | 1.75E-02 |
| Rasa4    | 5.383 | 5.760 | 5.541 | 4.226 | 4.229 | 3.687 | 1.458 | 6.23E-03 |
| Angptl1  | 1.062 | 1.292 | 1.735 | 0.626 | 0.940 | 0.481 | 1.447 | 3.54E-02 |
| Slco2b1  | 0.605 | 0.512 | 0.822 | 0.318 | 0.261 | 0.207 | 1.443 | 4.53E-02 |

|                |       |       |       |       |       |       |       |          |
|----------------|-------|-------|-------|-------|-------|-------|-------|----------|
| LOC679342      | 2.902 | 2.647 | 3.669 | 1.884 | 1.970 | 1.853 | 1.425 | 3.11E-02 |
| Prss56         | 2.383 | 2.329 | 2.673 | 1.273 | 1.588 | 1.307 | 1.416 | 9.75E-03 |
| Anxa4          | 5.084 | 5.371 | 5.755 | 3.425 | 4.187 | 4.198 | 1.412 | 6.58E-04 |
| Lingo3         | 4.493 | 4.664 | 5.023 | 3.065 | 3.500 | 3.465 | 1.407 | 2.84E-03 |
| AABR07043358.1 | 6.761 | 6.457 | 7.290 | 5.729 | 5.352 | 5.130 | 1.398 | 1.94E-02 |
| Grb7           | 2.511 | 2.723 | 2.967 | 1.405 | 1.912 | 1.503 | 1.388 | 1.04E-02 |
| AABR07042361.1 | 6.676 | 6.992 | 6.843 | 4.447 | 5.473 | 6.155 | 1.388 | 1.58E-02 |
| Fam126a        | 4.227 | 4.230 | 5.151 | 2.243 | 3.548 | 3.814 | 1.378 | 4.82E-02 |
| Parp3          | 4.406 | 4.662 | 5.200 | 2.915 | 3.621 | 3.743 | 1.378 | 1.28E-02 |
| LOC100910996   | 5.851 | 5.852 | 6.312 | 4.848 | 4.437 | 4.459 | 1.375 | 3.78E-03 |
| Figl1          | 2.872 | 2.887 | 3.652 | 1.731 | 2.178 | 2.153 | 1.369 | 2.90E-03 |
| Lrrc3c         | 3.431 | 3.200 | 3.506 | 1.544 | 2.147 | 2.747 | 1.369 | 3.56E-02 |
| Bfsp2          | 1.331 | 1.725 | 1.913 | 0.783 | 0.971 | 0.828 | 1.361 | 1.65E-02 |
| Sec31b         | 1.444 | 1.239 | 1.840 | 0.500 | 0.910 | 0.912 | 1.358 | 8.30E-03 |
| Wnk4           | 1.520 | 1.554 | 2.350 | 0.898 | 1.082 | 0.979 | 1.357 | 3.33E-02 |
| Mns1           | 3.864 | 3.815 | 4.709 | 2.362 | 3.246 | 3.238 | 1.345 | 1.02E-02 |
| Hsph1          | 7.947 | 7.922 | 8.467 | 6.362 | 6.741 | 7.139 | 1.338 | 1.90E-03 |
| Epha6          | 2.755 | 2.732 | 2.747 | 1.126 | 2.016 | 1.869 | 1.338 | 8.30E-03 |
| RT1-DMa        | 4.995 | 5.276 | 5.674 | 3.019 | 4.466 | 4.307 | 1.326 | 8.31E-03 |
| Arhgef28       | 2.469 | 3.004 | 2.804 | 1.148 | 1.921 | 1.984 | 1.324 | 5.98E-03 |
| AABR07042611.1 | 8.690 | 8.492 | 9.351 | 7.781 | 7.326 | 7.273 | 1.324 | 8.30E-03 |
| Mcf2           | 2.004 | 2.240 | 2.863 | 1.133 | 1.609 | 1.547 | 1.319 | 3.11E-02 |
| Heatr5a        | 3.607 | 3.654 | 4.483 | 2.013 | 2.998 | 3.141 | 1.302 | 1.86E-02 |
| LOC497899      | 4.132 | 4.193 | 4.884 | 2.992 | 3.404 | 3.144 | 1.300 | 2.71E-02 |
| C2cd2          | 3.533 | 3.313 | 3.932 | 1.998 | 2.600 | 2.550 | 1.298 | 1.33E-03 |
| Mpdz           | 4.586 | 4.544 | 5.125 | 2.799 | 3.669 | 4.021 | 1.292 | 2.30E-03 |
| Krt7           | 4.591 | 4.172 | 4.923 | 3.446 | 3.353 | 2.949 | 1.274 | 1.86E-02 |
| AABR07025272.1 | 3.574 | 3.195 | 2.942 | 1.553 | 2.671 | 2.249 | 1.273 | 2.38E-02 |
| Gstk1          | 3.700 | 3.636 | 4.204 | 2.469 | 2.732 | 2.785 | 1.272 | 1.01E-03 |

|                |       |       |       |       |       |       |       |          |
|----------------|-------|-------|-------|-------|-------|-------|-------|----------|
| AABR07058884.1 | 1.757 | 1.684 | 1.904 | 0.749 | 1.066 | 1.106 | 1.264 | 4.08E-03 |
| Thrb           | 3.592 | 3.600 | 4.260 | 2.222 | 2.847 | 2.863 | 1.260 | 1.16E-02 |
| Fhl3           | 3.798 | 3.918 | 4.533 | 2.718 | 3.059 | 2.925 | 1.252 | 3.88E-02 |
| Cers3          | 0.836 | 1.076 | 1.031 | 0.437 | 0.417 | 0.831 | 1.252 | 4.16E-02 |
| Asic2          | 4.832 | 4.778 | 4.948 | 3.604 | 3.501 | 3.762 | 1.226 | 1.99E-03 |
| Osbp13         | 3.260 | 3.246 | 3.890 | 1.991 | 2.397 | 2.753 | 1.225 | 5.55E-03 |
| LOC501421      | 4.938 | 5.190 | 5.698 | 4.405 | 3.804 | 3.745 | 1.224 | 4.69E-02 |
| LOC498265      | 2.881 | 3.193 | 3.807 | 2.012 | 2.399 | 2.402 | 1.196 | 7.30E-03 |
| Ccdc159        | 2.571 | 2.682 | 3.245 | 1.669 | 1.903 | 1.878 | 1.180 | 8.09E-03 |
| Ulk3           | 3.546 | 3.577 | 4.212 | 2.460 | 2.831 | 2.822 | 1.174 | 1.12E-03 |
| Lman2l         | 6.674 | 6.507 | 6.951 | 5.471 | 5.465 | 5.529 | 1.173 | 1.28E-03 |
| Herc6          | 4.860 | 5.115 | 5.476 | 3.296 | 4.402 | 4.261 | 1.173 | 4.16E-02 |
| Gpr3           | 3.368 | 3.548 | 3.913 | 2.307 | 2.596 | 2.520 | 1.172 | 5.13E-03 |
| Syt5           | 7.299 | 7.181 | 7.693 | 6.388 | 5.759 | 6.201 | 1.172 | 1.93E-02 |
| Tmem130        | 8.437 | 8.290 | 8.286 | 7.403 | 7.010 | 6.739 | 1.164 | 4.68E-02 |
| Lin7b          | 4.662 | 4.699 | 5.003 | 3.830 | 3.308 | 3.637 | 1.150 | 4.26E-02 |
| Rnf213         | 4.804 | 4.691 | 5.061 | 2.661 | 4.097 | 4.204 | 1.141 | 3.63E-02 |
| Lgals9         | 8.768 | 8.638 | 9.028 | 7.560 | 7.373 | 7.790 | 1.137 | 4.34E-03 |
| B3galnt2       | 4.008 | 4.187 | 5.066 | 2.879 | 3.495 | 3.740 | 1.135 | 1.83E-02 |
| Tap1           | 5.183 | 5.467 | 5.845 | 4.779 | 5.553 | 4.884 | 1.135 | 5.08E-03 |
| Lmo7           | 4.703 | 4.911 | 5.636 | 3.460 | 4.068 | 4.429 | 1.133 | 1.79E-02 |
| Aloxe3         | 5.117 | 5.552 | 5.837 | 4.143 | 4.557 | 4.350 | 1.132 | 5.21E-03 |
| Myo18b         | 1.858 | 2.371 | 2.617 | 0.938 | 1.669 | 1.733 | 1.131 | 4.03E-02 |
| Rgn            | 3.177 | 3.078 | 3.179 | 2.266 | 2.451 | 1.719 | 1.127 | 4.75E-02 |
| Rcan3          | 6.001 | 6.245 | 6.617 | 4.449 | 5.455 | 5.432 | 1.123 | 2.41E-03 |
| Calr3          | 3.615 | 3.753 | 4.005 | 2.526 | 3.006 | 2.735 | 1.119 | 3.61E-03 |
| Fam65b         | 2.780 | 2.607 | 3.411 | 1.708 | 2.290 | 2.027 | 1.114 | 2.48E-02 |
| Ggh            | 5.856 | 5.738 | 6.176 | 4.638 | 4.822 | 5.004 | 1.105 | 6.45E-04 |
| LOC108348065   | 6.515 | 6.671 | 6.907 | 5.466 | 5.722 | 5.483 | 1.101 | 1.10E-03 |



|          |       |       |       |       |       |       |       |          |
|----------|-------|-------|-------|-------|-------|-------|-------|----------|
| Dnajb1   | 6.864 | 6.690 | 7.362 | 5.762 | 5.720 | 6.028 | 1.100 | 1.15E-03 |
| Naa16    | 4.750 | 4.860 | 4.984 | 3.399 | 4.060 | 3.969 | 1.096 | 4.11E-05 |
| Echdc1   | 5.243 | 5.095 | 5.643 | 4.147 | 4.409 | 4.362 | 1.079 | 2.04E-04 |
| Ethe1    | 5.581 | 5.622 | 6.007 | 4.732 | 4.394 | 4.697 | 1.074 | 4.00E-03 |
| Trip10   | 4.835 | 4.917 | 5.405 | 3.840 | 4.084 | 4.103 | 1.056 | 6.24E-04 |
| Map3k6   | 3.038 | 3.128 | 3.600 | 2.249 | 2.398 | 2.275 | 1.053 | 8.09E-03 |
| Lca5     | 3.577 | 3.804 | 4.277 | 2.347 | 3.232 | 3.088 | 1.050 | 8.16E-03 |
| Znf354b  | 2.860 | 2.827 | 3.546 | 2.054 | 2.311 | 2.232 | 1.046 | 1.78E-02 |
| Tspan6   | 6.792 | 6.944 | 7.267 | 5.763 | 6.120 | 6.021 | 1.039 | 3.37E-05 |
| Relt     | 2.979 | 3.123 | 3.514 | 2.115 | 2.331 | 2.483 | 1.035 | 4.39E-03 |
| Unc5d    | 3.198 | 3.155 | 3.668 | 1.715 | 2.885 | 2.595 | 1.027 | 2.38E-02 |
| Mboat7l1 | 6.097 | 6.187 | 6.646 | 5.197 | 5.148 | 5.336 | 1.021 | 1.67E-03 |
| Scn3a    | 4.097 | 4.208 | 4.289 | 2.420 | 3.702 | 3.424 | 1.018 | 3.74E-02 |
| Ccdc14   | 2.757 | 2.928 | 3.345 | 1.862 | 2.279 | 2.297 | 1.015 | 1.15E-03 |
| Hn1l     | 4.698 | 5.203 | 5.768 | 3.755 | 4.452 | 4.527 | 1.005 | 4.98E-02 |
| P4ha1    | 4.620 | 4.830 | 5.430 | 3.424 | 4.131 | 4.389 | 1.005 | 1.65E-02 |
| Golm1    | 3.846 | 4.168 | 4.927 | 3.178 | 3.704 | 3.368 | 1.005 | 3.65E-02 |
| Ddx60    | 5.151 | 4.923 | 4.610 | 3.521 | 4.416 | 3.835 | 1.003 | 2.60E-02 |
| Sec23b   | 4.983 | 5.258 | 5.584 | 3.753 | 4.491 | 4.574 | 0.999 | 7.98E-03 |
| Calhm2   | 4.326 | 4.587 | 5.097 | 3.133 | 3.939 | 3.956 | 0.996 | 1.08E-02 |
| Mtrf1l   | 5.510 | 5.451 | 6.070 | 4.606 | 4.698 | 4.809 | 0.994 | 2.41E-03 |
| Slc30a2  | 3.841 | 3.650 | 4.028 | 2.904 | 2.987 | 2.847 | 0.987 | 2.12E-02 |
| Fam210b  | 3.296 | 3.141 | 3.862 | 2.373 | 2.673 | 2.669 | 0.986 | 1.63E-02 |
| Plekha7  | 3.313 | 3.772 | 4.259 | 2.142 | 3.173 | 3.196 | 0.983 | 3.47E-02 |
| Sertad3  | 3.083 | 3.004 | 3.663 | 2.326 | 2.483 | 2.326 | 0.974 | 3.34E-02 |
| Gprasp2  | 7.456 | 7.264 | 7.615 | 6.504 | 6.424 | 6.393 | 0.967 | 4.33E-03 |
| Sgms2    | 3.070 | 3.081 | 3.541 | 1.725 | 2.597 | 2.735 | 0.952 | 3.92E-02 |
| Zkscan2  | 3.098 | 3.353 | 3.432 | 1.953 | 2.910 | 2.469 | 0.940 | 1.22E-02 |
| Tlcd1    | 1.728 | 2.243 | 2.202 | 1.200 | 1.592 | 1.356 | 0.939 | 3.54E-02 |

|                |        |        |        |        |        |        |       |          |
|----------------|--------|--------|--------|--------|--------|--------|-------|----------|
| Mtus2          | 3.518  | 3.904  | 3.722  | 2.505  | 3.125  | 3.349  | 0.930 | 8.02E-03 |
| Zfp853         | 2.654  | 2.487  | 3.293  | 2.101  | 1.957  | 2.099  | 0.923 | 4.54E-02 |
| AABR07043445.1 | 5.924  | 6.199  | 6.530  | 4.427  | 5.607  | 5.616  | 0.921 | 2.89E-02 |
| Tigar          | 5.371  | 5.368  | 5.944  | 4.442  | 4.573  | 4.931  | 0.916 | 2.32E-03 |
| AABR07043564.1 | 5.255  | 5.149  | 5.843  | 4.471  | 4.597  | 4.502  | 0.910 | 2.58E-02 |
| Mreg           | 3.877  | 3.806  | 3.923  | 2.895  | 3.246  | 2.787  | 0.900 | 7.05E-03 |
| Vegfb          | 4.737  | 4.984  | 5.326  | 3.966  | 4.235  | 4.191  | 0.899 | 6.45E-04 |
| Setdb2         | 3.543  | 3.845  | 4.029  | 2.532  | 3.326  | 3.033  | 0.899 | 8.44E-03 |
| Nmt2           | 6.856  | 6.759  | 7.147  | 5.529  | 6.281  | 6.190  | 0.893 | 1.15E-03 |
| Ptpn13         | 3.964  | 4.235  | 4.670  | 2.793  | 3.653  | 3.758  | 0.892 | 4.86E-02 |
| Tmem255a       | 3.657  | 3.524  | 3.463  | 2.220  | 3.268  | 2.599  | 0.891 | 4.76E-02 |
| Pomt1          | 4.788  | 5.250  | 5.550  | 4.023  | 4.591  | 4.240  | 0.889 | 1.15E-03 |
| Abhd2          | 6.278  | 6.240  | 6.735  | 4.707  | 5.765  | 5.944  | 0.888 | 3.17E-02 |
| AABR07043510.1 | 4.347  | 4.546  | 4.869  | 3.538  | 4.000  | 3.694  | 0.888 | 4.34E-02 |
| Nfatc3         | 4.473  | 4.575  | 5.010  | 3.247  | 4.064  | 3.977  | 0.882 | 4.58E-03 |
| Rhpn1          | 4.859  | 5.478  | 5.277  | 4.113  | 4.464  | 4.327  | 0.880 | 2.18E-02 |
| Plod2          | 4.389  | 4.247  | 4.740  | 3.228  | 3.687  | 3.954  | 0.874 | 2.76E-02 |
| LOC619574      | 5.272  | 5.254  | 5.835  | 4.475  | 4.626  | 4.612  | 0.872 | 5.08E-03 |
| Rmt1           | 2.799  | 2.784  | 3.110  | 2.017  | 2.212  | 2.214  | 0.871 | 5.60E-03 |
| Hsp90ab1       | 11.121 | 11.128 | 11.325 | 10.266 | 10.105 | 10.344 | 0.870 | 1.16E-02 |
| Prim2          | 4.610  | 4.393  | 4.862  | 3.845  | 3.770  | 3.588  | 0.869 | 2.40E-02 |
| Lmo2           | 5.747  | 5.659  | 6.300  | 4.996  | 5.139  | 4.985  | 0.863 | 2.72E-02 |
| Zfp516         | 3.784  | 4.024  | 4.327  | 2.479  | 3.581  | 3.490  | 0.854 | 3.69E-02 |
| Zfp365         | 4.311  | 4.018  | 4.509  | 3.151  | 3.618  | 3.608  | 0.852 | 8.09E-03 |
| Mcam           | 6.418  | 6.355  | 6.652  | 5.476  | 5.648  | 5.698  | 0.839 | 2.72E-02 |
| Camkk1         | 5.006  | 4.992  | 5.397  | 4.187  | 4.394  | 4.254  | 0.834 | 6.23E-03 |
| Pacsin2        | 6.328  | 6.325  | 6.998  | 5.310  | 5.629  | 6.105  | 0.833 | 2.04E-02 |
| Gtf2f2         | 5.313  | 5.355  | 5.693  | 4.569  | 4.610  | 4.712  | 0.827 | 5.98E-03 |
| Atad2          | 4.240  | 4.452  | 4.796  | 2.972  | 4.046  | 4.017  | 0.826 | 4.76E-02 |

|           |       |       |       |       |       |       |       |          |
|-----------|-------|-------|-------|-------|-------|-------|-------|----------|
| Ift27     | 5.366 | 5.273 | 5.591 | 4.681 | 4.395 | 4.471 | 0.825 | 3.06E-02 |
| Edrf1     | 5.575 | 5.743 | 6.067 | 4.624 | 5.225 | 5.030 | 0.825 | 4.24E-04 |
| Hspa4     | 8.012 | 7.938 | 8.289 | 6.957 | 7.316 | 7.489 | 0.818 | 1.12E-03 |
| Timp3     | 4.841 | 4.672 | 5.195 | 3.850 | 4.310 | 4.025 | 0.818 | 9.24E-03 |
| LOC361646 | 3.535 | 3.687 | 4.194 | 2.507 | 3.216 | 3.360 | 0.815 | 1.09E-02 |
| Apba3     | 3.526 | 3.748 | 4.216 | 2.945 | 3.075 | 3.140 | 0.811 | 2.72E-02 |
| Cadm1     | 5.739 | 5.529 | 6.277 | 4.410 | 5.335 | 5.410 | 0.809 | 3.56E-02 |
| Anxa11    | 5.233 | 5.554 | 5.840 | 4.388 | 4.816 | 4.910 | 0.806 | 4.76E-02 |
| Snx3      | 8.866 | 8.853 | 8.964 | 8.159 | 7.861 | 7.994 | 0.802 | 7.98E-03 |
| Rab39a    | 5.145 | 5.071 | 5.630 | 4.166 | 4.625 | 4.744 | 0.797 | 7.45E-04 |
| Opa3      | 4.887 | 4.847 | 5.211 | 4.006 | 4.112 | 4.360 | 0.795 | 2.07E-03 |
| Gprasp1   | 7.709 | 7.558 | 7.750 | 6.694 | 7.012 | 6.877 | 0.792 | 4.57E-03 |
| Jak3      | 3.266 | 3.710 | 3.850 | 2.632 | 3.154 | 2.740 | 0.787 | 2.45E-02 |
| Ahsa2     | 6.064 | 6.088 | 6.296 | 5.141 | 5.469 | 5.448 | 0.786 | 8.96E-04 |
| Zfp449    | 2.952 | 2.937 | 3.619 | 2.033 | 2.543 | 2.834 | 0.786 | 1.36E-02 |
| Cacna2d2  | 5.080 | 5.053 | 5.646 | 4.182 | 4.496 | 4.663 | 0.780 | 1.24E-02 |
| Lap3      | 5.754 | 5.977 | 6.306 | 5.094 | 5.320 | 5.269 | 0.779 | 4.57E-03 |
| Efr3b     | 6.618 | 6.703 | 6.503 | 5.303 | 6.093 | 5.950 | 0.774 | 3.69E-02 |
| Inpp5a    | 5.057 | 5.058 | 5.711 | 4.326 | 4.368 | 4.792 | 0.767 | 1.72E-02 |
| Slc16a14  | 5.401 | 5.500 | 5.938 | 4.165 | 5.028 | 5.112 | 0.763 | 3.25E-02 |
| Dnaja4    | 5.859 | 5.786 | 6.226 | 5.056 | 5.210 | 5.285 | 0.762 | 5.17E-03 |
| Hspa4l    | 5.432 | 5.531 | 5.782 | 4.269 | 5.128 | 5.033 | 0.760 | 4.70E-03 |
| Cct8      | 8.269 | 8.115 | 8.374 | 7.470 | 7.372 | 7.619 | 0.753 | 1.44E-02 |
| Gusb      | 3.449 | 3.672 | 4.357 | 2.724 | 3.298 | 3.388 | 0.753 | 3.17E-02 |
| Iqcb1     | 5.841 | 5.881 | 6.297 | 5.241 | 5.264 | 5.208 | 0.752 | 5.13E-03 |
| Mphosph9  | 4.198 | 4.471 | 4.840 | 2.841 | 3.987 | 3.951 | 0.752 | 2.72E-02 |
| Prdm15    | 3.022 | 3.198 | 3.631 | 2.187 | 2.791 | 2.855 | 0.749 | 1.00E-02 |
| Bahd1     | 5.208 | 5.148 | 5.574 | 4.371 | 4.595 | 4.648 | 0.744 | 1.60E-03 |
| Ogfod1    | 4.264 | 4.357 | 4.751 | 3.200 | 3.903 | 4.041 | 0.741 | 4.96E-02 |

|              |       |       |       |       |       |       |       |          |
|--------------|-------|-------|-------|-------|-------|-------|-------|----------|
| Actr5        | 3.172 | 3.257 | 3.848 | 2.622 | 2.741 | 2.865 | 0.741 | 2.77E-02 |
| Trim65       | 5.080 | 5.223 | 5.680 | 4.406 | 4.714 | 4.612 | 0.736 | 1.54E-02 |
| Gnpda1       | 5.518 | 5.600 | 6.283 | 4.682 | 5.198 | 5.302 | 0.733 | 3.54E-02 |
| Ngdn         | 7.080 | 7.391 | 7.399 | 6.522 | 6.640 | 6.427 | 0.729 | 4.08E-03 |
| Prkab2       | 4.285 | 4.335 | 5.003 | 3.337 | 3.897 | 4.129 | 0.728 | 3.24E-02 |
| Pdxk         | 6.543 | 6.730 | 6.591 | 5.156 | 6.128 | 6.187 | 0.727 | 2.72E-02 |
| Dnaaf2       | 3.872 | 3.941 | 4.295 | 3.035 | 3.357 | 3.561 | 0.719 | 1.16E-02 |
| Pusl1        | 4.873 | 4.910 | 5.022 | 3.798 | 4.442 | 4.411 | 0.710 | 7.73E-03 |
| Tp53bp1      | 6.625 | 6.707 | 6.872 | 5.534 | 6.296 | 6.128 | 0.706 | 8.55E-03 |
| Nup210       | 3.958 | 4.086 | 4.566 | 3.036 | 3.561 | 3.907 | 0.699 | 1.26E-02 |
| Hyal3        | 4.105 | 4.485 | 4.438 | 3.556 | 3.779 | 3.596 | 0.684 | 4.69E-03 |
| Khynyn       | 4.456 | 4.485 | 4.860 | 3.226 | 4.307 | 4.135 | 0.683 | 4.08E-02 |
| Mrps7        | 6.341 | 6.346 | 6.677 | 5.806 | 5.752 | 5.641 | 0.677 | 4.26E-02 |
| Agpat5       | 5.168 | 5.217 | 5.555 | 4.200 | 4.715 | 4.983 | 0.677 | 6.25E-03 |
| Cept1        | 5.801 | 5.606 | 6.080 | 4.941 | 5.238 | 5.309 | 0.675 | 2.08E-03 |
| Pigh         | 4.238 | 3.809 | 4.516 | 3.484 | 3.555 | 3.656 | 0.672 | 2.72E-02 |
| LOC100910854 | 4.025 | 4.164 | 4.530 | 3.447 | 3.521 | 3.824 | 0.662 | 2.89E-02 |
| Erp29        | 6.992 | 7.196 | 7.527 | 6.516 | 6.597 | 6.660 | 0.660 | 1.18E-02 |
| Zfyve26      | 3.618 | 3.680 | 3.996 | 2.522 | 3.431 | 3.366 | 0.654 | 2.21E-02 |
| Uba7         | 2.961 | 3.065 | 3.269 | 2.503 | 2.466 | 2.466 | 0.654 | 1.89E-02 |
| Parm1        | 4.674 | 4.826 | 5.014 | 3.929 | 4.347 | 4.208 | 0.653 | 3.54E-02 |
| Cdan1        | 3.668 | 3.767 | 4.044 | 2.624 | 3.441 | 3.450 | 0.653 | 1.09E-02 |
| Tiam2        | 3.853 | 4.119 | 4.519 | 3.118 | 3.763 | 3.663 | 0.652 | 3.49E-02 |
| Unc13a       | 5.973 | 6.108 | 6.449 | 4.926 | 5.747 | 5.761 | 0.649 | 1.64E-02 |
| Wipf2        | 4.375 | 4.451 | 4.675 | 3.272 | 4.121 | 3.977 | 0.641 | 1.57E-02 |
| Chrnbl       | 2.214 | 2.446 | 2.524 | 1.604 | 1.985 | 2.006 | 0.638 | 4.54E-02 |
| Arl6ip4      | 5.176 | 5.505 | 5.841 | 4.855 | 4.681 | 4.885 | 0.637 | 4.69E-02 |
| Fam118a      | 5.288 | 5.142 | 5.611 | 4.542 | 4.727 | 4.794 | 0.635 | 8.31E-03 |
| Gpr68        | 5.776 | 5.905 | 6.166 | 5.149 | 5.377 | 5.287 | 0.635 | 3.47E-02 |

|            |       |       |       |        |        |        |        |          |
|------------|-------|-------|-------|--------|--------|--------|--------|----------|
| Ap4e1      | 4.546 | 4.623 | 4.881 | 3.350  | 4.304  | 4.437  | 0.631  | 3.27E-02 |
| Borcs6     | 5.080 | 5.267 | 5.605 | 4.651  | 4.614  | 4.706  | 0.630  | 3.16E-02 |
| Zfp593     | 3.901 | 4.037 | 4.393 | 3.425  | 3.403  | 3.638  | 0.630  | 3.44E-02 |
| Dhx29      | 4.258 | 4.249 | 4.779 | 3.464  | 3.884  | 4.080  | 0.629  | 1.58E-02 |
| RGD1563091 | 6.045 | 5.769 | 5.506 | 4.923  | 5.383  | 5.220  | 0.629  | 3.75E-02 |
| Lmnb2      | 4.203 | 4.234 | 4.622 | 3.470  | 3.682  | 4.066  | 0.625  | 2.58E-02 |
| Slc35c1    | 5.360 | 5.371 | 5.909 | 4.744  | 4.817  | 5.099  | 0.622  | 2.77E-02 |
| Ero1a      | 5.277 | 5.236 | 5.809 | 4.283  | 5.039  | 5.157  | 0.620  | 3.66E-02 |
| Elov15     | 6.454 | 6.583 | 6.998 | 5.663  | 6.149  | 6.288  | 0.616  | 1.76E-02 |
| RGD1304624 | 4.944 | 4.997 | 5.440 | 4.378  | 4.556  | 4.610  | 0.615  | 4.92E-02 |
| Asl        | 5.160 | 5.641 | 5.736 | 4.497  | 5.064  | 5.080  | 0.613  | 1.69E-02 |
| Dnaja1     | 8.752 | 8.625 | 8.877 | 7.986  | 8.151  | 8.331  | 0.612  | 4.20E-03 |
| Bcap31     | 7.275 | 7.034 | 7.430 | 6.559  | 6.611  | 6.645  | 0.608  | 1.06E-02 |
| Akip1      | 4.083 | 4.101 | 4.572 | 3.563  | 3.672  | 3.747  | 0.600  | 4.76E-02 |
| Atg9a      | 6.043 | 6.186 | 6.324 | 5.487  | 5.590  | 5.479  | 0.597  | 2.38E-02 |
| Rock2      | 6.430 | 6.479 | 6.661 | 4.961  | 6.173  | 6.245  | 0.597  | 3.49E-02 |
| Xrcc2      | 2.850 | 2.661 | 3.283 | 2.135  | 2.509  | 2.584  | 0.592  | 4.26E-02 |
| Nsun5      | 5.163 | 5.368 | 5.562 | 4.714  | 4.690  | 4.800  | 0.589  | 1.63E-02 |
| Cd99       | 4.939 | 5.024 | 5.382 | 5.484  | 5.724  | 5.694  | -0.585 | 4.12E-02 |
| Mfsd10     | 3.533 | 4.189 | 4.086 | 4.261  | 4.515  | 4.538  | -0.586 | 2.12E-02 |
| Gss        | 2.904 | 3.294 | 3.096 | 3.507  | 3.681  | 3.544  | -0.592 | 4.89E-02 |
| Nfkbie     | 3.920 | 4.396 | 4.130 | 4.448  | 4.782  | 4.724  | -0.603 | 2.95E-02 |
| Tmsb4x     | 9.762 | 9.700 | 9.990 | 10.429 | 10.227 | 10.502 | -0.605 | 3.47E-02 |
| Zfyve21    | 3.105 | 3.269 | 3.399 | 3.504  | 3.928  | 3.997  | -0.643 | 1.43E-02 |
| B3gat1     | 3.779 | 3.588 | 3.639 | 4.129  | 4.112  | 4.407  | -0.646 | 1.56E-02 |
| Chrd       | 2.443 | 2.424 | 2.237 | 2.793  | 2.849  | 2.957  | -0.650 | 3.00E-02 |
| Hes6       | 5.966 | 6.212 | 5.936 | 6.577  | 6.673  | 6.552  | -0.657 | 1.69E-02 |
| Gadd45a    | 5.793 | 6.010 | 5.691 | 6.197  | 6.756  | 6.484  | -0.669 | 2.71E-02 |
| Plekhj1    | 4.735 | 5.028 | 4.895 | 5.485  | 5.561  | 5.347  | -0.672 | 1.93E-02 |

|                |       |       |       |       |       |       |        |          |
|----------------|-------|-------|-------|-------|-------|-------|--------|----------|
| Adamts10       | 2.717 | 3.126 | 2.825 | 3.334 | 3.625 | 3.314 | -0.684 | 4.92E-02 |
| Slc35b2        | 4.076 | 4.419 | 4.141 | 4.648 | 4.909 | 4.914 | -0.692 | 1.51E-03 |
| Tmem200c       | 2.354 | 2.064 | 2.359 | 2.443 | 2.970 | 2.965 | -0.700 | 2.26E-02 |
| Rfxap          | 4.612 | 4.679 | 4.863 | 5.384 | 5.224 | 5.493 | -0.713 | 1.03E-02 |
| Gls2           | 3.158 | 3.379 | 3.354 | 3.817 | 3.948 | 3.993 | -0.723 | 1.36E-02 |
| Bcas1          | 4.593 | 4.497 | 4.568 | 4.981 | 5.172 | 5.507 | -0.736 | 4.98E-03 |
| Tle2           | 1.304 | 1.604 | 1.696 | 1.715 | 1.980 | 2.355 | -0.754 | 4.41E-02 |
| Cdh20          | 2.699 | 2.680 | 2.871 | 3.069 | 3.277 | 3.750 | -0.757 | 8.01E-03 |
| Ifngr1         | 3.917 | 4.069 | 4.192 | 4.392 | 4.888 | 4.934 | -0.775 | 8.09E-03 |
| Nrbp2          | 4.367 | 5.016 | 4.749 | 5.211 | 5.701 | 5.427 | -0.806 | 2.16E-02 |
| Tshr           | 1.289 | 1.153 | 1.136 | 1.395 | 1.815 | 1.855 | -0.821 | 1.60E-02 |
| Trib3          | 3.193 | 3.293 | 3.489 | 3.690 | 4.332 | 4.158 | -0.857 | 3.73E-02 |
| Sfrp2          | 4.391 | 4.320 | 4.691 | 4.824 | 5.245 | 5.640 | -0.861 | 7.64E-03 |
| Rgs10          | 5.204 | 5.082 | 5.094 | 6.129 | 5.816 | 5.736 | -0.907 | 3.54E-02 |
| Nxph4          | 4.070 | 4.087 | 4.096 | 5.119 | 4.748 | 4.686 | -0.938 | 2.72E-02 |
| Ctgf           | 1.215 | 1.458 | 1.576 | 1.688 | 2.097 | 2.578 | -1.046 | 3.47E-02 |
| Cpne7          | 1.647 | 2.091 | 1.985 | 2.400 | 2.739 | 2.972 | -1.047 | 2.45E-02 |
| LOC108351703   | 6.006 | 6.079 | 6.591 | 7.731 | 6.764 | 7.387 | -1.220 | 4.22E-02 |
| Scn4b          | 0.315 | 0.291 | 0.216 | 0.442 | 0.718 | 0.619 | -1.283 | 3.54E-02 |
| AABR07024498.1 | 3.765 | 3.692 | 4.369 | 5.962 | 5.775 | 5.873 | -2.037 | 4.12E-02 |
| Mmp3           | 0.977 | 0.896 | 2.271 | 3.309 | 4.345 | 3.140 | -2.709 | 2.36E-02 |

**Table S3. Gene ontology analysis for the HSF1 target genes in apoptotic CGNs.** Gene ontology analysis was performed using DAVID software for the HSF1-regulated genes identified from LK-treated CGNs. "pop total" is the total number of genes included in Biological Process (GO\_BP) or Molecular Function (GO\_MF) of the Gene ontology database; "pop hit" is the number of genes belong to a pathway and also in the GO\_BP or GO\_MF; "list hit" is the number of genes belong to our DEGs and also in the GO\_BP or GO\_MF.

| Top 9 biological processes or molecular functions HSF1 target genes are involved in | Category         | Term                                        | Genes                                                                                                                                                                                                                                                      | Count | List total | Pop hits | Pop total | P value |
|-------------------------------------------------------------------------------------|------------------|---------------------------------------------|------------------------------------------------------------------------------------------------------------------------------------------------------------------------------------------------------------------------------------------------------------|-------|------------|----------|-----------|---------|
|                                                                                     | GOTERM_BP_DIRECT | Protein transport                           | CALCR, KDELR3, ATG9A, LCA5, NUP210, LMAN2L, TAP1, LIN7B, APBA3, SNX3                                                                                                                                                                                       | 10    | 319        | 257      | 17535     | 0.0454  |
|                                                                                     | GOTERM_MF_DIRECT | ATP binding                                 | HSP90AB1, ACVRL1, XRCC2, FIGNL1, UBA7, TRIB3, CAMKK1, GSS, MAP3K6, HSPH1, DDX60, WNK4, TAP1, DNAJA1, HSPA4, DNAJA4, DDX43, NLRP6, PDXK, ROCK2, ALPK2, ATAD2, MYH7, MYO1H, MYO18B, EPHA6, DHX29, GCK, ULK3, GTF2F2, CCT8, HSPA4L, JAK3, BMPR1B, MELK, NRBP2 | 36    | 298        | 1403     | 16650     | 0.0269  |
|                                                                                     | GOTERM_MF_DIRECT | Calcium ion binding                         | TCHH, MATN4, EGFEM1, CALR4, SYT5, MMP3, ANXA4, ANXA3, CDH20, DSG2, COMP, ANXA11, ACAN, RGN, SYTL5, CALR3, CIB2, CASQ2, MELK, THBS4, CDH23                                                                                                                  | 21    | 298        | 696      | 16650     | 0.0249  |
|                                                                                     | GOTERM_BP_DIRECT | Negative regulation of gene expression      | VEGFB, CRHR2, ACVRL1, SFRP2, CTGF, CRYAB, ERP29, ESR1, HSPA4, LGALS9                                                                                                                                                                                       | 10    | 319        | 212      | 17535     | 0.0156  |
|                                                                                     | GOTERM_MF_DIRECT | Iron ion binding                            | OGFOD1, PLOD1, ALOXE3, P4HA1, CYP2D4, PLOD2, ETHE1, CYP2S1, SCD, AOX1                                                                                                                                                                                      | 10    | 298        | 202      | 16650     | 0.0106  |
|                                                                                     | GOTERM_BP_DIRECT | Intracellular signal transduction           | ADCY7, MPDZ, MCF2, ARHGEF28, DMRT1, VAV1, TIAM2, CTGF, WNK4, HSPB1, JAK3, RASA4, UNC13A, MELK, NRBP2                                                                                                                                                       | 15    | 319        | 381      | 17535     | 0.0100  |
|                                                                                     | GOTERM_BP_DIRECT | Cell adhesion                               | VWF, LYVE1, CADM1, DSG2, MPDZ, CTGF, COMP, ACAN, MADCAM1, LAMC2, MCAM, THBS4                                                                                                                                                                               | 12    | 319        | 261      | 17535     | 0.0083  |
|                                                                                     | KEGG_PATHWAY     | Protein processing in endoplasmic reticulum | HSP90AB1, HSPH1, SEC31B, ERO1A, CRYAB, ERP29, HSPA4L, DNAJA1, DNAJB1, SEC23B, BCAP31                                                                                                                                                                       | 11    | 135        | 168      | 7780      | 0.0006  |
|                                                                                     | GOTERM_BP_DIRECT | Protein folding                             | HSP90AB1, ERO1A, CALR4, CRYAB, CCT8, ERP29, HSPA4L, DNAJA1, CALR3, DNAJB1                                                                                                                                                                                  | 10    | 319        | 112      | 17535     | 0.0002  |

|                                       |                  |                                                                                           |                                                                                                                 |    |     |     |       |        |
|---------------------------------------|------------------|-------------------------------------------------------------------------------------------|-----------------------------------------------------------------------------------------------------------------|----|-----|-----|-------|--------|
| Apoptotic processes regulated by HSF1 | GOTERM_BP_DIRECT | Positive regulation of dendritic cell apoptotic process                                   | JAK3, LGALS9                                                                                                    | 2  | 319 | 4   | 17535 | 0.0706 |
|                                       | GOTERM_BP_DIRECT | Positive regulation of cysteine-type endopeptidase activity involved in apoptotic process | CTGF, NODAL, PMAIP1, BCAP31                                                                                     | 4  | 319 | 54  | 17535 | 0.0746 |
|                                       | GOTERM_BP_DIRECT | Negative regulation of apoptotic process                                                  | HSP90AB1, PDXK, FIGNL1, BAG3, CRYAB, BTC, ASIC2, NCKAP1L, NAA16, VEGFB, CARD14, COMP, DNAJA1, RGN, HSPB1, HSPA4 | 16 | 319 | 517 | 17535 | 0.0893 |
|                                       | GOTERM_BP_DIRECT | Regulation of apoptotic process                                                           | GLS2, IKZF3, RELT, SFRP2, NODAL, ESR1, ALX4                                                                     | 7  | 319 | 170 | 17535 | 0.0897 |

**Table S4. Function annotation for HSF1 target genes in apoptotic CGNs in neurological diseases.** Function annotation for HSF1-regulated genes in LK-treated CGNs was conducted using IPA. The function of these genes in neurological diseases, the *P* value, and the genes involved in each subcategory are shown.

| Diseases or function annotation                                                  | <i>P</i> value | Molecules                                                                                                  |
|----------------------------------------------------------------------------------|----------------|------------------------------------------------------------------------------------------------------------|
| Autosomal recessive deafness type 12                                             | 7.61E-04       | Cdh23, Gjb2                                                                                                |
| Familial slow-channel congenital myasthenic syndrome                             | 7.61E-04       | Chrn1, Chrnd                                                                                               |
| Schizoaffective disorder                                                         | 9.85E-04       | Chrn1, Chrnd, Esr1, Esr2, Gss, Inpp5a, Scn3a, Scn4b                                                        |
| Hydrocephalus                                                                    | 1.93E-03       | Apob, Chrn1, Chrnd, Dnaaf2, Dnai1, Mns1, Mpdz                                                              |
| Congenital myasthenic syndrome associated with acetylcholine receptor deficiency | 3.69E-03       | Chrn1, Chrnd                                                                                               |
| Usher syndrome type 1B                                                           | 6.74E-03       | Cdh23, Cib2                                                                                                |
| Cervical spondylotic myelopathy                                                  | 7.24E-03       | Cacna2d2, Scn3a, Scn4b                                                                                     |
| Apoptosis of neural precursor cells                                              | 1.06E-02       | Rock2, Xrcc2                                                                                               |
| Loss of hair cells                                                               | 1.28E-02       | Gjb2, Thrb                                                                                                 |
| Familial prelingual deafness                                                     | 1.48E-02       | Cdh23, Cib2, Dya4, Gjb2                                                                                    |
| Migraines                                                                        | 1.49E-02       | Cacna2d2, Esr1, Esr2, Pde4c, Scn3a, Scn4b, Vwf                                                             |
| Muscle-eye-brain disease                                                         | 1.52E-02       | B3galnt2, Pomt1                                                                                            |
| Congenital malformation of brain                                                 | 1.55E-02       | Acvr11, Alx4, Apob, B3galnt2, Bcap31, Cacna2d2, Chrnd, Cntnap2, Gadd45a, Lmnb2, Mpdz, Pomt1, Prokr2, Xrcc2 |



**Table S5. The statistics of DEGs found with different stringencies of cutoff.** 1.5 and 1 fold-changes were applied together with FDR control of 0.05 and 0.1. The numbers show up-regulated genes found in the condition listed in each row. For example, 969 genes are up-regulated in HK condition comparing HSF1 with HSF1-AB, while 357 genes are up-regulated in HK condition comparing HSF1-AB with HSF1, which means these 357 genes are down-regulated by HSF1 in HK when comparing with HSF1-AB. The up- and down-regulated genes by HSF1-AB comparing with GFP control are shown in bold fonts with gray background and highlighted in red and blue colors respectively.

|            |            | Fold change > 1.5 |            |           |         |            |           | Fold change > 1 |            |           |         |            |           |
|------------|------------|-------------------|------------|-----------|---------|------------|-----------|-----------------|------------|-----------|---------|------------|-----------|
|            |            | HSF1 HK           | HSF1-AB HK | GFP HK    | HSF1 LK | HSF1-AB LK | GFP LK    | HSF1 HK         | HSF1-AB HK | GFP HK    | HSF1 LK | HSF1-AB LK | GFP LK    |
| HSF1 HK    | FDR < 0.1  | 0                 | 1144       | 1254      | 1757    | 2193       | 2126      | 0               | 1607       | 1696      | 3709    | 4021       | 3901      |
| HSF1-AB HK |            | 514               | 0          | <b>22</b> | 2007    | 1411       | 1466      | 854             | 0          | <b>22</b> | 3895    | 3200       | 3245      |
| GFP HK     |            | 233               | <b>1</b>   | 0         | 2106    | 1749       | 1504      | 488             | <b>1</b>   | 0         | 3953    | 3514       | 3293      |
| HSF1 LK    |            | 3280              | 3742       | 4034      | 0       | 401        | 517       | 4205            | 4731       | 5062      | 0       | 600        | 732       |
| HSF1-AB LK |            | 3340              | 3166       | 3693      | 150     | 0          | <b>11</b> | 4286            | 4036       | 4681      | 278     | 0          | <b>11</b> |
| GFP LK     |            | 3118              | 3027       | 3344      | 58      | <b>0</b>   | 0         | 4100            | 3915       | 4262      | 168     | <b>0</b>   | 0         |
|            |            |                   |            |           |         |            |           |                 |            |           |         |            |           |
| HSF1 HK    | FDR < 0.05 | 0                 | 969        | 1075      | 1636    | 2052       | 1995      | 0               | 1255       | 1347      | 3025    | 3345       | 3315      |
| HSF1-AB HK |            | 357               | 0          | <b>13</b> | 1873    | 1301       | 1327      | 531             | 0          | <b>13</b> | 3295    | 2542       | 2586      |
| GFP HK     |            | 136               | <b>0</b>   | 0         | 1977    | 1616       | 1372      | 256             | <b>0</b>   | 0         | 3327    | 2865       | 2618      |
| HSF1 LK    |            | 2899              | 3471       | 3762      | 0       | 292        | 393       | 3513            | 4177       | 4489      | 0       | 388        | 506       |
| HSF1-AB LK |            | 3002              | 2852       | 3351      | 91      | 0          | <b>6</b>  | 3642            | 3429       | 4047      | 139     | 0          | <b>6</b>  |
| GFP LK     |            | 2745              | 2708       | 2977      | 32      | <b>0</b>   | 0         | 3416            | 3316       | 3589      | 68      | <b>0</b>   | 0         |

**Table S6. The DEGs responding to HSF1-AB in HK and LK conditions.** Particularly, those DEGs with FDR between 0.05 and 0.1 were shown with blue background. Uba7 is the only DEG found in both HK and LK conditions (shown with yellow background).

| HK       |              |              |              |          |          |          |       |          |        |
|----------|--------------|--------------|--------------|----------|----------|----------|-------|----------|--------|
| Genes    | HSF1-AB HK-1 | HSF1-AB HK-2 | HSF1-AB HK-3 | GFP HK-1 | GFP HK-2 | GFP HK-3 | logFC | P Value  | FDR    |
| Angptl1  | 0.66         | 0.98         | 1.04         | 0.00     | 0.00     | 0.00     | 6.71  | 6.87E-07 | 0.0028 |
| Ilgl2    | 0.78         | 1.09         | 1.47         | 0.17     | 0.30     | 0.30     | 2.44  | 5.24E-07 | 0.0028 |
| Oas1a    | 4.36         | 4.81         | 5.04         | 3.43     | 3.67     | 3.92     | 1.05  | 7.08E-07 | 0.0028 |
| Vdr      | 0.40         | 0.66         | 0.66         | 0.07     | 0.08     | 0.09     | 2.98  | 9.17E-07 | 0.0029 |
| Klc3     | 1.62         | 2.16         | 2.48         | 0.63     | 0.81     | 0.60     | 2.35  | 1.68E-06 | 0.0044 |
| Uba7     | 3.47         | 3.63         | 3.67         | 2.70     | 2.57     | 2.60     | 1.00  | 4.09E-06 | 0.0093 |
| Trpv4    | 0.39         | 0.59         | 0.67         | 0.06     | 0.07     | 0.14     | 2.72  | 1.08E-05 | 0.0172 |
| Kcp      | 0.43         | 0.73         | 0.69         | 0.07     | 0.18     | 0.12     | 2.46  | 1.04E-05 | 0.0172 |
| Cyp2d4   | 1.08         | 1.42         | 1.11         | 0.26     | 0.25     | 0.44     | 2.27  | 9.28E-06 | 0.0172 |
| Slc16a3  | 1.63         | 2.30         | 2.39         | 0.53     | 0.89     | 0.93     | 2.12  | 1.33E-05 | 0.0177 |
| Hck      | 2.60         | 2.79         | 3.53         | 1.36     | 1.22     | 1.83     | 1.86  | 1.25E-05 | 0.0177 |
| Pik3ap1  | 0.71         | 1.33         | 1.14         | 0.12     | 0.15     | 0.26     | 3.05  | 1.98E-05 | 0.0242 |
| Slc44a4  | 0.71         | 1.02         | 1.02         | 0.17     | 0.33     | 0.04     | 2.60  | 4.28E-05 | 0.0485 |
| Alox15   | 0.92         | 1.94         | 1.70         | 0.23     | 0.27     | 0.50     | 2.75  | 5.64E-05 | 0.0596 |
| Fstl3    | 0.79         | 1.73         | 1.68         | 0.06     | 0.46     | 0.40     | 2.72  | 8.55E-05 | 0.0781 |
| Nudt17   | 2.25         | 2.18         | 3.25         | 1.09     | 0.97     | 1.61     | 1.73  | 8.03E-05 | 0.0781 |
| Hpcal4   | 3.66         | 3.98         | 4.52         | 2.78     | 3.13     | 3.26     | 1.01  | 8.86E-05 | 0.0781 |
| Phldb3   | 0.66         | 1.20         | 1.57         | 0.10     | 0.44     | 0.11     | 2.80  | 1.03E-04 | 0.0815 |
| Fads3    | 4.04         | 4.32         | 4.62         | 3.30     | 3.55     | 3.89     | 0.69  | 1.02E-04 | 0.0815 |
| Tmem106a | 1.72         | 2.96         | 2.86         | 0.46     | 1.09     | 1.10     | 2.42  | 1.27E-04 | 0.0960 |
| Naaa     | 1.80         | 2.52         | 2.42         | 1.26     | 1.48     | 1.55     | 1.06  | 1.50E-04 | 0.0995 |
| Ccdc136  | 3.99         | 4.23         | 4.47         | 3.53     | 3.41     | 3.70     | 0.65  | 1.42E-04 | 0.0995 |
| Fam84a   | 4.60         | 4.59         | 4.70         | 5.11     | 5.08     | 5.69     | -0.80 | 1.47E-04 | 0.0995 |

| LK      |              |              |              |          |          |          |       |          |        |
|---------|--------------|--------------|--------------|----------|----------|----------|-------|----------|--------|
| Genes   | HSF1-AB LK-1 | HSF1-AB LK-2 | HSF1-AB LK-3 | GFP LK-1 | GFP LK-2 | GFP LK-3 | logFC | P Value  | FDR    |
| Nfam1   | 4.18         | 5.02         | 5.98         | 0.15     | 0.51     | 0.69     | 6.55  | 1.87E-07 | 0.0015 |
| Krt13   | 2.84         | 3.47         | 4.86         | 0.60     | 1.25     | 1.09     | 3.77  | 3.31E-06 | 0.0131 |
| Dhcr7   | 6.40         | 6.23         | 6.65         | 4.94     | 4.52     | 4.21     | 1.76  | 2.52E-06 | 0.0131 |
| Apob    | 0.49         | 1.23         | 2.49         | 0.01     | 0.07     | 0.01     | 6.58  | 6.44E-06 | 0.0205 |
| B3gnt7  | 3.35         | 3.60         | 4.32         | 2.31     | 2.67     | 2.35     | 1.44  | 9.12E-06 | 0.0241 |
| Ntf4    | 1.06         | 1.69         | 2.63         | 0.06     | 0.17     | 0.32     | 4.22  | 2.11E-05 | 0.0479 |
| Tmprss9 | 4.27         | 5.07         | 5.91         | 1.95     | 2.61     | 2.80     | 2.92  | 2.60E-05 | 0.0515 |
| Tmem51  | 4.01         | 4.25         | 5.03         | 3.10     | 3.34     | 3.47     | 1.15  | 4.31E-05 | 0.0713 |
| Cnp     | 6.53         | 6.66         | 7.45         | 5.69     | 5.87     | 6.14     | 0.95  | 4.49E-05 | 0.0713 |
| Uba7    | 3.13         | 3.23         | 3.36         | 2.50     | 2.47     | 2.47     | 0.80  | 5.01E-05 | 0.0723 |
